# Supplementary material
Source: HighWire-hosted journal article supplement (https://jmg.bmj.com/content/55/10/685)
Supplement: inline-supplementary-material-1 [file inline-supplementary-material-1.docx]

**Supplementary Methods**

**Study subjects and Demographic information**

All the 1,516 controls in the GWAS stage were individuals with neither GD nor family history of GD, and without any other autoimmune disorders. Control subjects were matched for sex with cases and were over 35 years. Since GD and other autoimmune thyroid diseases (AITD) have a preponderance in the young female population, this age criteria could reduce the number of controls who might develop GD later on.

**Methods**

We also tested the possible influence of the positions with multiallelic residues using a logistic regression model by means of an omnibus test (See supplementary methods). For a multiallelic locus with m possible alleles, we included *m*–1 alleles as independent variables in the logistic-regression model, and we arbitrarily selected the most common allele in the controls as the reference allele [[1](#_ENREF_1) [2](#_ENREF_2)]. This resulted in the following logistic-regression model:

where β0 is the logistic regression intercept, β1,*j* is the additive effects of allele *j*and *x*i,j is the allelic dosage (using the best-guess genotype or imputed dosage) of allele *j* in individual *i*. To assess the statistical signifi­cance of a tested position, we calculated the improvement of fit for the alternative model over the null model. We calculated the model improvement as deviance, defined by Δdeviancealt–null = –2ln (likelihoodalt/likelihoodnull), which follows a χ2distribution with *m* – 1 degrees of freedom, from which we calculated the omnibus *P* value (*P*omnibus).

1. Hu X, Deutsch AJ, Lenz TL, et al. Additive and interaction effects at three amino acid positions in HLA-DQ and HLA-DR molecules drive type 1 diabetes risk. Nature genetics 2015;**47**(8):898-905 doi: 10.1038/ng.3353

2. Zhu M, Dai J, Wang C, et al. Fine mapping the MHC region identified four independent variants modifying susceptibility to chronic hepatitis B in Han Chinese. Human molecular genetics 2016;**25**(6):1225-32 doi: 10.1093/hmg/ddw003[published Online First: Epub Date]|.

**Supplementary Figure 1** Plots of principal component analysis (PCA) and multidimensional scaling (MDS) analysis in our cohorts and the HapMap CHB samples. (**a**) Case-control cohorts (1,468 GD cases and 1,490 controls) and 45 Chinese (CHB) individuals from HapMap data were plotted using the first two eigenvectors produced by the EIGENSOFT software package. (**b**) The case-control cohorts and 45 Chinese (CHB) individuals were plotted by their first and second dimension values. MDS analysis was done using PLINK (http://pngu.mgh.harvard.edu/purcell/plink/).


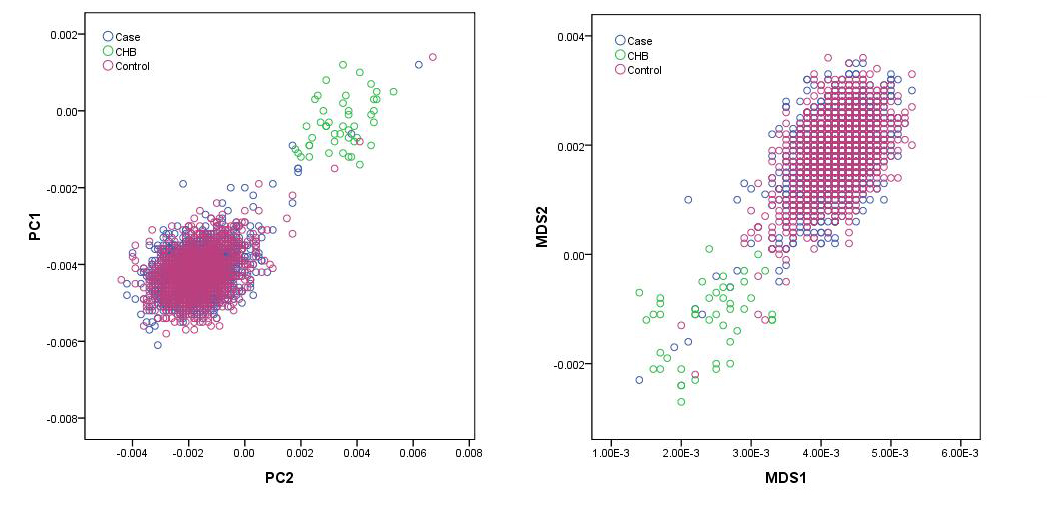


**Supplementary Figure 2** Linkage Disequilibrium (LD) and association plots of HLA region. *P* values were calculated by comparing all GD cases with controls. Each diamond represents a SNP, *HLA* amino acid residue or a classical *HLA* allele. The most strongly associated variant (*HLA* amino acid residue or classical *HLA* allele) of each HLA classical gene is indicated by a large blue diamond. The color of each variant spot reflects its r2 with the top variant (large blue diamond), changing from red to white. LD plot of A) HLA-A Arg151, B) HLA-B Arg 69, C) HLA*C 01:02, D) HLA-DPA1, E) Met 11 HLA-DPB1 Leu35, F) HLA-DQA1 His52 and G) HLA-DQB1 Ala-10 with HLA variation.


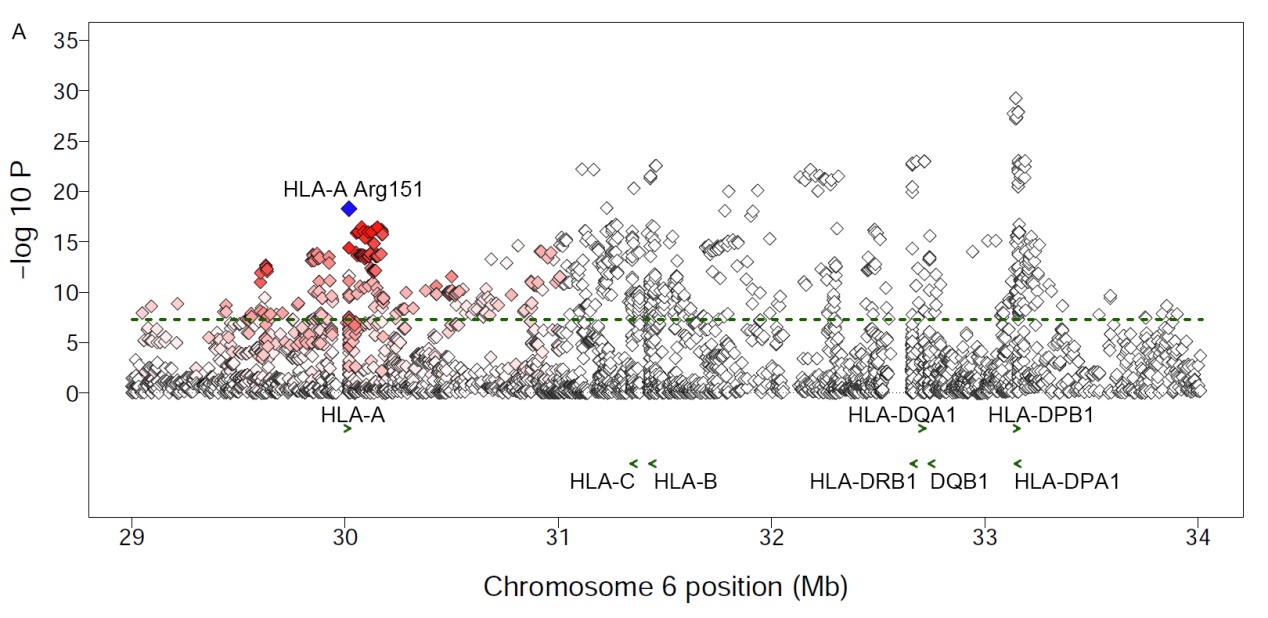


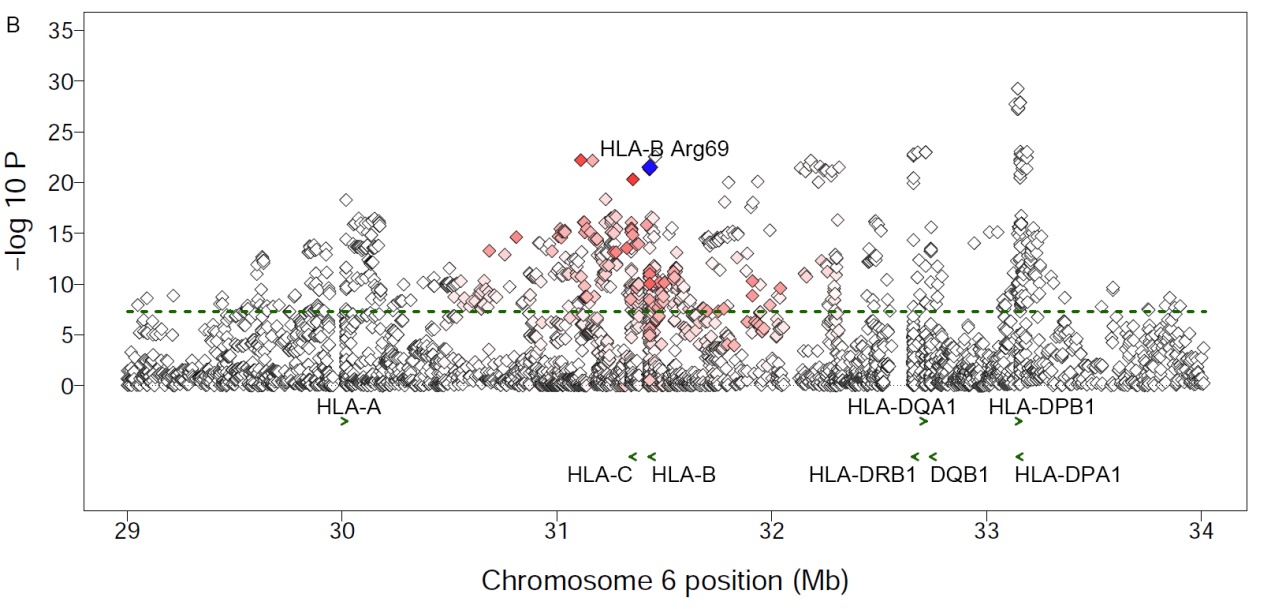


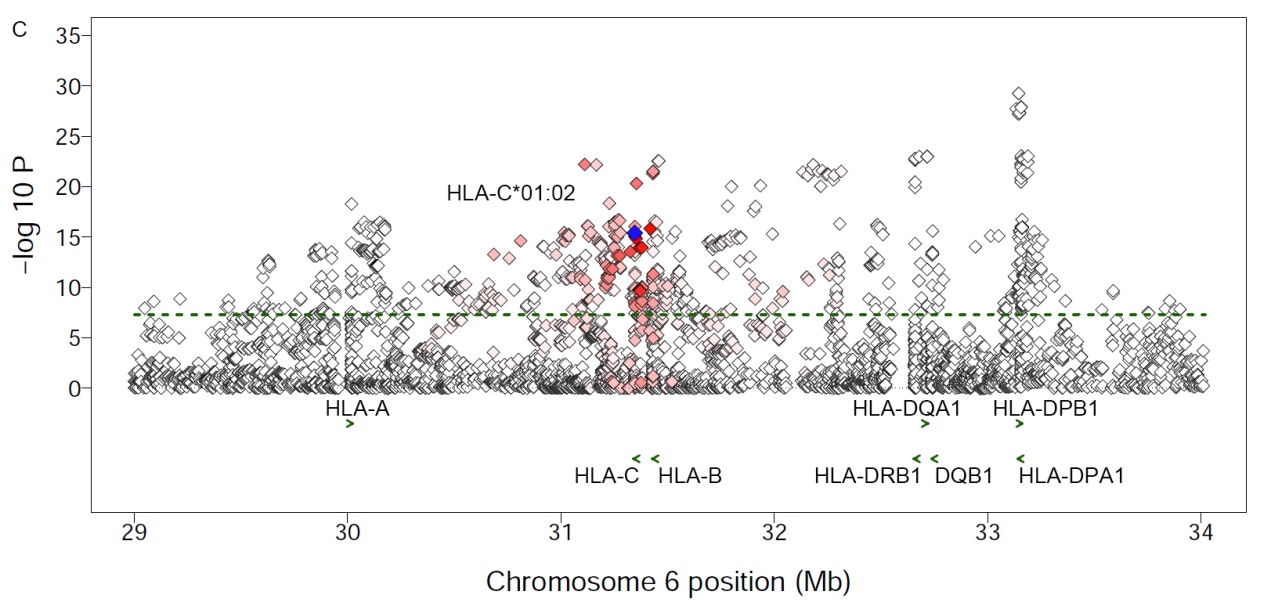


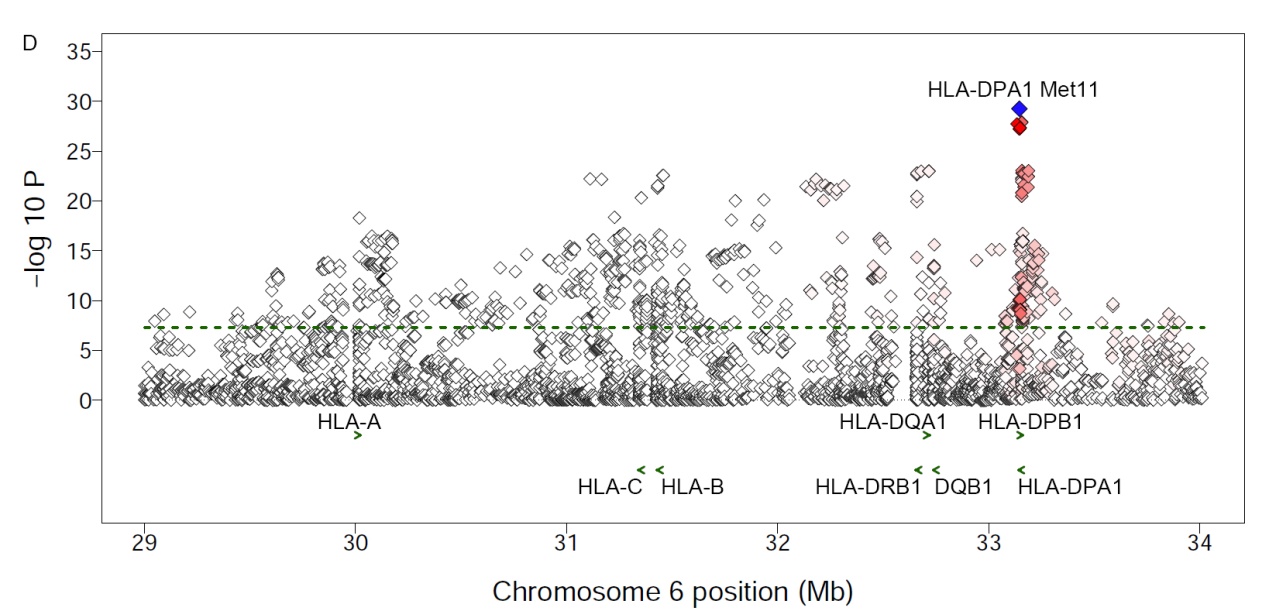


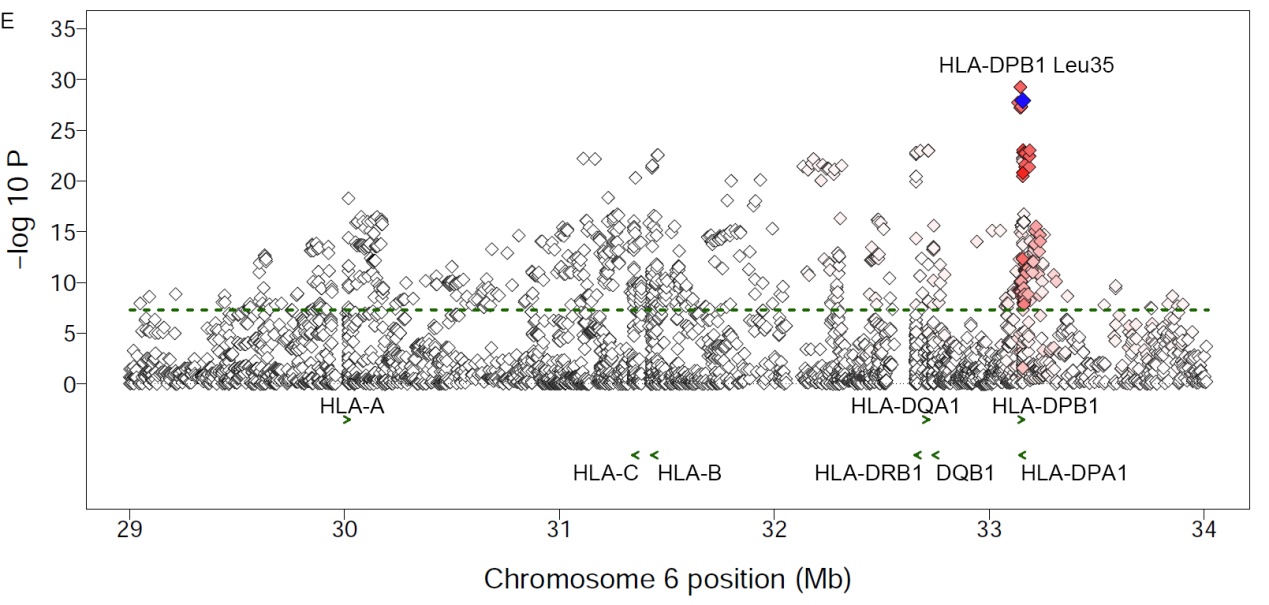


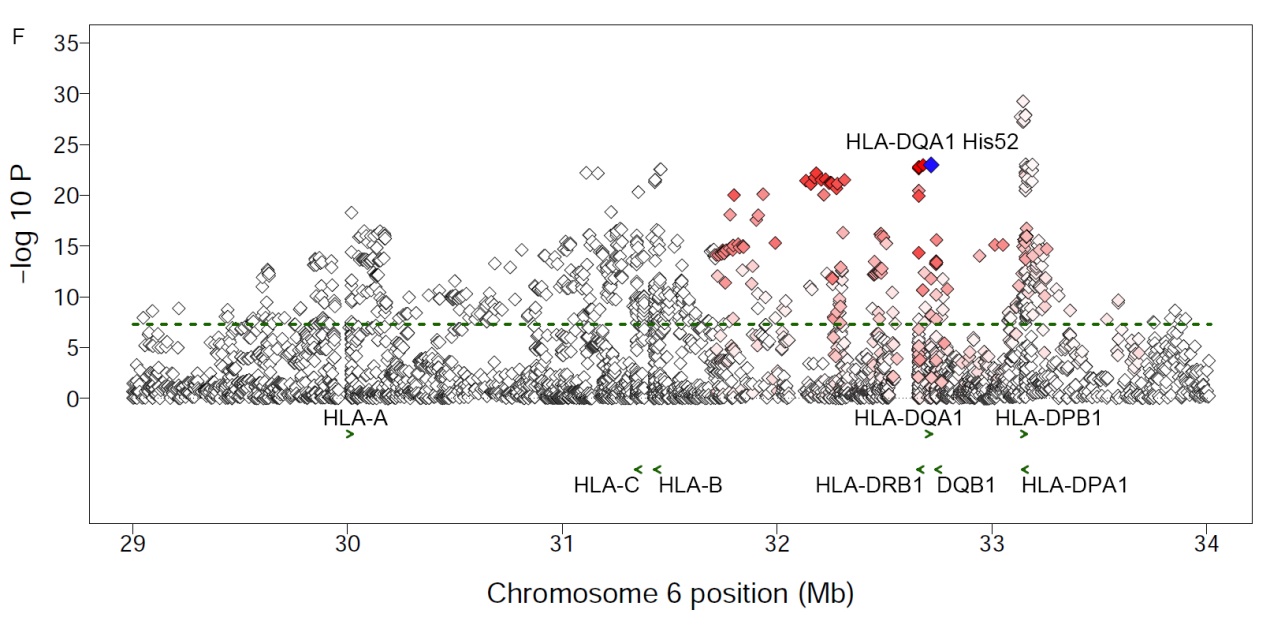


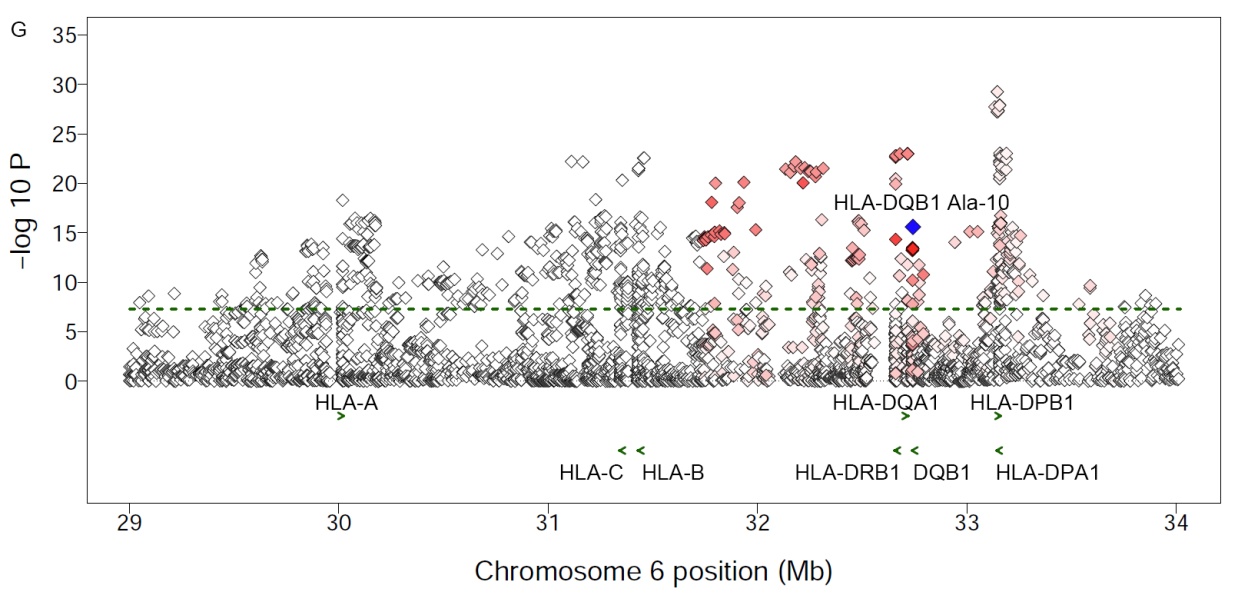


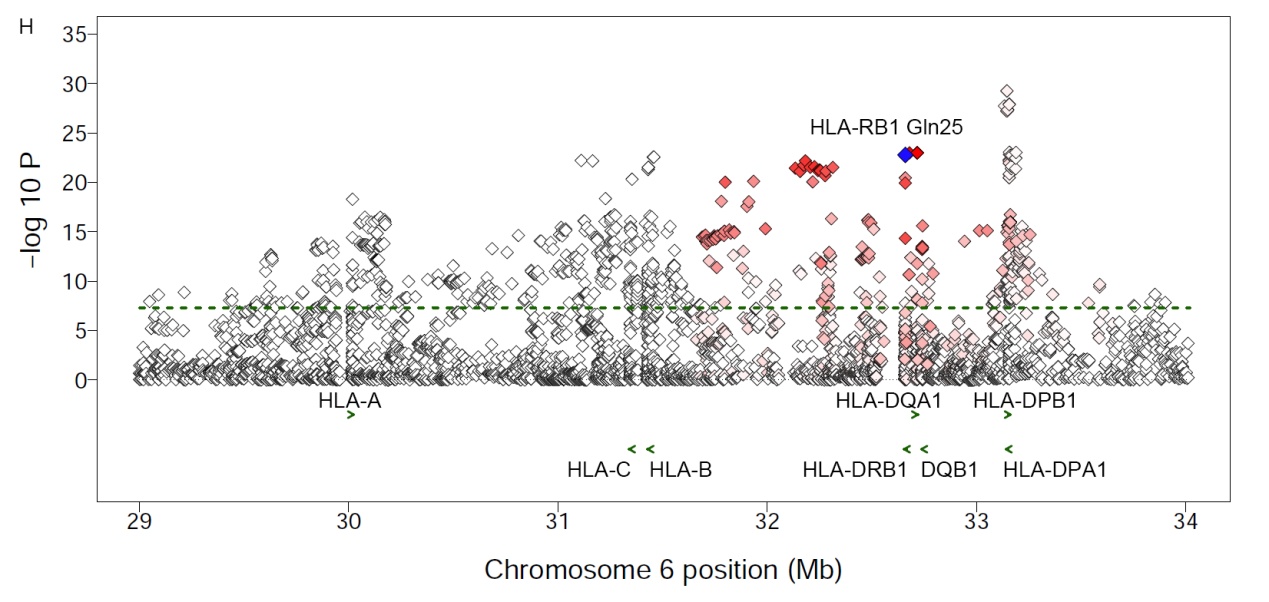


Supplementary Table S1. Demographic Information for the Samples

|  | Case | | |  | Control | | |
| --- | --- | --- | --- | --- | --- | --- | --- |
| Number of sample | Average age at enrollment | Age range at enrollment |  | Number of sample | Average age at enrollment | Age range at enrollment |
| Male | 370 | 40.0±14.3 | 10-81 |  | 368 | 46.8±10.3 | 35-87 |
| Female | 1166 | 39.1±13.7 | 10-81 |  | 1148 | 44.6±8.7 | 31-80 |
| Total | 1536 | 39.3±13.8 | 10-81 |  | 1516 | 45.1±9.1 | 31-87 |

Supplementary Table S2. Association results of imputed variations GD risk.

| Build 36 position  (bp) | Variant ID | plink INFO score | Imputation score  (Rsq) |  | Allele 1 Frequency | |  | Nominal | | |
| --- | --- | --- | --- | --- | --- | --- | --- | --- | --- | --- |
| Allele 1 | 1,468 GD patients | 1,490 controls | Allele 2 | Degree of Freedom | *P*logitic | OR (95%CI) |
| 30018537 | HLA-A position 9 |  |  |  |  |  |  | 3 | 4.94E-11 |  |
| 30018696 | HLA-A position 62 |  |  |  |  |  |  | 4 | 1.58E-06 |  |
| 30018699 | HLA-A position 63 |  |  |  |  |  |  | 2 | 7.17E-03 |  |
| 30018738 | HLA-A position 76 |  |  |  |  |  |  | 2 | 8.88E-01 |  |
| 30018741 | HLA-A position 77 |  |  |  |  |  |  | 2 | 4.43E-02 |  |
| 30019036 | HLA-A position 95 |  |  |  |  |  |  | 2 | 3.83E-07 |  |
| 30019042 | HLA-A position 97 |  |  |  |  |  |  | 2 | 4.08E-08 |  |
| 30019048 | HLA-A position 99 |  |  |  |  |  |  | 2 | 3.60E-12 |  |
| 30019093 | HLA-A position 114 |  |  |  |  |  |  | 3 | 1.16E-15 |  |
| 30019099 | HLA-A position 116 |  |  |  |  |  |  | 2 | 5.87E-12 |  |
| 30019207 | HLA-A position 152 |  |  |  |  |  |  | 3 | 1.54E-09 |  |
| 30019219 | HLA-A position 156 |  |  |  |  |  |  | 3 | 4.79E-03 |  |
| 31345841 | HLA-C position 275 |  |  |  |  |  |  | 3 | 3.85E-01 |  |
| 31346909 | HLA-C position 156 |  |  |  |  |  |  | 3 | 1.54E-10 |  |
| 31346921 | HLA-C position 152 |  |  |  |  |  |  | 2 | 2.14E-02 |  |
| 31347029 | HLA-C position 116 |  |  |  |  |  |  | 3 | 3.56E-16 |  |
| 31347080 | HLA-C position 99 |  |  |  |  |  |  | 3 | 2.82E-14 |  |
| 31347600 | HLA-C position 9 |  |  |  |  |  |  | 3 | 3.53E-21 |  |
| 31431300 | HLA-B position 199 |  |  |  |  |  |  | 2 | 1.83E-10 |  |
| 31431982 | HLA-B position 163 |  |  |  |  |  |  | 2 | 1.69E-04 |  |
| 31432003 | HLA-B position 156 |  |  |  |  |  |  | 3 | 9.69E-11 |  |
| 31432123 | HLA-B position 116 |  |  |  |  |  |  | 4 | 3.79E-12 |  |
| 31432180 | HLA-B position 97 |  |  |  |  |  |  | 4 | 6.89E-05 |  |
| 31432186 | HLA-B position 95 |  |  |  |  |  |  | 2 | 2.33E-04 |  |
| 31432476 | HLA-B position 80 |  |  |  |  |  |  | 2 | 1.70E-14 |  |
| 31432485 | HLA-B position 77 |  |  |  |  |  |  | 2 | 2.10E-09 |  |
| 31432506 | HLA-B position 70 |  |  |  |  |  |  | 3 | 3.04E-11 |  |
| 31432509 | HLA-B position 69 |  |  |  |  |  |  | 2 | 9.32E-22 |  |
| 31432515 | HLA-B position 67 |  |  |  |  |  |  | 4 | 3.54E-13 |  |
| 31432518 | HLA-B position 66 |  |  |  |  |  |  | 2 | 2.94E-22 |  |
| 31432581 | HLA-B position 45 |  |  |  |  |  |  | 4 | 5.77E-02 |  |
| 31432644 | HLA-B position 24 |  |  |  |  |  |  | 2 | 1.65E-10 |  |
| 31432689 | HLA-B position 9 |  |  |  |  |  |  | 3 | 7.92E-01 |  |
| 32657590 | HLA-DRB1 position 96 |  |  |  |  |  |  | 4 | 1.04E-04 |  |
| 32659926 | HLA-DRB1 position 74 |  |  |  |  |  |  | 4 | 2.03E-23 |  |
| 32659935 | HLA-DRB1 position 71 |  |  |  |  |  |  | 3 | 4.80E-05 |  |
| 32659938 | HLA-DRB1 position 70 |  |  |  |  |  |  | 2 | 8.61E-07 |  |
| 32659947 | HLA-DRB1 position 67 |  |  |  |  |  |  | 3 | 1.17E-01 |  |
| 32659968 | HLA-DRB1 position 60 |  |  |  |  |  |  | 3 | 2.97E-04 |  |
| 32659977 | HLA-DRB1 position 57 |  |  |  |  |  |  | 4 | 5.89E-08 |  |
| 32660037 | HLA-DRB1 position 37 |  |  |  |  |  |  | 5 | 3.25E-18 |  |
| 32660058 | HLA-DRB1 position 30 |  |  |  |  |  |  | 5 | 3.04E-25 |  |
| 32660064 | HLA-DRB1 position 28 |  |  |  |  |  |  | 3 | 5.22E-22 |  |
| 32660070 | HLA-DRB1 position 26 |  |  |  |  |  |  | 2 | 2.05E-06 |  |
| 32660100 | HLA-DRB1 position 16 |  |  |  |  |  |  | 2 | 1.80E-01 |  |
| 32660109 | HLA-DRB1 position 13 |  |  |  |  |  |  | 5 | 3.16E-22 |  |
| 32660115 | HLA-DRB1 position 11 |  |  |  |  |  |  | 5 | 3.19E-24 |  |
| 32660121 | HLA-DRB1 position 9 |  |  |  |  |  |  | 2 | 2.23E-06 |  |
| 32717191 | HLA-DQA1 position 47 |  |  |  |  |  |  | 3 | 7.94E-23 |  |
| 32717200 | HLA-DQA1 position 50 |  |  |  |  |  |  | 2 | 3.16E-02 |  |
| 32717206 | HLA-DQA1 position 52 |  |  |  |  |  |  | 2 | 7.69E-23 |  |
| 32717209 | HLA-DQA1 position 53 |  |  |  |  |  |  | 2 | 3.16E-02 |  |
| 32717218 | HLA-DQA1 position 56 |  |  |  |  |  |  | 2 | 4.58E-09 |  |
| 32717257 | HLA-DQA1 position 69 |  |  |  |  |  |  | 2 | 5.66E-04 |  |
| 32717278 | HLA-DQA1 position 76 |  |  |  |  |  |  | 2 | 4.58E-09 |  |
| 32717988 | HLA-DQA1 position 175 |  |  |  |  |  |  | 2 | 6.94E-06 |  |
| 32737913 | HLA-DQB1 position 125 |  |  |  |  |  |  | 3 | 3.16E-01 |  |
| 32740576 | HLA-DQB1 position 87 |  |  |  |  |  |  | 2 | 3.19E-03 |  |
| 32740579 | HLA-DQB1 position 86 |  |  |  |  |  |  | 2 | 1.08E-05 |  |
| 32740615 | HLA-DQB1 position 74 |  |  |  |  |  |  | 3 | 9.92E-13 |  |
| 32740624 | HLA-DQB1 position 71 |  |  |  |  |  |  | 4 | 3.01E-13 |  |
| 32740627 | HLA-DQB1 position 70 |  |  |  |  |  |  | 3 | 5.97E-03 |  |
| 32740666 | HLA-DQB1 position 57 |  |  |  |  |  |  | 4 | 3.27E-20 |  |
| 32740672 | HLA-DQB1 position 55 |  |  |  |  |  |  | 3 | 1.41E-12 |  |
| 32740726 | HLA-DQB1 position 37 |  |  |  |  |  |  | 2 | 1.59E-14 |  |
| 32740747 | HLA-DQB1 position 30 |  |  |  |  |  |  | 2 | 1.90E-14 |  |
| 32740759 | HLA-DQB1 position 26 |  |  |  |  |  |  | 3 | 3.51E-04 |  |
| 32740810 | HLA-DQB1 position 9 |  |  |  |  |  |  | 2 | 2.52E-06 |  |
| 32742277 | HLA-DQB1 position -4 |  |  |  |  |  |  | 2 | 2.62E-02 |  |
| 32742280 | HLA-DQB1 position -5 |  |  |  |  |  |  | 3 | 6.07E-02 |  |
| 32742283 | HLA-DQB1 position -6 |  |  |  |  |  |  | 3 | 1.64E-03 |  |
| 32742292 | HLA-DQB1 position -9 |  |  |  |  |  |  | 2 | 2.54E-02 |  |
| 32742295 | HLA-DQB1 position -10 |  |  |  |  |  |  | 2 | 2.32E-15 |  |
| 32742316 | HLA-DQB1 position -17 |  |  |  |  |  |  | 2 | 5.61E-05 |  |
| 32742319 | HLA-DQB1 position -18 |  |  |  |  |  |  | 2 | 6.45E-05 |  |
| 32742328 | HLA-DQB1 position -21 |  |  |  |  |  |  | 2 | 2.62E-02 |  |
| 32742346 | HLA-DQB1 position -27 |  |  |  |  |  |  | 2 | 2.54E-02 |  |
| 33145617 | HLA-DPA1 position 11 |  |  |  |  |  |  | 1 | 1.19E-31 |  |
| 33156439 | HLA-DPB1 position 9 |  |  |  |  |  |  | 2 | 2.25E-22 |  |
| 33156517 | HLA-DPB1 position 35 |  |  |  |  |  |  | 2 | 7.60E-31 |  |
| 33156577 | HLA-DPB1 position 55 |  |  |  |  |  |  | 2 | 5.73E-31 |  |
| 33156640 | HLA-DPB1 position 76 |  |  |  |  |  |  | 2 | 3.83E-07 |  |
| 33160714 | HLA-DPB1 position 96 |  |  |  |  |  |  | 2 | 1.32E-11 |  |
| 33160936 | HLA-DPB1 position 170 |  |  |  |  |  |  | 2 | 1.32E-11 |  |
| 33160960 | HLA-DPB1 position 178 |  |  |  |  |  |  | 2 | 7.47E-04 |  |
| 33161588 | HLA-DPB1 position 205 |  |  |  |  |  |  | 2 | 2.48E-33 |  |
| 30018338 | AA_A_-15_30018338_L | 0.9826 | 0.999 | P | 0.46 | 0.53 | A | 1 | 3.91E-08 | 0.75 ( 0.67- 0.83) |
| 30018338 | AA_A_-15_30018338_V | 0.9817 | 0.998 | P | 0.54 | 0.47 | A | 1 | 3.91E-08 | 1.34 ( 1.21- 1.49) |
| 30018350 | AA_A_-11_30018350_L | 0.977 | 0.999 | P | 0.13 | 0.18 | A | 1 | 3.79E-08 | 0.66 ( 0.57- 0.77) |
| 30018350 | AA_A_-11_30018350_S | 0.9749 | 0.997 | P | 0.87 | 0.82 | A | 1 | 3.79E-08 | 1.51 ( 1.30- 1.74) |
| 30018537 | AA_A_9_30018537_F | 1.0005 | 0.994 | P | 0.35 | 0.31 | A | 1 | 2.81E-03 | 1.18 ( 1.06- 1.32) |
| 30018537 | AA_A_9_30018537_S | 1.0131 | 0.994 | P | 0.22 | 0.26 | A | 1 | 8.63E-05 | 0.79 ( 0.70- 0.89) |
| 30018537 | AA_A_9_30018537_T | 0.986 | 1 | P | 0.12 | 0.16 | A | 1 | 1.48E-06 | 0.69 ( 0.59- 0.80) |
| 30018537 | AA_A_9_30018537_Y | 1.0122 | 0.995 | P | 0.32 | 0.27 | A | 1 | 2.43E-05 | 1.28 ( 1.14- 1.43) |
| 30018561 | AA_A_17_30018561 | 1.0271 | 0.995 | S | 0.07 | 0.11 | R | 1 | 6.80E-10 | 0.56 ( 0.47- 0.67) |
| 30018567 | AA_A_19_30018567 | 0.9564 | 0.958 | K | 0.01 | 0.01 | E | 1 | 1.05E-01 | 1.53 ( 0.92- 2.55) |
| 30018642 | AA_A_44_30018642 | 0.9837 | 0.998 | K | 0.04 | 0.04 | R | 1 | 2.45E-01 | 0.85 ( 0.65- 1.11) |
| 30018678 | AA_A_56_30018678 | 0.9957 | 0.996 | R | 0.10 | 0.16 | G | 1 | 1.92E-11 | 0.58 ( 0.50- 0.68) |
| 30018696 | AA_A_62_30018696_E | 1.0071 | 0.994 | P | 0.15 | 0.15 | A | 1 | 7.06E-01 | 1.03 ( 0.89- 1.19) |
| 30018696 | AA_A_62_30018696_G | 1.0044 | 0.996 | P | 0.34 | 0.28 | A | 1 | 3.31E-07 | 1.34 ( 1.20- 1.49) |
| 30018696 | AA_A_62_30018696_L | 0.9858 | 1 | P | 0.01 | 0.01 | A | 1 | 5.95E-01 | 1.13 ( 0.73- 1.75) |
| 30018696 | AA_A_62_30018696_Q | 0.9985 | 0.999 | P | 0.38 | 0.42 | A | 1 | 1.68E-03 | 0.85 ( 0.76- 0.94) |
| 30018696 | AA_A_62_30018696_R | 0.9866 | 0.998 | P | 0.12 | 0.14 | A | 1 | 1.96E-03 | 0.78 ( 0.67- 0.91) |
| 30018699 | AA_A_63_30018699_E | 0.9949 | 0.998 | P | 0.87 | 0.84 | A | 1 | 5.45E-03 | 1.23 ( 1.06- 1.43) |
| 30018699 | AA_A_63_30018699_N | 0.9866 | 0.998 | P | 0.12 | 0.14 | A | 1 | 1.96E-03 | 0.78 ( 0.67- 0.91) |
| 30018699 | AA_A_63_30018699_Q | 0.9858 | 1 | P | 0.01 | 0.01 | A | 1 | 5.95E-01 | 1.13 ( 0.73- 1.75) |
| 30018705 | AA_A_65_30018705 | 1.0074 | 0.994 | G | 0.15 | 0.15 | R | 1 | 7.06E-01 | 1.03 ( 0.89- 1.19) |
| 30018708 | AA_A_66_30018708 | 0.9789 | 0.999 | K | 0.49 | 0.43 | N | 1 | 3.30E-07 | 1.31 ( 1.18- 1.46) |
| 30018711 | AA_A_67_30018711 | 0.9837 | 0.998 | M | 0.04 | 0.04 | V | 1 | 2.45E-01 | 0.85 ( 0.65- 1.11) |
| 30018720 | AA_A_70_30018720 | 0.9866 | 0.974 | Q | 0.32 | 0.34 | H | 1 | 2.00E-01 | 0.93 ( 0.84- 1.04) |
| 30018729 | AA_A_73_30018729 | 0.99 | 1 | I | 0.10 | 0.15 | T | 1 | 1.55E-07 | 0.65 ( 0.56- 0.77) |
| 30018732 | AA_A_74_30018732 | 1.0013 | 0.993 | H | 0.34 | 0.28 | D | 1 | 2.86E-07 | 1.34 ( 1.20- 1.50) |
| 30018738 | AA_A_76_30018738_A | 0.9956 | 0.996 | P | 0.09 | 0.09 | A | 1 | 6.43E-01 | 1.04 ( 0.87- 1.25) |
| 30018738 | AA_A_76_30018738_E | 0.9873 | 0.992 | P | 0.16 | 0.17 | A | 1 | 6.01E-01 | 0.96 ( 0.84- 1.11) |
| 30018738 | AA_A_76_30018738_V | 1.0092 | 0.994 | P | 0.75 | 0.75 | A | 1 | 8.83E-01 | 1.01 ( 0.90- 1.13) |
| 30018741 | AA_A_77_30018741_D | 1.0092 | 0.994 | P | 0.75 | 0.75 | A | 1 | 8.83E-01 | 1.01 ( 0.90- 1.13) |
| 30018741 | AA_A_77_30018741_N | 1.0116 | 0.993 | P | 0.24 | 0.23 | A | 1 | 5.36E-01 | 1.04 ( 0.92- 1.17) |
| 30018741 | AA_A_77_30018741_S | 1.0002 | 1 | P | 0.01 | 0.02 | A | 1 | 1.47E-02 | 0.61 ( 0.41- 0.91) |
| 30018747 | AA_A_79_30018747 | 0.9882 | 0.993 | R | 0.16 | 0.17 | G | 1 | 6.01E-01 | 0.96 ( 0.84- 1.11) |
| 30018750 | AA_A_80_30018750 | 0.9876 | 0.992 | I | 0.16 | 0.17 | T | 1 | 6.01E-01 | 0.96 ( 0.84- 1.11) |
| 30018753 | AA_A_81_30018753 | 0.9887 | 0.993 | A | 0.16 | 0.17 | L | 1 | 6.01E-01 | 0.96 ( 0.84- 1.11) |
| 30018756 | AA_A_82_30018756 | 0.9881 | 0.993 | L | 0.16 | 0.17 | R | 1 | 6.01E-01 | 0.96 ( 0.84- 1.11) |
| 30018759 | AA_A_83_30018759 | 0.9874 | 0.992 | R | 0.16 | 0.17 | G | 1 | 6.01E-01 | 0.96 ( 0.84- 1.11) |
| 30018780 | AA_A_90_30018780 | 1.0228 | 0.998 | D | 0.26 | 0.22 | A | 1 | 1.11E-03 | 1.22 ( 1.08- 1.37) |
| 30019036 | AA_A_95_30019036_I | 0.975 | 0.997 | P | 0.51 | 0.57 | A | 1 | 4.11E-07 | 0.76 ( 0.69- 0.85) |
| 30019036 | AA_A_95_30019036_L | 1.0054 | 0.992 | P | 0.15 | 0.15 | A | 1 | 7.06E-01 | 1.03 ( 0.89- 1.19) |
| 30019036 | AA_A_95_30019036_V | 1.0011 | 0.994 | P | 0.34 | 0.28 | A | 1 | 3.76E-07 | 1.33 ( 1.19- 1.49) |
| 30019042 | AA_A_97_30019042_I | 1.0103 | 0.998 | P | 0.33 | 0.35 | A | 1 | 1.08E-01 | 0.92 ( 0.82- 1.02) |
| 30019042 | AA_A_97_30019042_M | 0.9879 | 0.993 | P | 0.29 | 0.34 | A | 1 | 2.87E-05 | 0.79 ( 0.71- 0.88) |
| 30019042 | AA_A_97_30019042_R | 0.9811 | 0.991 | P | 0.38 | 0.31 | A | 1 | 1.27E-08 | 1.37 ( 1.23- 1.53) |
| 30019048 | AA_A_99_30019048_C | 0.9169 | 0.909 | P | 0.10 | 0.05 | A | 1 | 2.07E-12 | 2.13 ( 1.72- 2.62) |
| 30019048 | AA_A_99_30019048_F | 1.001 | 0.988 | P | 0.15 | 0.15 | A | 1 | 7.36E-01 | 1.03 ( 0.89- 1.18) |
| 30019048 | AA_A_99_30019048_Y | 0.905 | 0.872 | P | 0.75 | 0.80 | A | 1 | 2.30E-06 | 0.74 ( 0.65- 0.84) |
| 30019066 | AA_A_105_30019066 | 1.0202 | 0.988 | P | 0.28 | 0.25 | S | 1 | 1.46E-02 | 1.15 ( 1.03- 1.30) |
| 30019072 | AA_A_107_30019072 | 0.999 | 0.992 | W | 0.34 | 0.28 | G | 1 | 3.20E-07 | 1.34 ( 1.20- 1.49) |
| 30019078 | AA_A_109_30019078 | 0.9435 | 0.939 | L | 0.01 | 0.02 | F | 1 | 1.47E-02 | 0.61 ( 0.41- 0.91) |
| 30019093 | AA_A_114_30019093_E | 1.0232 | 0.991 | P | 0.07 | 0.11 | A | 1 | 6.80E-10 | 0.56 ( 0.47- 0.67) |
| 30019093 | AA_A_114_30019093_H | 0.9748 | 0.997 | P | 0.49 | 0.43 | A | 1 | 4.11E-07 | 1.31 ( 1.18- 1.46) |
| 30019093 | AA_A_114_30019093_Q | 0.9624 | 0.986 | P | 0.15 | 0.20 | A | 1 | 4.83E-06 | 0.73 ( 0.63- 0.83) |
| 30019093 | AA_A_114_30019093_R | 0.9928 | 0.983 | P | 0.29 | 0.26 | A | 1 | 1.90E-02 | 1.15 ( 1.02- 1.29) |
| 30019099 | AA_A_116_30019099_D | 0.9816 | 0.997 | P | 0.44 | 0.46 | A | 1 | 1.69E-01 | 0.93 ( 0.84- 1.03) |
| 30019099 | AA_A_116_30019099_H | 1.0242 | 0.992 | P | 0.07 | 0.11 | A | 1 | 6.80E-10 | 0.56 ( 0.47- 0.67) |
| 30019099 | AA_A_116_30019099_Y | 0.9748 | 0.997 | P | 0.49 | 0.43 | A | 1 | 4.11E-07 | 1.31 ( 1.18- 1.46) |
| 30019132 | AA_A_127_30019132 | 0.9792 | 0.996 | K | 0.50 | 0.44 | N | 1 | 9.96E-07 | 1.3 ( 1.17- 1.44) |
| 30019177 | AA_A_142_30019177 | 1.0031 | 0.993 | T | 0.35 | 0.29 | I | 1 | 9.56E-07 | 1.32 ( 1.18- 1.47) |
| 30019183 | AA_A_144_30019183 | 0.9838 | 0.996 | Q | 0.23 | 0.33 | K | 1 | 9.70E-15 | 0.63 ( 0.56- 0.71) |
| 30019186 | AA_A_145_30019186 | 1.0029 | 0.993 | H | 0.35 | 0.29 | R | 1 | 9.56E-07 | 1.32 ( 1.18- 1.47) |
| 30019201 | AA_A_150_30019201 | 0.9861 | 1 | V | 0.04 | 0.04 | A | 1 | 2.45E-01 | 0.85 ( 0.65- 1.11) |
| 30019204 | AA_A_151_30019204 | 0.9885 | 0.997 | R | 0.20 | 0.30 | H | 1 | 1.71E-18 | 0.57 ( 0.51- 0.65) |
| 30019207 | AA_A_152_30019207_A | 1.0272 | 0.998 | P | 0.22 | 0.19 | A | 1 | 7.59E-03 | 1.19 ( 1.05- 1.34) |
| 30019207 | AA_A_152_30019207_E | 0.838 | 0.802 | P | 0.10 | 0.09 | A | 1 | 2.67E-01 | 1.1 ( 0.93- 1.31) |
| 30019207 | AA_A_152_30019207_V | 0.9391 | 0.921 | P | 0.61 | 0.60 | A | 1 | 4.17E-01 | 1.04 ( 0.94- 1.16) |
| 30019207 | AA_A_152_30019207_W | 1.0263 | 0.994 | P | 0.07 | 0.11 | A | 1 | 6.80E-10 | 0.56 ( 0.47- 0.67) |
| 30019219 | AA_A_156_30019219_L | 0.9609 | 0.921 | P | 0.56 | 0.60 | A | 1 | 3.75E-03 | 0.86 ( 0.78- 0.95) |
| 30019219 | AA_A_156_30019219_Q | 1.0265 | 0.986 | P | 0.33 | 0.30 | A | 1 | 3.57E-03 | 1.18 ( 1.05- 1.31) |
| 30019219 | AA_A_156_30019219_R | 0.9814 | 0.995 | P | 0.04 | 0.04 | A | 1 | 2.45E-01 | 0.85 ( 0.65- 1.11) |
| 30019225 | AA_A_158_30019225 | 0.9861 | 1 | V | 0.04 | 0.04 | A | 1 | 2.45E-01 | 0.85 ( 0.65- 1.11) |
| 30019234 | AA_A_161_30019234 | 0.9787 | 0.995 | D | 0.04 | 0.04 | E | 1 | 8.44E-01 | 0.97 ( 0.75- 1.27) |
| 30019240 | AA_A_163_30019240_R | 1.0131 | 0.994 | P | 0.26 | 0.22 | A | 1 | 2.90E-03 | 1.2 ( 1.06- 1.35) |
| 30019240 | AA_A_163_30019240_T | 1.0124 | 0.993 | P | 0.74 | 0.78 | A | 1 | 2.90E-03 | 0.83 ( 0.74- 0.94) |
| 30019249 | AA_A_166_30019249 | 0.9858 | 0.989 | D | 0.19 | 0.19 | E | 1 | 8.39E-01 | 0.99 ( 0.86- 1.13) |
| 30019252 | AA_A_167_30019252 | 0.9858 | 0.989 | G | 0.19 | 0.19 | W | 1 | 8.39E-01 | 0.99 ( 0.86- 1.13) |
| 30019881 | AA_A_184_30019881_A | 1.0044 | 0.989 | P | 0.42 | 0.36 | A | 1 | 9.08E-07 | 1.3 ( 1.17- 1.45) |
| 30019881 | AA_A_184_30019881_P | 1.0039 | 0.989 | P | 0.58 | 0.64 | A | 1 | 9.08E-07 | 0.77 ( 0.69- 0.85) |
| 30019908 | AA_A_193_30019908_A | 1.0128 | 0.989 | P | 0.52 | 0.51 | A | 1 | 1.66E-01 | 1.07 ( 0.97- 1.19) |
| 30019908 | AA_A_193_30019908_P | 1.0125 | 0.99 | P | 0.48 | 0.49 | A | 1 | 1.66E-01 | 0.93 ( 0.84- 1.03) |
| 30019911 | AA_A_194_30019911_I | 1.0125 | 0.99 | P | 0.48 | 0.49 | A | 1 | 1.66E-01 | 0.93 ( 0.84- 1.03) |
| 30019911 | AA_A_194_30019911_V | 1.0122 | 0.989 | P | 0.52 | 0.51 | A | 1 | 1.66E-01 | 1.07 ( 0.97- 1.19) |
| 30019950 | AA_A_207_30019950_G | 1.0127 | 0.99 | P | 0.48 | 0.49 | A | 1 | 1.66E-01 | 0.93 ( 0.84- 1.03) |
| 30019950 | AA_A_207_30019950_S | 1.0125 | 0.989 | P | 0.52 | 0.51 | A | 1 | 1.66E-01 | 1.07 ( 0.97- 1.19) |
| 30019970 | HLA_A_01 | 0.9861 | 1 | P | 0.04 | 0.04 | A | 1 | 2.45E-01 | 0.85 ( 0.65- 1.11) |
| 30019970 | HLA_A_0101 | 0.9861 | 1 | P | 0.04 | 0.04 | A | 1 | 2.45E-01 | 0.85 ( 0.65- 1.11) |
| 30019970 | HLA_A_02 | 0.9978 | 0.989 | P | 0.34 | 0.28 | A | 1 | 3.74E-07 | 1.33 ( 1.19- 1.49) |
| 30019970 | HLA_A_0206 | 0.9885 | 0.991 | P | 0.08 | 0.07 | A | 1 | 1.71E-01 | 1.14 ( 0.94- 1.39) |
| 30019970 | HLA_A_0207 | 0.904 | 0.903 | P | 0.10 | 0.05 | A | 1 | 2.07E-12 | 2.13 ( 1.72- 2.62) |
| 30019970 | HLA_A_03 | 0.9815 | 0.997 | P | 0.04 | 0.04 | A | 1 | 8.44E-01 | 0.97 ( 0.75- 1.27) |
| 30019970 | HLA_A_0301 | 0.9617 | 0.977 | P | 0.04 | 0.04 | A | 1 | 8.44E-01 | 0.97 ( 0.75- 1.27) |
| 30019970 | HLA_A_11 | 1.0305 | 0.997 | P | 0.18 | 0.15 | A | 1 | 1.06E-03 | 1.25 ( 1.10- 1.44) |
| 30019970 | HLA_A_1101 | 1.0292 | 0.994 | P | 0.17 | 0.14 | A | 1 | 3.61E-03 | 1.23 ( 1.07- 1.41) |
| 30019970 | HLA_A_1102 | 0.9564 | 0.959 | P | 0.01 | 0.01 | A | 1 | 1.05E-01 | 1.53 ( 0.92- 2.55) |
| 30019970 | HLA_A_24 | 0.9998 | 0.987 | P | 0.15 | 0.15 | A | 1 | 7.37E-01 | 1.03 ( 0.89- 1.18) |
| 30019970 | HLA_A_2402 | 0.9611 | 0.945 | P | 0.15 | 0.14 | A | 1 | 5.24E-01 | 1.05 ( 0.91- 1.21) |
| 30019970 | HLA_A_26 | 0.9833 | 0.983 | P | 0.04 | 0.03 | A | 1 | 1.06E-01 | 1.26 ( 0.95- 1.68) |
| 30019970 | HLA_A_2601 | 0.9909 | 0.992 | P | 0.04 | 0.03 | A | 1 | 1.05E-01 | 1.27 ( 0.95- 1.69) |
| 30019970 | HLA_A_29 | 0.9791 | 0.992 | P | 0.01 | 0.01 | A | 1 | 5.95E-01 | 1.13 ( 0.73- 1.75) |
| 30019970 | HLA_A_30 | 1.0256 | 0.993 | P | 0.07 | 0.11 | A | 1 | 1.24E-09 | 0.57 ( 0.47- 0.68) |
| 30019970 | HLA_A_3001 | 1.0256 | 0.993 | P | 0.07 | 0.11 | A | 1 | 1.24E-09 | 0.57 ( 0.47- 0.68) |
| 30019970 | HLA_A_31 | 0.9888 | 0.994 | P | 0.03 | 0.05 | A | 1 | 1.90E-02 | 0.73 ( 0.56- 0.95) |
| 30019970 | HLA_A_3101 | 0.9915 | 0.998 | P | 0.03 | 0.05 | A | 1 | 1.90E-02 | 0.73 ( 0.56- 0.95) |
| 30019970 | HLA_A_32 | 1.0003 | 0.999 | P | 0.01 | 0.02 | A | 1 | 1.47E-02 | 0.61 ( 0.41- 0.91) |
| 30019970 | HLA_A_3201 | 1.0003 | 1 | P | 0.01 | 0.02 | A | 1 | 1.47E-02 | 0.61 ( 0.41- 0.91) |
| 30019970 | HLA_A_33 | 1.0135 | 0.995 | P | 0.07 | 0.10 | A | 1 | 1.58E-05 | 0.66 ( 0.55- 0.80) |
| 30019970 | HLA_A_3303 | 1.0191 | 1 | P | 0.07 | 0.10 | A | 1 | 7.96E-06 | 0.65 ( 0.54- 0.79) |
| 30019970 | HLA_A_68 | 0.9802 | 0.994 | P | 0.01 | 0.01 | A | 1 | 4.62E-01 | 0.83 ( 0.50- 1.37) |
| 30019970 | HLA_A_6801 | 0.9879 | 0.996 | P | 0.01 | 0.01 | A | 1 | 4.62E-01 | 0.83 ( 0.50- 1.37) |
| 30020064 | AA_A_245_30020064_A | 0.954 | 0.958 | P | 0.99 | 0.99 | A | 1 | 4.62E-01 | 1.21 ( 0.73- 2.01) |
| 30020064 | AA_A_245_30020064_V | 0.9879 | 0.996 | P | 0.01 | 0.01 | A | 1 | 4.62E-01 | 0.83 ( 0.50- 1.37) |
| 30020067 | AA_A_246_30020067_A | 0.9731 | 0.995 | P | 0.83 | 0.79 | A | 1 | 2.70E-05 | 1.33 ( 1.16- 1.52) |
| 30020067 | AA_A_246_30020067_S | 0.9739 | 0.996 | P | 0.17 | 0.21 | A | 1 | 2.70E-05 | 0.75 ( 0.66- 0.86) |
| 30020088 | AA_A_253_30020088_E | 1.0136 | 0.992 | P | 0.48 | 0.49 | A | 1 | 1.83E-01 | 0.93 ( 0.84- 1.03) |
| 30020088 | AA_A_253_30020088_Q | 1.0139 | 0.992 | P | 0.52 | 0.51 | A | 1 | 1.83E-01 | 1.07 ( 0.97- 1.19) |
| 30020259 | AA_A_276_30020259_L | 1.0057 | 0.996 | P | 0.33 | 0.35 | A | 1 | 8.54E-02 | 0.91 ( 0.82- 1.01) |
| 30020259 | AA_A_276_30020259_P | 1.0076 | 0.997 | P | 0.67 | 0.65 | A | 1 | 8.54E-02 | 1.1 ( 0.99- 1.22) |
| 30020277 | AA_A_282_30020277_I | 0.9948 | 0.982 | P | 0.85 | 0.85 | A | 1 | 6.82E-01 | 0.97 ( 0.84- 1.12) |
| 30020277 | AA_A_282_30020277_V | 1.0015 | 0.988 | P | 0.15 | 0.15 | A | 1 | 6.82E-01 | 1.03 ( 0.89- 1.19) |
| 30020313 | AA_A_294_30020313_F | 1.0135 | 0.992 | P | 0.52 | 0.51 | A | 1 | 1.83E-01 | 1.07 ( 0.97- 1.19) |
| 30020313 | AA_A_294_30020313_L | 1.0123 | 0.991 | P | 0.48 | 0.49 | A | 1 | 1.83E-01 | 0.93 ( 0.84- 1.03) |
| 30020322 | AA_A_297_30020322_M | 1.0003 | 0.999 | P | 0.01 | 0.02 | A | 1 | 1.47E-02 | 0.61 ( 0.41- 0.91) |
| 30020322 | AA_A_297_30020322_V | 0.9796 | 0.977 | P | 0.99 | 0.98 | A | 1 | 1.47E-02 | 1.64 ( 1.10- 2.43) |
| 30020325 | AA_A_298_30020325_F | 0.9744 | 0.998 | P | 0.13 | 0.18 | A | 1 | 7.17E-08 | 0.67 ( 0.58- 0.78) |
| 30020325 | AA_A_298_30020325_I | 0.9716 | 0.995 | P | 0.87 | 0.82 | A | 1 | 7.17E-08 | 1.49 ( 1.29- 1.72) |
| 30020328 | AA_A_299_30020328_A | 0.9744 | 0.996 | P | 0.17 | 0.21 | A | 1 | 2.70E-05 | 0.75 ( 0.66- 0.86) |
| 30020328 | AA_A_299_30020328_T | 0.9721 | 0.994 | P | 0.83 | 0.79 | A | 1 | 2.70E-05 | 1.33 ( 1.16- 1.52) |
| 30020352 | AA_A_307_30020352_M | 0.9715 | 0.995 | P | 0.87 | 0.82 | A | 1 | 7.17E-08 | 1.49 ( 1.29- 1.72) |
| 30020352 | AA_A_307_30020352_R | 0.9744 | 0.998 | P | 0.13 | 0.18 | A | 1 | 7.17E-08 | 0.67 ( 0.58- 0.78) |
| 30020364 | AA_A_311_30020364_K | 0.9982 | 0.985 | P | 0.85 | 0.85 | A | 1 | 6.82E-01 | 0.97 ( 0.84- 1.12) |
| 30020364 | AA_A_311_30020364_N | 1.0001 | 0.987 | P | 0.15 | 0.15 | A | 1 | 6.82E-01 | 1.03 ( 0.89- 1.19) |
| 30020836 | AA_A_321_30020836_S | 1.0073 | 0.997 | P | 0.67 | 0.65 | A | 1 | 8.54E-02 | 1.1 ( 0.99- 1.22) |
| 30020836 | AA_A_321_30020836_T | 1.0057 | 0.996 | P | 0.33 | 0.35 | A | 1 | 8.54E-02 | 0.91 ( 0.82- 1.01) |
| 30021017 | AA_A_334_30021017_M | 0.9745 | 0.996 | P | 0.17 | 0.21 | A | 1 | 2.70E-05 | 0.75 ( 0.66- 0.86) |
| 30021017 | AA_A_334_30021017_V | 0.9721 | 0.994 | P | 0.83 | 0.79 | A | 1 | 2.70E-05 | 1.33 ( 1.16- 1.52) |
| 31345102 | AA_C_339_31345102_A | 0.9639 | 0.978 | P | 0.86 | 0.83 | A | 1 | 7.64E-03 | 1.22 ( 1.05- 1.40) |
| 31345102 | AA_C_339_31345102_T | 0.9702 | 0.982 | P | 0.14 | 0.17 | A | 1 | 1.04E-02 | 0.83 ( 0.72- 0.96) |
| 31345141 | AA_C_326_31345141_C | 0.9698 | 0.982 | P | 0.14 | 0.17 | A | 1 | 9.37E-03 | 0.83 ( 0.72- 0.95) |
| 31345141 | AA_C_326_31345141_S | 0.9655 | 0.979 | P | 0.86 | 0.83 | A | 1 | 7.65E-03 | 1.22 ( 1.05- 1.40) |
| 31345745 | AA_C_307_31345745_M | 0.9692 | 0.981 | P | 0.14 | 0.17 | A | 1 | 9.37E-03 | 0.83 ( 0.72- 0.95) |
| 31345745 | AA_C_307_31345745_V | 0.9645 | 0.978 | P | 0.86 | 0.83 | A | 1 | 6.18E-03 | 1.22 ( 1.06- 1.41) |
| 31345748 | AA_C_306_31345748_A | 0.9699 | 0.982 | P | 0.14 | 0.17 | A | 1 | 9.37E-03 | 0.83 ( 0.72- 0.95) |
| 31345748 | AA_C_306_31345748_V | 0.9654 | 0.979 | P | 0.86 | 0.83 | A | 1 | 7.65E-03 | 1.22 ( 1.05- 1.40) |
| 31345751 | AA_C_305_31345751_A | 0.9655 | 0.979 | P | 0.86 | 0.83 | A | 1 | 7.65E-03 | 1.22 ( 1.05- 1.40) |
| 31345751 | AA_C_305_31345751_T | 0.9704 | 0.982 | P | 0.14 | 0.17 | A | 1 | 9.37E-03 | 0.83 ( 0.72- 0.95) |
| 31345754 | AA_C_304_31345754_M | 0.9963 | 0.987 | P | 0.32 | 0.38 | A | 1 | 5.31E-06 | 0.78 ( 0.70- 0.87) |
| 31345754 | AA_C_304_31345754_V | 0.9974 | 0.988 | P | 0.68 | 0.62 | A | 1 | 4.26E-06 | 1.29 ( 1.16- 1.43) |
| 31345757 | AA_C_303_31345757_M | 1.0031 | 0.997 | P | 0.05 | 0.06 | A | 1 | 1.41E-01 | 0.84 ( 0.67- 1.06) |
| 31345757 | AA_C_303_31345757_V | 0.9807 | 0.968 | P | 0.95 | 0.94 | A | 1 | 1.01E-01 | 1.21 ( 0.96- 1.52) |
| 31345781 | AA_C_295_31345781_A | 0.9651 | 0.979 | P | 0.86 | 0.83 | A | 1 | 7.65E-03 | 1.22 ( 1.05- 1.40) |
| 31345781 | AA_C_295_31345781_V | 0.9696 | 0.982 | P | 0.14 | 0.17 | A | 1 | 9.37E-03 | 0.83 ( 0.72- 0.95) |
| 31345811 | AA_C_285_31345811_M | 0.9703 | 0.982 | P | 0.14 | 0.17 | A | 1 | 9.37E-03 | 0.83 ( 0.72- 0.95) |
| 31345811 | AA_C_285_31345811_V | 0.9658 | 0.979 | P | 0.86 | 0.83 | A | 1 | 7.65E-03 | 1.22 ( 1.05- 1.40) |
| 31345841 | AA_C_275_31345841_E | 0.9814 | 0.984 | P | 0.85 | 0.83 | A | 1 | 1.88E-01 | 1.1 ( 0.96- 1.26) |
| 31345841 | AA_C_275_31345841_G | 0.9794 | 0.997 | P | 0.10 | 0.11 | A | 1 | 5.22E-01 | 0.95 ( 0.80- 1.12) |
| 31345841 | AA_C_275_31345841_K | 0.9962 | 0.997 | P | 0.05 | 0.06 | A | 1 | 2.52E-01 | 0.88 ( 0.70- 1.10) |
| 31345971 | AA_C_273_31345971_R | 0.9645 | 0.978 | P | 0.86 | 0.83 | A | 1 | 7.65E-03 | 1.22 ( 1.05- 1.40) |
| 31345971 | AA_C_273_31345971_S | 0.9695 | 0.982 | P | 0.14 | 0.17 | A | 1 | 9.37E-03 | 0.83 ( 0.72- 0.95) |
| 31345989 | AA_C_267_31345989_P | 0.9644 | 0.978 | P | 0.86 | 0.83 | A | 1 | 7.65E-03 | 1.22 ( 1.05- 1.40) |
| 31345989 | AA_C_267_31345989_Q | 0.9695 | 0.981 | P | 0.14 | 0.17 | A | 1 | 9.37E-03 | 0.83 ( 0.72- 0.95) |
| 31346007 | AA_C_261_31346007_M | 0.9696 | 0.982 | P | 0.14 | 0.17 | A | 1 | 9.37E-03 | 0.83 ( 0.72- 0.95) |
| 31346007 | AA_C_261_31346007_V | 0.9645 | 0.978 | P | 0.86 | 0.83 | A | 1 | 7.65E-03 | 1.22 ( 1.05- 1.40) |
| 31346031 | AA_C_253_31346031_E | 0.9639 | 0.978 | P | 0.86 | 0.83 | A | 1 | 7.65E-03 | 1.22 ( 1.05- 1.40) |
| 31346031 | AA_C_253_31346031_Q | 0.9695 | 0.982 | P | 0.14 | 0.17 | A | 1 | 9.37E-03 | 0.83 ( 0.72- 0.95) |
| 31346046 | AA_C_248_31346046_M | 1.0191 | 0.995 | P | 0.18 | 0.11 | A | 1 | 5.40E-15 | 1.82 ( 1.56- 2.11) |
| 31346046 | AA_C_248_31346046_V | 1.0113 | 0.984 | P | 0.82 | 0.89 | A | 1 | 1.08E-14 | 0.56 ( 0.48- 0.65) |
| 31346133 | AA_C_219_31346133_R | 1.0503 | 0.992 | P | 0.46 | 0.54 | A | 1 | 1.35E-09 | 0.73 ( 0.66- 0.81) |
| 31346133 | AA_C_219_31346133_W | 1.0541 | 0.998 | P | 0.54 | 0.46 | A | 1 | 1.02E-09 | 1.37 ( 1.24- 1.51) |
| 31346171 | HLA_C_01 | 1.0182 | 0.994 | P | 0.18 | 0.11 | A | 1 | 5.40E-15 | 1.82 ( 1.56- 2.11) |
| 31346171 | HLA_C_0102 | 1.0193 | 0.995 | P | 0.18 | 0.11 | A | 1 | 5.40E-15 | 1.82 ( 1.56- 2.11) |
| 31346171 | HLA_C_03 | 1.002 | 0.997 | P | 0.24 | 0.22 | A | 1 | 1.43E-01 | 1.1 ( 0.97- 1.24) |
| 31346171 | HLA_C_0302 | 0.9941 | 0.996 | P | 0.04 | 0.05 | A | 1 | 5.81E-02 | 0.79 ( 0.62- 1.01) |
| 31346171 | HLA_C_0303 | 0.9709 | 0.986 | P | 0.10 | 0.09 | A | 1 | 7.89E-02 | 1.17 ( 0.98- 1.40) |
| 31346171 | HLA_C_0304 | 0.972 | 0.979 | P | 0.09 | 0.08 | A | 1 | 7.09E-02 | 1.18 ( 0.99- 1.42) |
| 31346171 | HLA_C_04 | 0.9975 | 0.998 | P | 0.05 | 0.06 | A | 1 | 2.52E-01 | 0.88 ( 0.70- 1.10) |
| 31346171 | HLA_C_0401 | 1.0047 | 0.999 | P | 0.05 | 0.06 | A | 1 | 1.41E-01 | 0.84 ( 0.67- 1.06) |
| 31346171 | HLA_C_06 | 1.0311 | 0.995 | P | 0.09 | 0.15 | A | 1 | 6.02E-13 | 0.55 ( 0.47- 0.65) |
| 31346171 | HLA_C_0602 | 1.0311 | 0.995 | P | 0.09 | 0.15 | A | 1 | 6.02E-13 | 0.55 ( 0.47- 0.65) |
| 31346171 | HLA_C_07 | 0.9649 | 0.976 | P | 0.14 | 0.17 | A | 1 | 9.37E-03 | 0.83 ( 0.72- 0.95) |
| 31346171 | HLA_C_0701 | 0.8906 | 0.876 | P | 0.01 | 0.02 | A | 1 | 2.88E-03 | 0.54 ( 0.36- 0.81) |
| 31346171 | HLA_C_0702 | 0.972 | 0.976 | P | 0.12 | 0.13 | A | 1 | 1.38E-01 | 0.89 ( 0.76- 1.04) |
| 31346171 | HLA_C_08 | 0.9764 | 0.994 | P | 0.10 | 0.11 | A | 1 | 5.22E-01 | 0.95 ( 0.80- 1.12) |
| 31346171 | HLA_C_0801 | 0.9382 | 0.954 | P | 0.10 | 0.11 | A | 1 | 5.22E-01 | 0.95 ( 0.80- 1.12) |
| 31346171 | HLA_C_12 | 0.9436 | 0.938 | P | 0.08 | 0.07 | A | 1 | 3.15E-01 | 1.11 ( 0.91- 1.35) |
| 31346171 | HLA_C_1202 | 1.0295 | 0.997 | P | 0.04 | 0.03 | A | 1 | 6.97E-01 | 1.06 ( 0.80- 1.39) |
| 31346171 | HLA_C_1203 | 0.9545 | 0.933 | P | 0.04 | 0.04 | A | 1 | 3.27E-01 | 1.14 ( 0.88- 1.49) |
| 31346171 | HLA_C_14 | 1.0435 | 0.999 | P | 0.07 | 0.07 | A | 1 | 9.00E-01 | 0.99 ( 0.81- 1.21) |
| 31346171 | HLA_C_1402 | 1.048 | 0.999 | P | 0.06 | 0.04 | A | 1 | 8.52E-03 | 1.37 ( 1.08- 1.73) |
| 31346171 | HLA_C_1403 | 0.9917 | 0.99 | P | 0.01 | 0.03 | A | 1 | 1.81E-05 | 0.4 ( 0.27- 0.61) |
| 31346171 | HLA_C_15 | 0.8955 | 0.835 | P | 0.04 | 0.03 | A | 1 | 4.11E-01 | 1.12 ( 0.85- 1.49) |
| 31346171 | HLA_C_1502 | 0.983 | 0.986 | P | 0.04 | 0.03 | A | 1 | 4.11E-01 | 1.12 ( 0.85- 1.49) |
| 31346208 | AA_C_194_31346208_L | 0.9701 | 0.982 | P | 0.14 | 0.17 | A | 1 | 9.37E-03 | 0.83 ( 0.72- 0.95) |
| 31346208 | AA_C_194_31346208_V | 0.9566 | 0.963 | P | 0.86 | 0.83 | A | 1 | 9.37E-03 | 1.21 ( 1.05- 1.40) |
| 31346238 | AA_C_184_31346238_H | 0.9567 | 0.963 | P | 0.86 | 0.83 | A | 1 | 9.37E-03 | 1.21 ( 1.05- 1.40) |
| 31346238 | AA_C_184_31346238_P | 0.9705 | 0.982 | P | 0.14 | 0.17 | A | 1 | 9.37E-03 | 0.83 ( 0.72- 0.95) |
| 31346846 | AA_C_177_31346846 | 0.9938 | 0.994 | K | 0.11 | 0.12 | E | 1 | 4.56E-01 | 0.94 ( 0.80- 1.11) |
| 31346858 | AA_C_173_31346858 | 1.001 | 0.997 | K | 0.24 | 0.22 | E | 1 | 1.43E-01 | 1.1 ( 0.97- 1.24) |
| 31346888 | AA_C_163_31346888_L | 1.0019 | 0.997 | P | 0.24 | 0.22 | A | 1 | 1.43E-01 | 1.1 ( 0.97- 1.24) |
| 31346888 | AA_C_163_31346888_T | 0.9972 | 0.993 | P | 0.76 | 0.78 | A | 1 | 1.43E-01 | 0.91 ( 0.81- 1.03) |
| 31346909 | AA_C_156_31346909_L | 0.9774 | 0.976 | P | 0.52 | 0.53 | A | 1 | 5.02E-01 | 0.97 ( 0.87- 1.07) |
| 31346909 | AA_C_156_31346909_R | 1.0165 | 0.983 | P | 0.30 | 0.24 | A | 1 | 2.10E-08 | 1.39 ( 1.24- 1.56) |
| 31346909 | AA_C_156_31346909_W | 1.0002 | 0.983 | P | 0.17 | 0.22 | A | 1 | 7.37E-08 | 0.7 ( 0.61- 0.80) |
| 31346921 | AA_C_152_31346921_A | 0.9733 | 0.981 | P | 0.14 | 0.17 | A | 1 | 1.17E-02 | 0.83 ( 0.72- 0.96) |
| 31346921 | AA_C_152_31346921_E | 1.0239 | 0.988 | P | 0.76 | 0.73 | A | 1 | 1.35E-02 | 1.16 ( 1.03- 1.30) |
| 31346921 | AA_C_152_31346921_T | 0.981 | 0.998 | P | 0.10 | 0.11 | A | 1 | 5.22E-01 | 0.95 ( 0.80- 1.12) |
| 31346936 | AA_C_147_31346936 | 0.9707 | 0.982 | L | 0.14 | 0.16 | W | 1 | 1.13E-02 | 0.83 ( 0.72- 0.96) |
| 31347029 | AA_C_116_31347029_F | 0.9942 | 0.986 | P | 0.17 | 0.19 | A | 1 | 1.73E-01 | 0.91 ( 0.80- 1.04) |
| 31347029 | AA_C_116_31347029_L | 0.9874 | 0.991 | P | 0.04 | 0.03 | A | 1 | 4.11E-01 | 1.12 ( 0.85- 1.49) |
| 31347029 | AA_C_116_31347029_S | 0.9915 | 0.992 | P | 0.41 | 0.50 | A | 1 | 4.10E-12 | 0.69 ( 0.62- 0.77) |
| 31347029 | AA_C_116_31347029_Y | 1.027 | 0.997 | P | 0.38 | 0.28 | A | 1 | 1.15E-15 | 1.57 ( 1.41- 1.75) |
| 31347035 | AA_C_114_31347035 | 0.9893 | 0.994 | N | 0.16 | 0.17 | D | 1 | 2.57E-01 | 0.92 ( 0.80- 1.06) |
| 31347038 | AA_C_113_31347038 | 0.9573 | 0.964 | H | 0.05 | 0.05 | Y | 1 | 6.10E-01 | 1.07 ( 0.84- 1.36) |
| 31347068 | AA_C_103_31347068 | 1.0011 | 0.996 | V | 0.24 | 0.22 | L | 1 | 1.43E-01 | 1.1 ( 0.97- 1.24) |
| 31347080 | AA_C_99_31347080_C | 1.0209 | 0.998 | P | 0.19 | 0.11 | A | 1 | 4.67E-15 | 1.81 ( 1.56- 2.11) |
| 31347080 | AA_C_99_31347080_F | 1.0365 | 1 | P | 0.12 | 0.13 | A | 1 | 3.79E-01 | 0.93 ( 0.80- 1.09) |
| 31347080 | AA_C_99_31347080_S | 0.9722 | 0.976 | P | 0.12 | 0.13 | A | 1 | 1.38E-01 | 0.89 ( 0.76- 1.04) |
| 31347080 | AA_C_99_31347080_Y | 0.9575 | 0.988 | P | 0.57 | 0.63 | A | 1 | 2.02E-05 | 0.79 ( 0.71- 0.88) |
| 31347086 | AA_C_97_31347086 | 0.9902 | 0.988 | W | 0.38 | 0.37 | R | 1 | 2.31E-01 | 1.07 ( 0.96- 1.19) |
| 31347092 | AA_C_95_31347092_I | 0.9719 | 0.987 | P | 0.24 | 0.21 | A | 1 | 7.64E-03 | 1.18 ( 1.05- 1.34) |
| 31347092 | AA_C_95_31347092_L | 0.9805 | 0.988 | P | 0.75 | 0.78 | A | 1 | 1.15E-02 | 0.86 ( 0.76- 0.97) |
| 31347095 | AA_C_94_31347095 | 0.9817 | 0.989 | I | 0.28 | 0.27 | T | 1 | 1.10E-01 | 1.1 ( 0.98- 1.23) |
| 31347104 | AA_C_91_31347104 | 0.9703 | 0.986 | R | 0.10 | 0.09 | G | 1 | 7.89E-02 | 1.17 ( 0.98- 1.40) |
| 31347357 | AA_C_90_31347357 | 1.0121 | 0.991 | D | 0.28 | 0.37 | A | 1 | 7.10E-14 | 0.66 ( 0.59- 0.73) |
| 31347387 | AA_C_80_31347387 | 1.0086 | 0.983 | K | 0.19 | 0.26 | N | 1 | 1.59E-09 | 0.68 ( 0.60- 0.77) |
| 31347396 | AA_C_77_31347396 | 1.0086 | 0.983 | N | 0.19 | 0.26 | S | 1 | 1.59E-09 | 0.68 ( 0.60- 0.77) |
| 31347408 | AA_C_73_31347408 | 0.9831 | 0.969 | T | 0.64 | 0.55 | A | 1 | 1.35E-11 | 1.44 ( 1.30- 1.60) |
| 31347429 | AA_C_66_31347429 | 0.9534 | 0.954 | N | 0.06 | 0.07 | K | 1 | 2.03E-01 | 0.87 ( 0.71- 1.08) |
| 31347480 | AA_C_49_31347480 | 1.0035 | 0.998 | E | 0.05 | 0.06 | A | 1 | 1.41E-01 | 0.84 ( 0.67- 1.06) |
| 31347522 | AA_C_35_31347522 | 0.9772 | 0.993 | Q | 0.10 | 0.11 | R | 1 | 4.95E-01 | 0.94 ( 0.80- 1.12) |
| 31347555 | AA_C_24_31347555 | 0.9774 | 0.992 | S | 0.41 | 0.43 | A | 1 | 3.14E-01 | 0.95 ( 0.85- 1.05) |
| 31347564 | AA_C_21_31347564 | 0.9744 | 0.958 | H | 0.30 | 0.29 | R | 1 | 7.06E-01 | 1.02 ( 0.91- 1.14) |
| 31347585 | AA_C_14_31347585 | 1.0053 | 0.999 | W | 0.05 | 0.06 | R | 1 | 1.41E-01 | 0.84 ( 0.67- 1.06) |
| 31347594 | AA_C_11_31347594 | 1.0272 | 0.999 | S | 0.30 | 0.23 | A | 1 | 3.00E-08 | 1.39 ( 1.24- 1.56) |
| 31347600 | AA_C_9_31347600_D | 1.0205 | 0.994 | P | 0.23 | 0.32 | A | 1 | 1.99E-13 | 0.65 ( 0.58- 0.73) |
| 31347600 | AA_C_9_31347600_F | 1.0211 | 0.998 | P | 0.19 | 0.11 | A | 1 | 4.67E-15 | 1.81 ( 1.56- 2.11) |
| 31347600 | AA_C_9_31347600_S | 1.0436 | 0.999 | P | 0.12 | 0.12 | A | 1 | 2.96E-01 | 0.92 ( 0.79- 1.08) |
| 31347600 | AA_C_9_31347600_Y | 0.9557 | 0.994 | P | 0.47 | 0.45 | A | 1 | 8.54E-02 | 1.1 ( 0.99- 1.22) |
| 31347609 | AA_C_6_31347609 | 1.021 | 0.998 | K | 0.19 | 0.11 | R | 1 | 4.67E-15 | 1.81 ( 1.56- 2.11) |
| 31347624 | AA_C_1_31347624_C | 0.9914 | 0.988 | P | 0.71 | 0.72 | A | 1 | 4.01E-01 | 0.95 ( 0.85- 1.07) |
| 31347624 | AA_C_1_31347624_G | 1.0013 | 0.999 | P | 0.29 | 0.28 | A | 1 | 3.86E-01 | 1.05 ( 0.94- 1.18) |
| 31347781 | AA_C_-9_31347781_A | 0.9711 | 0.982 | P | 0.86 | 0.84 | A | 1 | 9.10E-03 | 1.21 ( 1.05- 1.40) |
| 31347781 | AA_C_-9_31347781_G | 0.9867 | 1 | P | 0.14 | 0.16 | A | 1 | 9.10E-03 | 0.83 ( 0.71- 0.95) |
| 31347799 | AA_C_-15_31347799_I | 0.9832 | 0.982 | P | 0.81 | 0.79 | A | 1 | 4.21E-02 | 1.14 ( 1.01- 1.30) |
| 31347799 | AA_C_-15_31347799_L | 0.9859 | 0.986 | P | 0.19 | 0.21 | A | 1 | 4.21E-02 | 0.88 ( 0.77- 1.00) |
| 31347805 | AA_C_-17_31347805_A | 0.9868 | 1 | P | 0.14 | 0.16 | A | 1 | 9.10E-03 | 0.83 ( 0.71- 0.95) |
| 31347805 | AA_C_-17_31347805_T | 0.9866 | 0.999 | P | 0.86 | 0.84 | A | 1 | 9.10E-03 | 1.21 ( 1.05- 1.40) |
| 31430282 | AA_B_325_31430282_C | 1.0068 | 0.986 | P | 0.38 | 0.46 | A | 1 | 4.12E-11 | 0.7 ( 0.63- 0.78) |
| 31430282 | AA_B_325_31430282_S | 1.0066 | 0.986 | P | 0.62 | 0.54 | A | 1 | 4.85E-11 | 1.42 ( 1.28- 1.58) |
| 31430889 | AA_B_305_31430889_A | 0.9928 | 0.987 | P | 0.43 | 0.51 | A | 1 | 8.38E-11 | 0.71 ( 0.64- 0.79) |
| 31430889 | AA_B_305_31430889_T | 0.9923 | 0.987 | P | 0.57 | 0.49 | A | 1 | 9.81E-11 | 1.41 ( 1.27- 1.57) |
| 31430958 | AA_B_282_31430958_I | 0.9909 | 0.987 | P | 0.58 | 0.50 | A | 1 | 9.47E-11 | 1.41 ( 1.27- 1.57) |
| 31430958 | AA_B_282_31430958_V | 0.991 | 0.987 | P | 0.42 | 0.50 | A | 1 | 8.09E-11 | 0.71 ( 0.64- 0.79) |
| 31431162 | AA_B_245_31431162_A | 0.9765 | 0.961 | P | 0.97 | 0.96 | A | 1 | 2.34E-01 | 1.19 ( 0.89- 1.59) |
| 31431162 | AA_B_245_31431162_T | 0.9816 | 0.968 | P | 0.03 | 0.04 | A | 1 | 2.64E-01 | 0.85 ( 0.63- 1.13) |
| 31431264 | AA_B_211_31431264_A | 0.9437 | 0.94 | P | 0.98 | 0.98 | A | 1 | 1.74E-01 | 1.28 ( 0.90- 1.83) |
| 31431264 | AA_B_211_31431264_G | 0.9673 | 0.962 | P | 0.02 | 0.02 | A | 1 | 1.46E-01 | 0.77 ( 0.54- 1.10) |
| 31431272 | HLA_B_07 | 0.9843 | 0.995 | P | 0.03 | 0.04 | A | 1 | 1.01E-02 | 0.7 ( 0.53- 0.92) |
| 31431272 | HLA_B_0702 | 0.9931 | 0.993 | P | 0.02 | 0.03 | A | 1 | 2.83E-03 | 0.61 ( 0.44- 0.84) |
| 31431272 | HLA_B_0705 | 0.9767 | 0.986 | P | 0.01 | 0.01 | A | 1 | 8.77E-01 | 0.96 ( 0.59- 1.57) |
| 31431272 | HLA_B_08 | 1.0297 | 0.989 | P | 0.01 | 0.01 | A | 1 | 8.11E-01 | 0.95 ( 0.61- 1.47) |
| 31431272 | HLA_B_0801 | 1.0297 | 0.989 | P | 0.01 | 0.01 | A | 1 | 8.11E-01 | 0.95 ( 0.61- 1.47) |
| 31431272 | HLA_B_13 | 1.0271 | 0.988 | P | 0.10 | 0.15 | A | 1 | 4.68E-08 | 0.65 ( 0.56- 0.76) |
| 31431272 | HLA_B_1301 | 0.9638 | 0.993 | P | 0.04 | 0.03 | A | 1 | 6.98E-02 | 1.29 ( 0.98- 1.69) |
| 31431272 | HLA_B_1302 | 1.0387 | 0.984 | P | 0.06 | 0.12 | A | 1 | 9.96E-14 | 0.49 ( 0.41- 0.59) |
| 31431272 | HLA_B_15 | 0.9496 | 0.917 | P | 0.12 | 0.13 | A | 1 | 1.94E-01 | 0.9 ( 0.77- 1.05) |
| 31431272 | HLA_B_1501 | 0.9199 | 0.886 | P | 0.08 | 0.09 | A | 1 | 1.97E-01 | 0.88 ( 0.73- 1.07) |
| 31431272 | HLA_B_1502 | 0.9183 | 0.898 | P | 0.02 | 0.02 | A | 1 | 7.63E-01 | 0.94 ( 0.63- 1.40) |
| 31431272 | HLA_B_1518 | 0.9912 | 0.968 | P | 0.02 | 0.02 | A | 1 | 3.57E-01 | 0.84 ( 0.58- 1.22) |
| 31431272 | HLA_B_27 | 0.9583 | 0.954 | P | 0.02 | 0.02 | A | 1 | 1.46E-01 | 0.77 ( 0.54- 1.10) |
| 31431272 | HLA_B_2706 | 0.991 | 0.985 | P | 0.01 | 0.02 | A | 1 | 1.99E-01 | 0.77 ( 0.52- 1.14) |
| 31431272 | HLA_B_35 | 0.9727 | 0.971 | P | 0.06 | 0.04 | A | 1 | 4.52E-02 | 1.27 ( 1.01- 1.61) |
| 31431272 | HLA_B_3501 | 0.9526 | 0.918 | P | 0.04 | 0.03 | A | 1 | 1.50E-01 | 1.22 ( 0.93- 1.61) |
| 31431272 | HLA_B_3503 | 0.8532 | 0.802 | P | 0.01 | 0.01 | A | 1 | 2.38E-01 | 1.34 ( 0.83- 2.17) |
| 31431272 | HLA_B_37 | 0.9631 | 0.973 | P | 0.01 | 0.01 | A | 1 | 2.43E-01 | 0.74 ( 0.45- 1.23) |
| 31431272 | HLA_B_3701 | 0.964 | 0.974 | P | 0.01 | 0.01 | A | 1 | 2.43E-01 | 0.74 ( 0.45- 1.23) |
| 31431272 | HLA_B_38 | 0.9207 | 0.915 | P | 0.03 | 0.03 | A | 1 | 3.26E-01 | 1.17 ( 0.86- 1.60) |
| 31431272 | HLA_B_3802 | 0.924 | 0.919 | P | 0.03 | 0.03 | A | 1 | 3.65E-01 | 1.16 ( 0.85- 1.58) |
| 31431272 | HLA_B_39 | 0.8923 | 0.883 | P | 0.01 | 0.01 | A | 1 | 6.19E-01 | 0.89 ( 0.55- 1.43) |
| 31431272 | HLA_B_3901 | 0.8932 | 0.886 | P | 0.01 | 0.01 | A | 1 | 6.19E-01 | 0.89 ( 0.55- 1.43) |
| 31431272 | HLA_B_40 | 0.98 | 0.981 | P | 0.15 | 0.13 | A | 1 | 2.84E-02 | 1.18 ( 1.02- 1.37) |
| 31431272 | HLA_B_4001 | 0.9844 | 0.98 | P | 0.08 | 0.06 | A | 1 | 6.80E-02 | 1.21 ( 0.99- 1.47) |
| 31431272 | HLA_B_4006 | 0.8928 | 0.862 | P | 0.05 | 0.04 | A | 1 | 1.10E-01 | 1.21 ( 0.96- 1.54) |
| 31431272 | HLA_B_44 | 0.9948 | 0.994 | P | 0.02 | 0.05 | A | 1 | 1.76E-09 | 0.4 ( 0.30- 0.54) |
| 31431272 | HLA_B_4403 | 0.9929 | 0.994 | P | 0.02 | 0.05 | A | 1 | 1.76E-09 | 0.4 ( 0.30- 0.54) |
| 31431272 | HLA_B_46 | 0.948 | 0.923 | P | 0.14 | 0.07 | A | 1 | 8.78E-21 | 2.39 ( 1.99- 2.86) |
| 31431272 | HLA_B_4601 | 0.9442 | 0.92 | P | 0.14 | 0.07 | A | 1 | 8.78E-21 | 2.39 ( 1.99- 2.86) |
| 31431272 | HLA_B_48 | 0.9765 | 0.964 | P | 0.03 | 0.04 | A | 1 | 2.64E-01 | 0.85 ( 0.63- 1.13) |
| 31431272 | HLA_B_4801 | 0.9791 | 0.972 | P | 0.03 | 0.04 | A | 1 | 2.64E-01 | 0.85 ( 0.63- 1.13) |
| 31431272 | HLA_B_51 | 0.9913 | 0.962 | P | 0.09 | 0.08 | A | 1 | 1.92E-01 | 1.13 ( 0.94- 1.35) |
| 31431272 | HLA_B_5101 | 0.9631 | 0.932 | P | 0.09 | 0.08 | A | 1 | 1.75E-01 | 1.13 ( 0.95- 1.35) |
| 31431272 | HLA_B_52 | 0.9762 | 0.945 | P | 0.04 | 0.03 | A | 1 | 6.18E-01 | 1.07 ( 0.82- 1.41) |
| 31431272 | HLA_B_5201 | 0.9762 | 0.945 | P | 0.04 | 0.03 | A | 1 | 6.18E-01 | 1.07 ( 0.82- 1.41) |
| 31431272 | HLA_B_54 | 0.9545 | 0.921 | P | 0.05 | 0.04 | A | 1 | 1.01E-01 | 1.24 ( 0.96- 1.59) |
| 31431272 | HLA_B_5401 | 0.9526 | 0.919 | P | 0.05 | 0.04 | A | 1 | 1.01E-01 | 1.24 ( 0.96- 1.59) |
| 31431272 | HLA_B_57 | 0.9884 | 0.968 | P | 0.01 | 0.01 | A | 1 | 3.08E-02 | 0.56 ( 0.34- 0.95) |
| 31431272 | HLA_B_5701 | 0.9966 | 0.973 | P | 0.01 | 0.01 | A | 1 | 3.08E-02 | 0.56 ( 0.34- 0.95) |
| 31431272 | HLA_B_58 | 0.9967 | 0.991 | P | 0.04 | 0.05 | A | 1 | 9.23E-02 | 0.81 ( 0.64- 1.04) |
| 31431272 | HLA_B_5801 | 0.9963 | 0.99 | P | 0.04 | 0.05 | A | 1 | 9.23E-02 | 0.81 ( 0.64- 1.04) |
| 31431272 | HLA_B_67 | 0.8911 | 0.872 | P | 0.01 | 0.01 | A | 1 | 6.14E-01 | 0.88 ( 0.54- 1.44) |
| 31431272 | HLA_B_6701 | 0.8852 | 0.871 | P | 0.01 | 0.01 | A | 1 | 6.14E-01 | 0.88 ( 0.54- 1.44) |
| 31431300 | AA_B_199_31431300_A | 0.9886 | 0.989 | P | 0.98 | 0.95 | A | 1 | 1.76E-09 | 2.49 ( 1.85- 3.36) |
| 31431300 | AA_B_199_31431300_V | 0.9957 | 0.995 | P | 0.02 | 0.05 | A | 1 | 1.76E-09 | 0.4 ( 0.30- 0.54) |
| 31431315 | AA_B_194_31431315_I | 1.0164 | 0.988 | P | 0.77 | 0.79 | A | 1 | 2.06E-01 | 0.92 ( 0.82- 1.04) |
| 31431315 | AA_B_194_31431315_V | 1.0168 | 0.988 | P | 0.23 | 0.21 | A | 1 | 2.06E-01 | 1.08 ( 0.96- 1.22) |
| 31431931 | AA_B_180_31431931 | 1.0089 | 0.987 | E | 0.15 | 0.16 | Q | 1 | 5.89E-01 | 0.96 ( 0.84- 1.11) |
| 31431937 | AA_B_178_31431937 | 1.0013 | 0.985 | K | 0.14 | 0.14 | T | 1 | 6.04E-01 | 0.96 ( 0.83- 1.11) |
| 31431940 | AA_B_177_31431940 | 1.0083 | 0.987 | D | 0.15 | 0.16 | E | 1 | 5.89E-01 | 0.96 ( 0.84- 1.11) |
| 31431958 | AA_B_171_31431958 | 0.9941 | 0.954 | H | 0.13 | 0.12 | Y | 1 | 2.04E-01 | 1.1 ( 0.95- 1.28) |
| 31431970 | AA_B_167_31431970_S | 0.9875 | 0.988 | P | 0.02 | 0.05 | A | 1 | 2.41E-09 | 0.4 ( 0.30- 0.54) |
| 31431970 | AA_B_167_31431970_W | 0.9872 | 0.986 | P | 0.98 | 0.95 | A | 1 | 2.41E-09 | 2.48 ( 1.84- 3.33) |
| 31431982 | AA_B_163_31431982_E | 0.9949 | 0.988 | P | 0.33 | 0.39 | A | 1 | 7.21E-05 | 0.81 ( 0.72- 0.90) |
| 31431982 | AA_B_163_31431982_L | 0.9633 | 0.956 | P | 0.52 | 0.48 | A | 1 | 4.05E-04 | 1.21 ( 1.09- 1.34) |
| 31431982 | AA_B_163_31431982_T | 0.9337 | 0.915 | P | 0.14 | 0.14 | A | 1 | 6.61E-01 | 1.03 ( 0.89- 1.20) |
| 31431997 | AA_B_158_31431997 | 0.9538 | 0.96 | T | 0.05 | 0.05 | A | 1 | 7.10E-01 | 1.05 ( 0.83- 1.32) |
| 31432003 | AA_B_156_31432003_D | 1.0168 | 0.983 | P | 0.02 | 0.02 | A | 1 | 4.30E-01 | 0.87 ( 0.63- 1.22) |
| 31432003 | AA_B_156_31432003_L | 0.9704 | 0.984 | P | 0.73 | 0.78 | A | 1 | 2.35E-06 | 0.75 ( 0.66- 0.84) |
| 31432003 | AA_B_156_31432003_R | 0.9814 | 0.993 | P | 0.03 | 0.04 | A | 1 | 1.48E-02 | 0.71 ( 0.54- 0.94) |
| 31432003 | AA_B_156_31432003_W | 0.9861 | 0.981 | P | 0.22 | 0.15 | A | 1 | 2.60E-11 | 1.58 ( 1.38- 1.81) |
| 31432015 | AA_B_152_31432015 | 0.958 | 0.97 | E | 0.45 | 0.38 | V | 1 | 5.55E-07 | 1.31 ( 1.18- 1.46) |
| 31432030 | AA_B_147_31432030 | 0.9978 | 0.992 | L | 0.11 | 0.10 | W | 1 | 3.52E-01 | 1.08 ( 0.92- 1.28) |
| 31432036 | AA_B_145_31432036 | 1.023 | 0.985 | L | 0.10 | 0.15 | R | 1 | 7.36E-08 | 0.65 ( 0.56- 0.76) |
| 31432042 | AA_B_143_31432042 | 0.9979 | 0.992 | S | 0.11 | 0.10 | T | 1 | 3.52E-01 | 1.08 ( 0.92- 1.28) |
| 31432078 | AA_B_131_31432078 | 0.9994 | 0.988 | R | 0.23 | 0.22 | S | 1 | 8.14E-01 | 1.02 ( 0.90- 1.15) |
| 31432123 | AA_B_116_31432123_D | 1.0022 | 0.981 | P | 0.03 | 0.06 | A | 1 | 6.03E-09 | 0.44 ( 0.33- 0.58) |
| 31432123 | AA_B_116_31432123_F | 0.9442 | 0.945 | P | 0.07 | 0.07 | A | 1 | 6.58E-01 | 1.05 ( 0.86- 1.28) |
| 31432123 | AA_B_116_31432123_L | 0.9981 | 0.98 | P | 0.18 | 0.22 | A | 1 | 2.76E-04 | 0.79 ( 0.69- 0.90) |
| 31432123 | AA_B_116_31432123_S | 0.9785 | 0.976 | P | 0.35 | 0.29 | A | 1 | 5.45E-06 | 1.29 ( 1.16- 1.45) |
| 31432123 | AA_B_116_31432123_Y | 0.9945 | 0.984 | P | 0.37 | 0.36 | A | 1 | 3.81E-01 | 1.05 ( 0.94- 1.17) |
| 31432129 | AA_B_114_31432129_D | 0.9502 | 0.985 | P | 0.42 | 0.41 | A | 1 | 3.28E-01 | 1.05 ( 0.95- 1.17) |
| 31432129 | AA_B_114_31432129_N | 0.9498 | 0.983 | P | 0.58 | 0.59 | A | 1 | 3.57E-01 | 0.95 ( 0.86- 1.06) |
| 31432132 | AA_B_113_31432132 | 0.9605 | 0.975 | Y | 0.08 | 0.11 | H | 1 | 4.71E-06 | 0.66 ( 0.55- 0.79) |
| 31432162 | AA_B_103_31432162 | 1.0092 | 0.982 | L | 0.27 | 0.31 | V | 1 | 2.18E-03 | 0.84 ( 0.75- 0.94) |
| 31432174 | AA_B_99_31432174_S | 0.9738 | 0.98 | P | 0.01 | 0.01 | A | 1 | 2.93E-01 | 0.76 ( 0.46- 1.27) |
| 31432174 | AA_B_99_31432174_Y | 0.9728 | 0.979 | P | 0.99 | 0.99 | A | 1 | 2.93E-01 | 1.31 ( 0.79- 2.19) |
| 31432180 | AA_B_97_31432180_N | 0.9641 | 0.958 | P | 0.02 | 0.02 | A | 1 | 1.95E-01 | 0.79 ( 0.55- 1.13) |
| 31432180 | AA_B_97_31432180_R | 1.0134 | 0.984 | P | 0.57 | 0.51 | A | 1 | 1.04E-05 | 1.26 ( 1.14- 1.39) |
| 31432180 | AA_B_97_31432180_S | 0.927 | 0.923 | P | 0.10 | 0.12 | A | 1 | 1.37E-02 | 0.81 ( 0.68- 0.96) |
| 31432180 | AA_B_97_31432180_T | 0.977 | 0.956 | P | 0.31 | 0.34 | A | 1 | 2.22E-02 | 0.88 ( 0.79- 0.98) |
| 31432180 | AA_B_97_31432180_V | 1.0179 | 0.994 | P | 0.01 | 0.01 | A | 1 | 3.99E-02 | 0.58 ( 0.34- 0.98) |
| 31432186 | AA_B_95_31432186_I | 0.9894 | 0.984 | P | 0.20 | 0.22 | A | 1 | 1.09E-02 | 0.85 ( 0.75- 0.96) |
| 31432186 | AA_B_95_31432186_L | 0.9683 | 0.961 | P | 0.48 | 0.43 | A | 1 | 5.16E-05 | 1.24 ( 1.12- 1.37) |
| 31432186 | AA_B_95_31432186_W | 0.976 | 0.956 | P | 0.32 | 0.35 | A | 1 | 3.90E-02 | 0.89 ( 0.80- 0.99) |
| 31432189 | AA_B_94_31432189 | 0.9882 | 0.984 | I | 0.19 | 0.21 | T | 1 | 1.98E-02 | 0.86 ( 0.76- 0.98) |
| 31432467 | AA_B_83_31432467 | 1.0071 | 0.978 | R | 0.37 | 0.45 | G | 1 | 4.23E-11 | 0.7 ( 0.63- 0.78) |
| 31432470 | AA_B_82_31432470 | 1.0071 | 0.978 | L | 0.37 | 0.45 | R | 1 | 4.23E-11 | 0.7 ( 0.63- 0.78) |
| 31432473 | AA_B_81_31432473 | 1.0036 | 0.979 | A | 0.34 | 0.42 | L | 1 | 9.65E-10 | 0.72 ( 0.65- 0.80) |
| 31432476 | AA_B_80_31432476_I | 1.018 | 0.983 | P | 0.18 | 0.19 | A | 1 | 6.90E-01 | 0.97 ( 0.86- 1.11) |
| 31432476 | AA_B_80_31432476_N | 1.0069 | 0.978 | P | 0.63 | 0.55 | A | 1 | 4.23E-11 | 1.42 ( 1.28- 1.58) |
| 31432476 | AA_B_80_31432476_T | 0.9916 | 0.977 | P | 0.18 | 0.27 | A | 1 | 1.03E-13 | 0.62 ( 0.55- 0.70) |
| 31432485 | AA_B_77_31432485_D | 0.9565 | 0.964 | P | 0.01 | 0.01 | A | 1 | 2.93E-01 | 0.76 ( 0.46- 1.27) |
| 31432485 | AA_B_77_31432485_N | 1.0036 | 0.98 | P | 0.34 | 0.42 | A | 1 | 9.65E-10 | 0.72 ( 0.65- 0.80) |
| 31432485 | AA_B_77_31432485_S | 1.008 | 0.98 | P | 0.65 | 0.57 | A | 1 | 3.27E-10 | 1.4 ( 1.26- 1.56) |
| 31432488 | **AA_B_76_31432488** | 0.9471 | 0.923 | V | 0.14 | 0.06 | E | 1 | 5.81E-21 | 2.4 ( 2.00- 2.88) |
| 31432494 | AA_B_74_31432494 | 0.9579 | 0.943 | D | 0.29 | 0.22 | Y | 1 | 5.27E-09 | 1.42 ( 1.26- 1.60) |
| 31432503 | AA_B_71_31432503 | 0.9681 | 0.952 | A | 0.32 | 0.27 | T | 1 | 1.37E-05 | 1.29 ( 1.15- 1.44) |
| 31432506 | AA_B_70_31432506_K | 0.9701 | 0.97 | P | 0.02 | 0.03 | A | 1 | 7.47E-02 | 0.73 ( 0.51- 1.03) |
| 31432506 | AA_B_70_31432506_N | 0.9672 | 0.951 | P | 0.68 | 0.73 | A | 1 | 1.37E-05 | 0.78 ( 0.69- 0.87) |
| 31432506 | AA_B_70_31432506_Q | 0.9657 | 0.946 | P | 0.25 | 0.18 | A | 1 | 1.11E-11 | 1.56 ( 1.37- 1.77) |
| 31432506 | AA_B_70_31432506_S | 1.0043 | 0.995 | P | 0.05 | 0.07 | A | 1 | 1.72E-02 | 0.76 ( 0.61- 0.95) |
| 31432509 | AA_B_69_31432509_A | 0.9841 | 0.981 | P | 0.18 | 0.20 | A | 1 | 1.47E-02 | 0.85 ( 0.74- 0.97) |
| 31432509 | AA_B_69_31432509_R | 0.9478 | 0.923 | P | 0.14 | 0.06 | A | 1 | 5.81E-21 | 2.4 ( 2.00- 2.88) |
| 31432509 | AA_B_69_31432509_T | 0.9685 | 0.953 | P | 0.68 | 0.73 | A | 1 | 1.37E-05 | 0.78 ( 0.69- 0.87) |
| 31432515 | AA_B_67_31432515_C | 0.9639 | 0.96 | P | 0.08 | 0.08 | A | 1 | 5.37E-01 | 0.94 ( 0.78- 1.14) |
| 31432515 | AA_B_67_31432515_F | 1.0185 | 0.977 | P | 0.16 | 0.14 | A | 1 | 4.09E-02 | 1.16 ( 1.01- 1.33) |
| 31432515 | AA_B_67_31432515_M | 1.0041 | 0.994 | P | 0.05 | 0.07 | A | 1 | 1.72E-02 | 0.76 ( 0.61- 0.95) |
| 31432515 | AA_B_67_31432515_S | 0.9636 | 0.955 | P | 0.46 | 0.54 | A | 1 | 1.66E-08 | 0.74 ( 0.67- 0.82) |
| 31432515 | AA_B_67_31432515_Y | 0.9648 | 0.946 | P | 0.25 | 0.18 | A | 1 | 1.11E-11 | 1.56 ( 1.37- 1.77) |
| 31432518 | AA_B_66_31432518_I | 0.9767 | 0.947 | P | 0.81 | 0.87 | A | 1 | 1.79E-10 | 0.63 ( 0.55- 0.73) |
| 31432518 | AA_B_66_31432518_K | 0.9482 | 0.924 | P | 0.14 | 0.06 | A | 1 | 5.81E-21 | 2.4 ( 2.00- 2.88) |
| 31432518 | AA_B_66_31432518_N | 1.0042 | 0.994 | P | 0.05 | 0.07 | A | 1 | 1.72E-02 | 0.76 ( 0.61- 0.95) |
| 31432521 | AA_B_65_31432521 | 1.0031 | 0.994 | R | 0.05 | 0.07 | Q | 1 | 1.72E-02 | 0.76 ( 0.61- 0.95) |
| 31432527 | AA_B_63_31432527 | 0.9978 | 0.968 | N | 0.35 | 0.33 | E | 1 | 2.12E-01 | 1.07 ( 0.96- 1.19) |
| 31432530 | AA_B_62_31432530 | 1.0032 | 0.994 | G | 0.05 | 0.07 | R | 1 | 1.72E-02 | 0.76 ( 0.61- 0.95) |
| 31432560 | AA_B_52_31432560 | 0.9566 | 0.923 | V | 0.05 | 0.04 | I | 1 | 8.76E-02 | 1.25 ( 0.97- 1.61) |
| 31432578 | AA_B_46_31432578 | 1.0232 | 0.989 | A | 0.35 | 0.34 | E | 1 | 2.80E-01 | 1.06 ( 0.95- 1.18) |
| 31432581 | AA_B_45_31432581_E | 1.0058 | 0.971 | P | 0.18 | 0.20 | A | 1 | 3.08E-02 | 0.87 ( 0.76- 0.99) |
| 31432581 | AA_B_45_31432581_G | 0.9569 | 0.923 | P | 0.05 | 0.04 | A | 1 | 8.76E-02 | 1.25 ( 0.97- 1.61) |
| 31432581 | AA_B_45_31432581_K | 0.9867 | 0.989 | P | 0.18 | 0.19 | A | 1 | 4.23E-01 | 0.95 ( 0.83- 1.08) |
| 31432581 | AA_B_45_31432581_M | 1.0232 | 0.989 | P | 0.35 | 0.34 | A | 1 | 2.80E-01 | 1.06 ( 0.95- 1.18) |
| 31432581 | AA_B_45_31432581_T | 1.0345 | 0.991 | P | 0.24 | 0.23 | A | 1 | 4.86E-01 | 1.04 ( 0.93- 1.17) |
| 31432593 | AA_B_41_31432593 | 1.0015 | 0.991 | T | 0.28 | 0.34 | A | 1 | 3.23E-06 | 0.77 ( 0.69- 0.86) |
| 31432620 | AA_B_32_31432620 | 0.9895 | 0.992 | L | 0.20 | 0.21 | Q | 1 | 1.56E-01 | 0.91 ( 0.80- 1.04) |
| 31432644 | AA_B_24_31432644_A | 1.0018 | 0.993 | P | 0.54 | 0.46 | A | 1 | 9.48E-11 | 1.41 ( 1.27- 1.56) |
| 31432644 | AA_B_24_31432644_S | 1.0158 | 0.994 | P | 0.15 | 0.18 | A | 1 | 2.90E-02 | 0.86 ( 0.75- 0.98) |
| 31432644 | AA_B_24_31432644_T | 1.0008 | 0.993 | P | 0.30 | 0.37 | A | 1 | 2.85E-07 | 0.75 ( 0.67- 0.84) |
| 31432680 | AA_B_12_31432680 | 1.0006 | 0.995 | V | 0.22 | 0.23 | M | 1 | 1.19E-01 | 0.91 ( 0.80- 1.03) |
| 31432683 | AA_B_11_31432683 | 1.0005 | 0.995 | S | 0.22 | 0.23 | A | 1 | 1.19E-01 | 0.91 ( 0.80- 1.03) |
| 31432689 | AA_B_9_31432689_D | 1.0403 | 1 | P | 0.01 | 0.01 | A | 1 | 8.99E-01 | 0.97 ( 0.62- 1.52) |
| 31432689 | AA_B_9_31432689_H | 0.9881 | 0.991 | P | 0.19 | 0.18 | A | 1 | 3.40E-01 | 1.07 ( 0.93- 1.22) |
| 31432689 | AA_B_9_31432689_Y | 0.9935 | 0.991 | P | 0.80 | 0.81 | A | 1 | 3.72E-01 | 0.94 ( 0.83- 1.07) |
| 31432865 | AA_B_-8_31432865_L | 1.0136 | 0.992 | P | 0.53 | 0.46 | A | 1 | 6.11E-09 | 1.36 ( 1.22- 1.50) |
| 31432865 | AA_B_-8_31432865_V | 1.0121 | 0.99 | P | 0.47 | 0.54 | A | 1 | 7.01E-09 | 0.74 ( 0.67- 0.82) |
| 31432871 | AA_B_-10_31432871_A | 1.0011 | 0.993 | P | 0.21 | 0.21 | A | 1 | 8.62E-01 | 1.01 ( 0.89- 1.15) |
| 31432871 | AA_B_-10_31432871_G | 0.9989 | 0.991 | P | 0.79 | 0.79 | A | 1 | 8.87E-01 | 0.99 ( 0.87- 1.12) |
| 31432874 | AA_B_-11_31432874_S | 1.0038 | 0.992 | P | 0.47 | 0.40 | A | 1 | 2.65E-07 | 1.31 ( 1.18- 1.46) |
| 31432874 | AA_B_-11_31432874_W | 1.0022 | 0.991 | P | 0.53 | 0.60 | A | 1 | 3.00E-07 | 0.76 ( 0.69- 0.85) |
| 31432889 | AA_B_-16_31432889_L | 1.0108 | 0.995 | P | 0.30 | 0.37 | A | 1 | 3.28E-09 | 0.72 ( 0.64- 0.80) |
| 31432889 | AA_B_-16_31432889_V | 1.0105 | 0.994 | P | 0.71 | 0.63 | A | 1 | 2.86E-09 | 1.39 ( 1.25- 1.55) |
| 31432904 | AA_B_-21_31432904_M | 0.987 | 0.994 | P | 0.13 | 0.14 | A | 1 | 1.41E-01 | 0.89 ( 0.77- 1.04) |
| 31432904 | AA_B_-21_31432904_T | 0.9848 | 0.992 | P | 0.87 | 0.86 | A | 1 | 1.31E-01 | 1.12 ( 0.97- 1.31) |
| 31432910 | AA_B_-23_31432910_L | 0.9855 | 0.992 | P | 0.13 | 0.14 | A | 1 | 1.41E-01 | 0.89 ( 0.77- 1.04) |
| 31432910 | AA_B_-23_31432910_R | 0.9841 | 0.991 | P | 0.87 | 0.86 | A | 1 | 1.31E-01 | 1.12 ( 0.97- 1.31) |
| 32656004 | AA_DRB1_233_32656004_R | 0.9993 | 0.986 | P | 0.28 | 0.32 | A | 1 | 3.43E-03 | 0.85 ( 0.76- 0.95) |
| 32656004 | AA_DRB1_233_32656004_T | 1.0087 | 0.995 | P | 0.72 | 0.68 | A | 1 | 3.15E-03 | 1.18 ( 1.06- 1.32) |
| 32656611 | AA_DRB1_189_32656611_R | 0.9696 | 0.96 | P | 0.92 | 0.95 | A | 1 | 1.51E-05 | 0.63 ( 0.51- 0.78) |
| 32656611 | AA_DRB1_189_32656611_S | 1.0012 | 0.992 | P | 0.08 | 0.05 | A | 1 | 1.20E-05 | 1.59 ( 1.29- 1.96) |
| 32657335 | AA_DRB1_181_32657335_M | 1.0279 | 0.994 | P | 0.23 | 0.28 | A | 1 | 2.85E-05 | 0.78 ( 0.69- 0.88) |
| 32657335 | AA_DRB1_181_32657335_T | 1.0224 | 0.989 | P | 0.77 | 0.72 | A | 1 | 2.57E-05 | 1.29 ( 1.14- 1.44) |
| 32657338 | AA_DRB1_180_32657338_L | 0.9806 | 0.989 | P | 0.12 | 0.11 | A | 1 | 2.61E-01 | 1.1 ( 0.93- 1.29) |
| 32657338 | AA_DRB1_180_32657338_V | 0.9689 | 0.978 | P | 0.88 | 0.89 | A | 1 | 2.78E-01 | 0.92 ( 0.78- 1.07) |
| 32657380 | AA_DRB1_166_32657380_R | 0.8804 | 0.877 | P | 0.99 | 0.99 | A | 1 | 7.82E-03 | 2.2 ( 1.23- 3.92) |
| 32657431 | AA_DRB1_149_32657431_H | 0.9958 | 0.993 | P | 0.37 | 0.37 | A | 1 | 6.28E-01 | 0.97 ( 0.88- 1.08) |
| 32657431 | AA_DRB1_149_32657431_Q | 1.0004 | 0.997 | P | 0.63 | 0.63 | A | 1 | 6.28E-01 | 1.03 ( 0.92- 1.14) |
| 32657452 | AA_DRB1_142_32657452_M | 0.969 | 0.995 | P | 0.26 | 0.21 | A | 1 | 1.87E-06 | 1.35 ( 1.19- 1.53) |
| 32657452 | AA_DRB1_142_32657452_V | 0.9642 | 0.989 | P | 0.74 | 0.79 | A | 1 | 1.87E-06 | 0.74 ( 0.65- 0.84) |
| 32657458 | AA_DRB1_140_32657458_A | 0.9755 | 0.993 | P | 0.51 | 0.50 | A | 1 | 8.45E-01 | 1.01 ( 0.91- 1.12) |
| 32657458 | AA_DRB1_140_32657458_T | 0.9724 | 0.99 | P | 0.49 | 0.50 | A | 1 | 8.45E-01 | 0.99 ( 0.89- 1.10) |
| 32657479 | AA_DRB1_133_32657479_L | 0.9683 | 0.994 | P | 0.26 | 0.21 | A | 1 | 1.87E-06 | 1.35 ( 1.19- 1.53) |
| 32657479 | AA_DRB1_133_32657479_R | 0.9645 | 0.99 | P | 0.74 | 0.79 | A | 1 | 1.87E-06 | 0.74 ( 0.65- 0.84) |
| 32657518 | AA_DRB1_120_32657518_N | 0.9765 | 0.989 | P | 0.13 | 0.12 | A | 1 | 7.32E-01 | 1.03 ( 0.88- 1.20) |
| 32657518 | AA_DRB1_120_32657518_S | 0.9698 | 0.982 | P | 0.87 | 0.88 | A | 1 | 7.32E-01 | 0.97 ( 0.83- 1.14) |
| 32657566 | AA_DRB1_104_32657566_A | 0.9983 | 0.998 | P | 0.34 | 0.38 | A | 1 | 9.85E-03 | 0.87 ( 0.78- 0.97) |
| 32657566 | AA_DRB1_104_32657566_S | 0.9942 | 0.995 | P | 0.66 | 0.62 | A | 1 | 9.85E-03 | 1.15 ( 1.04- 1.28) |
| 32657584 | AA_DRB1_98_32657584_E | 0.9979 | 0.998 | P | 0.34 | 0.38 | A | 1 | 9.85E-03 | 0.87 ( 0.78- 0.97) |
| 32657584 | AA_DRB1_98_32657584_K | 0.9942 | 0.995 | P | 0.66 | 0.62 | A | 1 | 9.85E-03 | 1.15 ( 1.04- 1.28) |
| 32657590 | AA_DRB1_96_32657590_E | 0.9948 | 0.991 | P | 0.02 | 0.03 | A | 1 | 5.38E-02 | 0.73 ( 0.53- 1.01) |
| 32657590 | AA_DRB1_96_32657590_H | 1.0103 | 0.989 | P | 0.59 | 0.64 | A | 1 | 2.23E-04 | 0.82 ( 0.74- 0.91) |
| 32657590 | AA_DRB1_96_32657590_Q | 0.9653 | 0.994 | P | 0.27 | 0.22 | A | 1 | 3.07E-05 | 1.3 ( 1.15- 1.47) |
| 32657590 | AA_DRB1_96_32657590_Y | 0.9804 | 0.989 | P | 0.12 | 0.11 | A | 1 | 2.61E-01 | 1.1 ( 0.93- 1.29) |
| 32659890 | AA_DRB1_86_32659890 | 0.8732 | 0.903 | V | 0.40 | 0.39 | G | 1 | 6.92E-01 | 1.02 ( 0.92- 1.14) |
| 32659893 | AA_DRB1_85_32659893 | 0.8986 | 0.885 | A | 0.09 | 0.10 | V | 1 | 2.61E-01 | 0.9 ( 0.76- 1.08) |
| 32659914 | AA_DRB1_78_32659914 | 1.0267 | 0.993 | V | 0.22 | 0.27 | Y | 1 | 2.63E-04 | 0.8 ( 0.71- 0.90) |
| 32659917 | AA_DRB1_77_32659917 | 0.9739 | 0.993 | N | 0.05 | 0.04 | T | 1 | 1.47E-01 | 1.21 ( 0.94- 1.56) |
| 32659926 | AA_DRB1_74_32659926_A | 0.9714 | 0.968 | P | 0.57 | 0.56 | A | 1 | 2.00E-01 | 1.07 ( 0.96- 1.19) |
| 32659926 | AA_DRB1_74_32659926_E | 0.9879 | 0.955 | P | 0.23 | 0.20 | A | 1 | 1.16E-02 | 1.17 ( 1.04- 1.33) |
| 32659926 | AA_DRB1_74_32659926_L | 0.9945 | 0.984 | P | 0.08 | 0.05 | A | 1 | 7.66E-06 | 1.61 ( 1.31- 1.98) |
| 32659926 | AA_DRB1_74_32659926_Q | 1.0366 | 0.992 | P | 0.07 | 0.15 | A | 1 | 3.14E-21 | 0.43 ( 0.36- 0.51) |
| 32659926 | AA_DRB1_74_32659926_R | 0.9726 | 0.992 | P | 0.05 | 0.04 | A | 1 | 1.47E-01 | 1.21 ( 0.94- 1.56) |
| 32659929 | AA_DRB1_73_32659929 | 1.0248 | 0.994 | G | 0.12 | 0.19 | A | 1 | 2.78E-14 | 0.57 ( 0.49- 0.66) |
| 32659935 | AA_DRB1_71_32659935_A | 0.9346 | 0.986 | P | 0.22 | 0.19 | A | 1 | 2.64E-03 | 1.22 ( 1.07- 1.39) |
| 32659935 | AA_DRB1_71_32659935_E | 1.0229 | 0.996 | P | 0.05 | 0.07 | A | 1 | 9.92E-05 | 0.65 ( 0.52- 0.81) |
| 32659935 | AA_DRB1_71_32659935_K | 0.9936 | 0.98 | P | 0.06 | 0.06 | A | 1 | 2.80E-01 | 1.13 ( 0.91- 1.40) |
| 32659935 | AA_DRB1_71_32659935_R | 0.9819 | 0.985 | P | 0.67 | 0.68 | A | 1 | 2.84E-01 | 0.94 ( 0.84- 1.05) |
| 32659938 | AA_DRB1_70_32659938_D | 0.9604 | 0.958 | P | 0.39 | 0.46 | A | 1 | 1.62E-07 | 0.76 ( 0.68- 0.84) |
| 32659938 | AA_DRB1_70_32659938_Q | 1.0069 | 0.983 | P | 0.41 | 0.37 | A | 1 | 1.49E-03 | 1.18 ( 1.07- 1.31) |
| 32659938 | AA_DRB1_70_32659938_R | 1.0315 | 0.981 | P | 0.20 | 0.17 | A | 1 | 1.00E-02 | 1.19 ( 1.04- 1.35) |
| 32659947 | AA_DRB1_67_32659947_F | 0.9772 | 0.929 | P | 0.26 | 0.25 | A | 1 | 4.91E-01 | 1.04 ( 0.93- 1.17) |
| 32659947 | AA_DRB1_67_32659947_I | 0.956 | 0.944 | P | 0.47 | 0.50 | A | 1 | 3.68E-02 | 0.9 ( 0.81- 0.99) |
| 32659947 | AA_DRB1_67_32659947_L | 0.9822 | 0.97 | P | 0.27 | 0.25 | A | 1 | 1.07E-01 | 1.1 ( 0.98- 1.24) |
| 32659968 | AA_DRB1_60_32659968_H | 0.8909 | 0.867 | P | 0.03 | 0.03 | A | 1 | 3.38E-01 | 0.87 ( 0.65- 1.16) |
| 32659968 | AA_DRB1_60_32659968_S | 1.0014 | 0.952 | P | 0.31 | 0.36 | A | 1 | 4.86E-05 | 0.8 ( 0.72- 0.89) |
| 32659968 | AA_DRB1_60_32659968_Y | 0.9962 | 0.941 | P | 0.66 | 0.60 | A | 1 | 1.79E-05 | 1.26 ( 1.13- 1.40) |
| 32659974 | AA_DRB1_58_32659974 | 0.8795 | 0.807 | E | 0.06 | 0.06 | A | 1 | 3.36E-01 | 0.9 ( 0.73- 1.12) |
| 32659977 | AA_DRB1_57_32659977_A | 0.8898 | 0.865 | P | 0.03 | 0.03 | A | 1 | 3.38E-01 | 0.87 ( 0.65- 1.16) |
| 32659977 | AA_DRB1_57_32659977_D | 0.9544 | 0.942 | P | 0.51 | 0.51 | A | 1 | 5.79E-01 | 1.03 ( 0.93- 1.14) |
| 32659977 | AA_DRB1_57_32659977_S | 0.9901 | 0.978 | P | 0.14 | 0.10 | A | 1 | 2.64E-08 | 1.58 ( 1.34- 1.85) |
| 32659977 | AA_DRB1_57_32659977_V | 1.0014 | 0.952 | P | 0.31 | 0.36 | A | 1 | 4.86E-05 | 0.8 ( 0.72- 0.89) |
| 32660007 | AA_DRB1_47_32660007 | 0.9777 | 0.976 | F | 0.46 | 0.46 | Y | 1 | 8.99E-01 | 0.99 ( 0.90- 1.10) |
| 32660034 | AA_DRB1_38_32660034_L | 0.8946 | 0.881 | P | 0.09 | 0.10 | A | 1 | 1.93E-01 | 0.89 ( 0.75- 1.06) |
| 32660034 | AA_DRB1_38_32660034_V | 0.9057 | 0.89 | P | 0.90 | 0.89 | A | 1 | 3.98E-02 | 1.19 ( 1.01- 1.41) |
| 32660037 | AA_DRB1_37_32660037_F | 1.0193 | 0.982 | P | 0.11 | 0.20 | A | 1 | 1.43E-19 | 0.5 ( 0.43- 0.58) |
| 32660037 | AA_DRB1_37_32660037_L | 0.8946 | 0.881 | P | 0.09 | 0.10 | A | 1 | 1.93E-01 | 0.89 ( 0.75- 1.06) |
| 32660037 | AA_DRB1_37_32660037_N | 0.9867 | 0.992 | P | 0.25 | 0.23 | A | 1 | 4.25E-02 | 1.13 ( 1.00- 1.28) |
| 32660037 | AA_DRB1_37_32660037_S | 0.9675 | 0.985 | P | 0.30 | 0.26 | A | 1 | 2.77E-04 | 1.24 ( 1.10- 1.39) |
| 32660037 | AA_DRB1_37_32660037_Y | 0.9402 | 0.924 | P | 0.25 | 0.22 | A | 1 | 4.11E-03 | 1.19 ( 1.06- 1.35) |
| 32660042 | HLA_DRB1_01 | 0.9939 | 0.991 | P | 0.02 | 0.03 | A | 1 | 5.25E-02 | 0.73 ( 0.53- 1.00) |
| 32660042 | HLA_DRB1_0101 | 0.9936 | 0.991 | P | 0.02 | 0.03 | A | 1 | 5.25E-02 | 0.73 ( 0.53- 1.00) |
| 32660042 | HLA_DRB1_03 | 0.9713 | 0.991 | P | 0.05 | 0.04 | A | 1 | 1.64E-01 | 1.2 ( 0.93- 1.54) |
| 32660042 | HLA_DRB1_0301 | 0.9732 | 0.993 | P | 0.05 | 0.04 | A | 1 | 1.64E-01 | 1.2 ( 0.93- 1.54) |
| 32660042 | HLA_DRB1_04 | 0.9783 | 0.984 | P | 0.12 | 0.11 | A | 1 | 2.26E-01 | 1.11 ( 0.94- 1.30) |
| 32660042 | HLA_DRB1_0401 | 0.9731 | 0.942 | P | 0.02 | 0.02 | A | 1 | 7.16E-01 | 0.93 ( 0.63- 1.38) |
| 32660042 | HLA_DRB1_0405 | 0.9633 | 0.98 | P | 0.06 | 0.05 | A | 1 | 7.99E-03 | 1.36 ( 1.08- 1.70) |
| 32660042 | HLA_DRB1_0406 | 0.8918 | 0.876 | P | 0.02 | 0.02 | A | 1 | 4.71E-01 | 0.87 ( 0.60- 1.26) |
| 32660042 | HLA_DRB1_07 | 1.038 | 0.996 | P | 0.07 | 0.15 | A | 1 | 2.49E-21 | 0.43 ( 0.36- 0.51) |
| 32660042 | HLA_DRB1_0701 | 1.038 | 0.996 | P | 0.07 | 0.15 | A | 1 | 2.49E-21 | 0.43 ( 0.36- 0.51) |
| 32660042 | HLA_DRB1_08 | 0.9865 | 0.975 | P | 0.08 | 0.05 | A | 1 | 7.87E-06 | 1.6 ( 1.30- 1.97) |
| 32660042 | HLA_DRB1_0803 | 0.9979 | 0.987 | P | 0.08 | 0.05 | A | 1 | 1.81E-06 | 1.72 ( 1.38- 2.14) |
| 32660042 | HLA_DRB1_09 | 1.0237 | 0.99 | P | 0.15 | 0.11 | A | 1 | 1.44E-05 | 1.39 ( 1.20- 1.62) |
| 32660042 | HLA_DRB1_0901 | 1.0251 | 0.992 | P | 0.15 | 0.11 | A | 1 | 1.44E-05 | 1.39 ( 1.20- 1.62) |
| 32660042 | HLA_DRB1_11 | 0.8802 | 0.808 | P | 0.06 | 0.06 | A | 1 | 3.36E-01 | 0.9 ( 0.73- 1.12) |
| 32660042 | HLA_DRB1_1101 | 0.8793 | 0.807 | P | 0.06 | 0.06 | A | 1 | 3.36E-01 | 0.9 ( 0.73- 1.12) |
| 32660042 | HLA_DRB1_12 | 0.8969 | 0.881 | P | 0.09 | 0.10 | A | 1 | 1.93E-01 | 0.89 ( 0.75- 1.06) |
| 32660042 | HLA_DRB1_1202 | 0.9838 | 0.965 | P | 0.04 | 0.07 | A | 1 | 2.76E-05 | 0.61 ( 0.48- 0.77) |
| 32660042 | HLA_DRB1_13 | 0.997 | 0.964 | P | 0.05 | 0.08 | A | 1 | 7.59E-04 | 0.7 ( 0.57- 0.86) |
| 32660042 | HLA_DRB1_1301 | 1.0088 | 0.988 | P | 0.02 | 0.02 | A | 1 | 3.02E-01 | 0.82 ( 0.56- 1.20) |
| 32660042 | HLA_DRB1_1302 | 1.0037 | 0.994 | P | 0.03 | 0.05 | A | 1 | 7.68E-05 | 0.59 ( 0.45- 0.76) |
| 32660042 | HLA_DRB1_14 | 0.9608 | 0.95 | P | 0.04 | 0.04 | A | 1 | 2.30E-01 | 0.85 ( 0.66- 1.11) |
| 32660042 | HLA_DRB1_15 | 0.9348 | 0.986 | P | 0.22 | 0.19 | A | 1 | 2.36E-03 | 1.23 ( 1.08- 1.40) |
| 32660042 | HLA_DRB1_1501 | 0.8905 | 0.929 | P | 0.16 | 0.14 | A | 1 | 2.61E-02 | 1.18 ( 1.02- 1.37) |
| 32660042 | HLA_DRB1_1502 | 0.9035 | 0.854 | P | 0.06 | 0.05 | A | 1 | 6.71E-02 | 1.23 ( 0.99- 1.54) |
| 32660042 | HLA_DRB1_16 | 0.9384 | 0.922 | P | 0.04 | 0.02 | A | 1 | 1.09E-06 | 2.32 ( 1.65- 3.25) |
| 32660042 | HLA_DRB1_1602 | 0.9384 | 0.922 | P | 0.04 | 0.02 | A | 1 | 1.09E-06 | 2.32 ( 1.65- 3.25) |
| 32660049 | AA_DRB1_33_32660049 | 0.9871 | 0.998 | H | 0.12 | 0.11 | N | 1 | 2.41E-01 | 1.1 ( 0.94- 1.30) |
| 32660052 | AA_DRB1_32_32660052 | 0.952 | 0.935 | H | 0.23 | 0.27 | Y | 1 | 4.87E-04 | 0.81 ( 0.72- 0.91) |
| 32660055 | AA_DRB1_31_32660055_F | 1.0188 | 0.993 | P | 0.82 | 0.84 | A | 1 | 1.07E-02 | 0.84 ( 0.73- 0.96) |
| 32660055 | AA_DRB1_31_32660055_I | 1.0237 | 0.992 | P | 0.18 | 0.14 | A | 1 | 1.13E-03 | 1.26 ( 1.10- 1.45) |
| 32660058 | AA_DRB1_30_32660058_C | 0.9945 | 0.992 | P | 0.02 | 0.03 | A | 1 | 6.13E-02 | 0.74 ( 0.53- 1.02) |
| 32660058 | AA_DRB1_30_32660058_G | 1.0252 | 0.991 | P | 0.15 | 0.11 | A | 1 | 1.23E-05 | 1.4 ( 1.20- 1.62) |
| 32660058 | AA_DRB1_30_32660058_H | 0.8919 | 0.877 | P | 0.09 | 0.10 | A | 1 | 1.62E-01 | 0.88 ( 0.74- 1.05) |
| 32660058 | AA_DRB1_30_32660058_L | 1.0385 | 0.997 | P | 0.07 | 0.15 | A | 1 | 1.93E-21 | 0.43 ( 0.36- 0.51) |
| 32660058 | AA_DRB1_30_32660058_Y | 1.0059 | 0.954 | P | 0.66 | 0.59 | A | 1 | 2.23E-07 | 1.32 ( 1.19- 1.46) |
| 32660064 | AA_DRB1_28_32660064_D | 0.9997 | 0.954 | P | 0.64 | 0.59 | A | 1 | 8.39E-06 | 1.27 ( 1.14- 1.41) |
| 32660064 | AA_DRB1_28_32660064_E | 1.0017 | 0.944 | P | 0.19 | 0.29 | A | 1 | 4.26E-20 | 0.56 ( 0.50- 0.64) |
| 32660064 | AA_DRB1_28_32660064_H | 1.0238 | 0.99 | P | 0.15 | 0.11 | A | 1 | 1.23E-05 | 1.4 ( 1.20- 1.62) |
| 32660070 | AA_DRB1_26_32660070_F | 0.9504 | 0.947 | P | 0.68 | 0.70 | A | 1 | 6.24E-02 | 0.9 ( 0.80- 1.01) |
| 32660070 | AA_DRB1_26_32660070_L | 0.9098 | 0.906 | P | 0.12 | 0.14 | A | 1 | 4.27E-03 | 0.8 ( 0.68- 0.93) |
| 32660070 | AA_DRB1_26_32660070_Y | 1.0009 | 0.992 | P | 0.20 | 0.15 | A | 1 | 2.41E-06 | 1.39 ( 1.21- 1.59) |
| 32660073 | AA_DRB1_25_32660073 | 1.0382 | 0.997 | Q | 0.07 | 0.15 | R | 1 | 1.93E-21 | 0.43 ( 0.36- 0.51) |
| 32660100 | AA_DRB1_16_32660100_H | 0.9081 | 0.895 | P | 0.80 | 0.81 | A | 1 | 1.53E-01 | 0.91 ( 0.80- 1.04) |
| 32660100 | AA_DRB1_16_32660100_Y | 0.9074 | 0.885 | P | 0.19 | 0.18 | A | 1 | 9.71E-02 | 1.12 ( 0.98- 1.28) |
| 32660106 | AA_DRB1_14_32660106 | 1.0394 | 0.998 | K | 0.07 | 0.15 | E | 1 | 1.93E-21 | 0.43 ( 0.36- 0.51) |
| 32660109 | AA_DRB1_13_32660109_F | 1.0188 | 0.993 | P | 0.18 | 0.16 | A | 1 | 1.07E-02 | 1.19 ( 1.04- 1.37) |
| 32660109 | AA_DRB1_13_32660109_G | 0.9075 | 0.885 | P | 0.19 | 0.18 | A | 1 | 9.71E-02 | 1.12 ( 0.98- 1.28) |
| 32660109 | AA_DRB1_13_32660109_H | 0.9875 | 0.998 | P | 0.12 | 0.11 | A | 1 | 2.41E-01 | 1.1 ( 0.94- 1.30) |
| 32660109 | AA_DRB1_13_32660109_R | 0.9592 | 0.995 | P | 0.25 | 0.20 | A | 1 | 4.17E-05 | 1.3 ( 1.15- 1.48) |
| 32660109 | AA_DRB1_13_32660109_S | 0.9165 | 0.89 | P | 0.19 | 0.20 | A | 1 | 1.76E-01 | 0.91 ( 0.80- 1.04) |
| 32660109 | AA_DRB1_13_32660109_Y | 1.0397 | 0.998 | P | 0.07 | 0.15 | A | 1 | 1.93E-21 | 0.43 ( 0.36- 0.51) |
| 32660112 | AA_DRB1_12_32660112 | 0.9905 | 0.995 | T | 0.38 | 0.38 | K | 1 | 8.23E-01 | 1.01 ( 0.91- 1.13) |
| 32660115 | AA_DRB1_11_32660115_D | 1.0261 | 0.992 | P | 0.15 | 0.11 | A | 1 | 1.23E-05 | 1.4 ( 1.20- 1.62) |
| 32660115 | AA_DRB1_11_32660115_G | 1.0395 | 0.998 | P | 0.07 | 0.15 | A | 1 | 1.93E-21 | 0.43 ( 0.36- 0.51) |
| 32660115 | AA_DRB1_11_32660115_L | 0.9926 | 0.993 | P | 0.02 | 0.03 | A | 1 | 6.13E-02 | 0.74 ( 0.53- 1.02) |
| 32660115 | AA_DRB1_11_32660115_P | 0.9593 | 0.995 | P | 0.25 | 0.20 | A | 1 | 4.17E-05 | 1.3 ( 1.15- 1.48) |
| 32660115 | AA_DRB1_11_32660115_S | 0.9905 | 0.995 | P | 0.38 | 0.38 | A | 1 | 8.23E-01 | 1.01 ( 0.91- 1.13) |
| 32660115 | AA_DRB1_11_32660115_V | 0.9783 | 0.999 | P | 0.12 | 0.12 | A | 1 | 7.02E-01 | 1.03 ( 0.88- 1.21) |
| 32660118 | AA_DRB1_10_32660118_Q | 0.9965 | 0.995 | P | 0.61 | 0.61 | A | 1 | 7.78E-01 | 1.02 ( 0.91- 1.13) |
| 32660118 | AA_DRB1_10_32660118_Y | 0.9898 | 0.995 | P | 0.38 | 0.38 | A | 1 | 8.44E-01 | 1.01 ( 0.91- 1.12) |
| 32660121 | AA_DRB1_9_32660121_E | 0.9724 | 0.995 | P | 0.51 | 0.50 | A | 1 | 6.38E-01 | 1.03 ( 0.92- 1.14) |
| 32660121 | AA_DRB1_9_32660121_K | 1.0256 | 0.992 | P | 0.15 | 0.11 | A | 1 | 1.23E-05 | 1.4 ( 1.20- 1.62) |
| 32660121 | AA_DRB1_9_32660121_W | 0.9647 | 0.997 | P | 0.34 | 0.39 | A | 1 | 2.14E-04 | 0.81 ( 0.73- 0.91) |
| 32665400 | AA_DRB1_4_32665400_Q | 1.0276 | 0.995 | P | 0.22 | 0.27 | A | 1 | 2.31E-04 | 0.8 ( 0.71- 0.90) |
| 32665400 | AA_DRB1_4_32665400_R | 1.0244 | 0.992 | P | 0.78 | 0.73 | A | 1 | 2.31E-04 | 1.25 ( 1.11- 1.41) |
| 32665412 | AA_DRB1_-1_32665412_A | 0.9214 | 0.979 | P | 0.79 | 0.81 | A | 1 | 2.62E-02 | 0.86 ( 0.75- 0.98) |
| 32665412 | AA_DRB1_-1_32665412_S | 0.9282 | 0.987 | P | 0.21 | 0.19 | A | 1 | 2.63E-02 | 1.16 ( 1.02- 1.33) |
| 32665457 | AA_DRB1_-16_32665457_A | 0.9963 | 0.995 | P | 0.61 | 0.61 | A | 1 | 7.78E-01 | 1.02 ( 0.91- 1.13) |
| 32665457 | AA_DRB1_-16_32665457_V | 0.9908 | 0.99 | P | 0.39 | 0.39 | A | 1 | 7.77E-01 | 0.98 ( 0.89- 1.09) |
| 32665460 | AA_DRB1_-17_32665460_A | 0.9499 | 0.99 | P | 0.73 | 0.77 | A | 1 | 1.18E-03 | 0.82 ( 0.73- 0.92) |
| 32665460 | AA_DRB1_-17_32665460_T | 0.956 | 0.996 | P | 0.27 | 0.23 | A | 1 | 1.19E-03 | 1.22 ( 1.08- 1.38) |
| 32665481 | AA_DRB1_-24_32665481_F | 0.9876 | 0.998 | P | 0.12 | 0.11 | A | 1 | 2.41E-01 | 1.1 ( 0.94- 1.30) |
| 32665481 | AA_DRB1_-24_32665481_L | 0.9759 | 0.987 | P | 0.88 | 0.89 | A | 1 | 2.41E-01 | 0.91 ( 0.77- 1.07) |
| 32665484 | AA_DRB1_-25_32665484_K | 0.9965 | 0.995 | P | 0.61 | 0.61 | A | 1 | 7.78E-01 | 1.02 ( 0.91- 1.13) |
| 32665484 | AA_DRB1_-25_32665484_R | 0.9905 | 0.99 | P | 0.39 | 0.39 | A | 1 | 7.77E-01 | 0.98 ( 0.89- 1.09) |
| 32713236 | AA_DQA1_-16_32713236_L | 1.0002 | 0.997 | P | 0.48 | 0.48 | A | 1 | 9.16E-01 | 0.99 ( 0.90- 1.10) |
| 32713236 | AA_DQA1_-16_32713236_M | 0.9998 | 0.997 | P | 0.52 | 0.52 | A | 1 | 9.16E-01 | 1.01 ( 0.91- 1.11) |
| 32716284 | HLA_DQA1_01 | 0.9979 | 0.996 | P | 0.42 | 0.40 | A | 1 | 8.88E-02 | 1.1 ( 0.99- 1.22) |
| 32716284 | HLA_DQA1_0101 | 1.018 | 0.995 | P | 0.07 | 0.10 | A | 1 | 1.25E-03 | 0.74 ( 0.62- 0.89) |
| 32716284 | HLA_DQA1_0102 | 0.9643 | 0.986 | P | 0.23 | 0.21 | A | 1 | 5.08E-02 | 1.13 ( 1.00- 1.28) |
| 32716284 | HLA_DQA1_0103 | 0.9991 | 0.985 | P | 0.11 | 0.09 | A | 1 | 1.81E-03 | 1.31 ( 1.11- 1.56) |
| 32716284 | HLA_DQA1_02 | 1.0414 | 0.999 | P | 0.07 | 0.15 | A | 1 | 1.93E-21 | 0.43 ( 0.36- 0.51) |
| 32716284 | HLA_DQA1_0201 | 1.0414 | 0.999 | P | 0.07 | 0.15 | A | 1 | 1.93E-21 | 0.43 ( 0.36- 0.51) |
| 32716284 | HLA_DQA1_03 | 0.9824 | 0.987 | P | 0.27 | 0.22 | A | 1 | 1.02E-05 | 1.31 ( 1.16- 1.48) |
| 32716284 | HLA_DQA1_0301 | 0.9824 | 0.987 | P | 0.27 | 0.22 | A | 1 | 1.02E-05 | 1.31 ( 1.16- 1.48) |
| 32716284 | HLA_DQA1_05 | 0.9912 | 0.976 | P | 0.18 | 0.15 | A | 1 | 5.14E-04 | 1.28 ( 1.11- 1.47) |
| 32716284 | HLA_DQA1_0501 | 0.9912 | 0.976 | P | 0.18 | 0.15 | A | 1 | 5.14E-04 | 1.28 ( 1.11- 1.47) |
| 32716284 | HLA_DQA1_06 | 0.9996 | 0.99 | P | 0.04 | 0.07 | A | 1 | 6.25E-05 | 0.63 ( 0.50- 0.79) |
| 32716284 | HLA_DQA1_0601 | 0.9979 | 0.988 | P | 0.04 | 0.07 | A | 1 | 6.25E-05 | 0.63 ( 0.50- 0.79) |
| 32717083 | AA_DQA1_11_32717083 | 0.998 | 0.997 | C | 0.42 | 0.40 | Y | 1 | 8.88E-02 | 1.1 ( 0.99- 1.22) |
| 32717104 | AA_DQA1_18_32717104 | 0.998 | 0.997 | F | 0.42 | 0.40 | S | 1 | 8.88E-02 | 1.1 ( 0.99- 1.22) |
| 32717125 | AA_DQA1_25_32717125 | 1.0177 | 0.99 | F | 0.23 | 0.31 | Y | 1 | 4.75E-12 | 0.66 ( 0.59- 0.74) |
| 32717128 | AA_DQA1_26_32717128 | 0.9824 | 0.987 | S | 0.27 | 0.22 | T | 1 | 1.02E-05 | 1.31 ( 1.16- 1.48) |
| 32717152 | AA_DQA1_34_32717152 | 1.0211 | 0.989 | E | 0.42 | 0.47 | Q | 1 | 2.26E-05 | 0.8 ( 0.72- 0.89) |
| 32717170 | AA_DQA1_40_32717170 | 0.982 | 0.982 | G | 0.23 | 0.22 | E | 1 | 3.54E-01 | 1.06 ( 0.94- 1.20) |
| 32717173 | AA_DQA1_41_32717173 | 0.9991 | 0.985 | K | 0.11 | 0.09 | R | 1 | 1.81E-03 | 1.31 ( 1.11- 1.56) |
| 32717185 | AA_DQA1_45_32717185 | 0.9972 | 0.996 | A | 0.42 | 0.40 | V | 1 | 8.88E-02 | 1.1 ( 0.99- 1.22) |
| 32717191 | AA_DQA1_47_32717191_C | 0.982 | 0.982 | P | 0.23 | 0.22 | A | 1 | 3.54E-01 | 1.06 ( 0.94- 1.20) |
| 32717191 | AA_DQA1_47_32717191_K | 1.0414 | 0.999 | P | 0.07 | 0.15 | A | 1 | 1.93E-21 | 0.43 ( 0.36- 0.51) |
| 32717191 | AA_DQA1_47_32717191_Q | 0.9824 | 0.987 | P | 0.27 | 0.22 | A | 1 | 1.02E-05 | 1.31 ( 1.16- 1.48) |
| 32717191 | AA_DQA1_47_32717191_R | 0.9976 | 0.996 | P | 0.42 | 0.40 | A | 1 | 8.88E-02 | 1.1 ( 0.99- 1.22) |
| 32717194 | AA_DQA1_48_32717194 | 0.9979 | 0.997 | W | 0.42 | 0.40 | L | 1 | 8.88E-02 | 1.1 ( 0.99- 1.22) |
| 32717200 | AA_DQA1_50_32717200_E | 0.9976 | 0.996 | P | 0.42 | 0.40 | A | 1 | 8.88E-02 | 1.1 ( 0.99- 1.22) |
| 32717200 | AA_DQA1_50_32717200_L | 0.9958 | 0.99 | P | 0.34 | 0.38 | A | 1 | 1.08E-02 | 0.87 ( 0.78- 0.97) |
| 32717200 | AA_DQA1_50_32717200_V | 0.982 | 0.982 | P | 0.23 | 0.22 | A | 1 | 3.54E-01 | 1.06 ( 0.94- 1.20) |
| 32717203 | AA_DQA1_51_32717203 | 0.982 | 0.982 | L | 0.23 | 0.22 | F | 1 | 3.54E-01 | 1.06 ( 0.94- 1.20) |
| 32717206 | AA_DQA1_52_32717206_H | 1.0414 | 1 | P | 0.07 | 0.15 | A | 1 | 1.93E-21 | 0.43 ( 0.36- 0.51) |
| 32717206 | AA_DQA1_52_32717206_R | 0.9949 | 0.997 | P | 0.51 | 0.45 | A | 1 | 4.57E-06 | 1.27 ( 1.15- 1.41) |
| 32717206 | AA_DQA1_52_32717206_S | 0.9973 | 0.996 | P | 0.42 | 0.40 | A | 1 | 8.88E-02 | 1.1 ( 0.99- 1.22) |
| 32717209 | AA_DQA1_53_32717209_K | 0.9979 | 0.996 | P | 0.42 | 0.40 | A | 1 | 8.88E-02 | 1.1 ( 0.99- 1.22) |
| 32717209 | AA_DQA1_53_32717209_Q | 0.982 | 0.982 | P | 0.23 | 0.22 | A | 1 | 3.54E-01 | 1.06 ( 0.94- 1.20) |
| 32717209 | AA_DQA1_53_32717209_R | 0.9957 | 0.989 | P | 0.34 | 0.38 | A | 1 | 1.08E-02 | 0.87 ( 0.78- 0.97) |
| 32717212 | AA_DQA1_54_32717212 | 1.0415 | 1 | L | 0.07 | 0.15 | F | 1 | 1.93E-21 | 0.43 ( 0.36- 0.51) |
| 32717215 | AA_DQA1_55_32717215 | 0.9977 | 0.996 | G | 0.42 | 0.40 | R | 1 | 8.88E-02 | 1.1 ( 0.99- 1.22) |
| 32717218 | AA_DQA1_56_32717218_G | 0.9976 | 0.996 | P | 0.42 | 0.40 | A | 1 | 8.88E-02 | 1.1 ( 0.99- 1.22) |
| 32717218 | AA_DQA1_56_32717218_R | 0.9824 | 0.987 | P | 0.27 | 0.22 | A | 1 | 1.02E-05 | 1.31 ( 1.16- 1.48) |
| 32717218 | AA_DQA1_56_32717218_x | 0.9967 | 0.986 | P | 0.30 | 0.38 | A | 1 | 8.90E-09 | 0.73 ( 0.65- 0.81) |
| 32717233 | AA_DQA1_61_32717233 | 0.998 | 0.997 | G | 0.42 | 0.40 | F | 1 | 8.88E-02 | 1.1 ( 0.99- 1.22) |
| 32717242 | AA_DQA1_64_32717242 | 0.9975 | 0.996 | R | 0.42 | 0.40 | T | 1 | 8.88E-02 | 1.1 ( 0.99- 1.22) |
| 32717248 | AA_DQA1_66_32717248 | 0.9977 | 0.996 | M | 0.42 | 0.40 | I | 1 | 8.88E-02 | 1.1 ( 0.99- 1.22) |
| 32717257 | AA_DQA1_69_32717257_A | 0.9977 | 0.996 | P | 0.42 | 0.40 | A | 1 | 8.88E-02 | 1.1 ( 0.99- 1.22) |
| 32717257 | AA_DQA1_69_32717257_L | 0.9968 | 0.994 | P | 0.52 | 0.52 | A | 1 | 8.95E-01 | 1.01 ( 0.91- 1.12) |
| 32717257 | AA_DQA1_69_32717257_T | 0.9889 | 0.991 | P | 0.05 | 0.08 | A | 1 | 2.75E-04 | 0.68 ( 0.55- 0.83) |
| 32717275 | AA_DQA1_75_32717275 | 0.9912 | 0.976 | S | 0.18 | 0.15 | I | 1 | 5.14E-04 | 1.28 ( 1.11- 1.47) |
| 32717278 | AA_DQA1_76_32717278_L | 0.9967 | 0.986 | P | 0.30 | 0.38 | A | 1 | 8.90E-09 | 0.73 ( 0.65- 0.81) |
| 32717278 | AA_DQA1_76_32717278_M | 0.998 | 0.997 | P | 0.42 | 0.40 | A | 1 | 8.88E-02 | 1.1 ( 0.99- 1.22) |
| 32717278 | AA_DQA1_76_32717278_V | 0.9824 | 0.987 | P | 0.27 | 0.22 | A | 1 | 1.02E-05 | 1.31 ( 1.16- 1.48) |
| 32717290 | AA_DQA1_80_32717290 | 0.998 | 0.997 | Y | 0.42 | 0.40 | S | 1 | 8.88E-02 | 1.1 ( 0.99- 1.22) |
| 32717784 | AA_DQA1_107_32717784_I | 0.9865 | 0.971 | P | 0.18 | 0.15 | A | 1 | 5.14E-04 | 1.28 ( 1.11- 1.47) |
| 32717784 | AA_DQA1_107_32717784_T | 0.9915 | 0.976 | P | 0.82 | 0.85 | A | 1 | 5.14E-04 | 0.78 ( 0.68- 0.90) |
| 32717850 | AA_DQA1_129_32717850_H | 0.9528 | 0.989 | P | 0.69 | 0.69 | A | 1 | 8.05E-01 | 1.01 ( 0.91- 1.14) |
| 32717850 | AA_DQA1_129_32717850_Q | 0.9528 | 0.989 | P | 0.31 | 0.31 | A | 1 | 8.05E-01 | 0.99 ( 0.88- 1.10) |
| 32717853 | AA_DQA1_130_32717853_A | 0.9991 | 0.985 | P | 0.11 | 0.09 | A | 1 | 1.81E-03 | 1.31 ( 1.11- 1.56) |
| 32717853 | AA_DQA1_130_32717853_S | 0.9983 | 0.984 | P | 0.89 | 0.91 | A | 1 | 1.81E-03 | 0.76 ( 0.64- 0.90) |
| 32717931 | AA_DQA1_156_32717931_F | 0.9914 | 0.976 | P | 0.82 | 0.85 | A | 1 | 5.14E-04 | 0.78 ( 0.68- 0.90) |
| 32717931 | AA_DQA1_156_32717931_L | 0.9914 | 0.976 | P | 0.18 | 0.15 | A | 1 | 5.14E-04 | 1.28 ( 1.11- 1.47) |
| 32717946 | AA_DQA1_161_32717946_D | 0.9912 | 0.975 | P | 0.82 | 0.85 | A | 1 | 5.14E-04 | 0.78 ( 0.68- 0.90) |
| 32717946 | AA_DQA1_161_32717946_E | 0.9914 | 0.976 | P | 0.18 | 0.15 | A | 1 | 5.14E-04 | 1.28 ( 1.11- 1.47) |
| 32717952 | AA_DQA1_163_32717952_I | 0.9912 | 0.975 | P | 0.82 | 0.85 | A | 1 | 5.14E-04 | 0.78 ( 0.68- 0.90) |
| 32717952 | AA_DQA1_163_32717952_S | 0.9914 | 0.976 | P | 0.18 | 0.15 | A | 1 | 5.14E-04 | 1.28 ( 1.11- 1.47) |
| 32717988 | AA_DQA1_175_32717988_E | 1.0028 | 0.989 | P | 0.40 | 0.45 | A | 1 | 1.89E-05 | 0.8 ( 0.72- 0.88) |
| 32717988 | AA_DQA1_175_32717988_K | 0.9914 | 0.976 | P | 0.18 | 0.15 | A | 1 | 5.14E-04 | 1.28 ( 1.11- 1.47) |
| 32717988 | AA_DQA1_175_32717988_Q | 0.9978 | 0.997 | P | 0.42 | 0.40 | A | 1 | 8.88E-02 | 1.1 ( 0.99- 1.22) |
| 32718380 | AA_DQA1_187_32718380_A | 0.983 | 0.987 | P | 0.73 | 0.78 | A | 1 | 9.02E-06 | 0.76 ( 0.68- 0.86) |
| 32718380 | AA_DQA1_187_32718380_T | 0.983 | 0.987 | P | 0.27 | 0.22 | A | 1 | 9.02E-06 | 1.31 ( 1.16- 1.48) |
| 32718440 | AA_DQA1_207_32718440_M | 0.9648 | 0.987 | P | 0.23 | 0.21 | A | 1 | 5.08E-02 | 1.13 ( 1.00- 1.28) |
| 32718440 | AA_DQA1_207_32718440_V | 0.9647 | 0.986 | P | 0.77 | 0.79 | A | 1 | 5.08E-02 | 0.88 ( 0.78- 1.00) |
| 32718464 | AA_DQA1_215_32718464_F | 0.9963 | 0.989 | P | 0.66 | 0.62 | A | 1 | 1.17E-02 | 1.15 ( 1.03- 1.28) |
| 32718464 | AA_DQA1_215_32718464_L | 0.9962 | 0.989 | P | 0.34 | 0.38 | A | 1 | 1.17E-02 | 0.87 ( 0.78- 0.97) |
| 32718473 | AA_DQA1_218_32718473_Q | 0.9981 | 0.997 | P | 0.42 | 0.40 | A | 1 | 8.88E-02 | 1.1 ( 0.99- 1.22) |
| 32718473 | AA_DQA1_218_32718473_R | 0.9981 | 0.997 | P | 0.58 | 0.60 | A | 1 | 8.88E-02 | 0.91 ( 0.82- 1.01) |
| 32737107 | AA_DQB1_224_32737107_Q | 0.9809 | 0.961 | P | 0.87 | 0.88 | A | 1 | 6.29E-01 | 0.96 ( 0.83- 1.12) |
| 32737107 | AA_DQB1_224_32737107_R | 0.9819 | 0.962 | P | 0.13 | 0.12 | A | 1 | 6.29E-01 | 1.04 ( 0.89- 1.21) |
| 32737116 | AA_DQB1_221_32737116_H | 0.9756 | 0.961 | P | 0.58 | 0.60 | A | 1 | 1.46E-01 | 0.93 ( 0.83- 1.03) |
| 32737116 | AA_DQB1_221_32737116_Q | 0.9747 | 0.961 | P | 0.42 | 0.40 | A | 1 | 1.46E-01 | 1.08 ( 0.97- 1.20) |
| 32737119 | AA_DQB1_220_32737119_H | 0.9756 | 0.961 | P | 0.58 | 0.60 | A | 1 | 1.46E-01 | 0.93 ( 0.83- 1.03) |
| 32737119 | AA_DQB1_220_32737119_R | 0.9747 | 0.961 | P | 0.42 | 0.40 | A | 1 | 1.46E-01 | 1.08 ( 0.97- 1.20) |
| 32737170 | AA_DQB1_203_32737170_I | 0.9528 | 0.98 | P | 0.69 | 0.68 | A | 1 | 4.75E-01 | 1.04 ( 0.93- 1.17) |
| 32737170 | AA_DQB1_203_32737170_V | 0.9524 | 0.98 | P | 0.31 | 0.32 | A | 1 | 4.75E-01 | 0.96 ( 0.86- 1.07) |
| 32737188 | AA_DQB1_197_32737188_N | 0.8842 | 0.843 | P | 0.11 | 0.08 | A | 1 | 2.93E-04 | 1.39 ( 1.16- 1.66) |
| 32737188 | AA_DQB1_197_32737188_S | 0.882 | 0.841 | P | 0.89 | 0.92 | A | 1 | 2.93E-04 | 0.72 ( 0.60- 0.86) |
| 32737733 | AA_DQB1_185_32737733_I | 0.9865 | 0.971 | P | 0.28 | 0.23 | A | 1 | 2.11E-05 | 1.29 ( 1.15- 1.45) |
| 32737733 | AA_DQB1_185_32737733_T | 0.9855 | 0.97 | P | 0.72 | 0.77 | A | 1 | 2.11E-05 | 0.77 ( 0.69- 0.87) |
| 32737742 | AA_DQB1_182_32737742_N | 0.9746 | 0.961 | P | 0.47 | 0.42 | A | 1 | 1.16E-04 | 1.23 ( 1.11- 1.36) |
| 32737742 | AA_DQB1_182_32737742_S | 0.9737 | 0.96 | P | 0.53 | 0.58 | A | 1 | 1.16E-04 | 0.82 ( 0.74- 0.91) |
| 32737787 | AA_DQB1_167_32737787_H | 0.952 | 0.945 | P | 0.30 | 0.27 | A | 1 | 1.24E-02 | 1.16 ( 1.03- 1.30) |
| 32737787 | AA_DQB1_167_32737787_R | 0.9512 | 0.944 | P | 0.70 | 0.73 | A | 1 | 1.24E-02 | 0.86 ( 0.77- 0.97) |
| 32737868 | AA_DQB1_140_32737868_A | 0.9737 | 0.96 | P | 0.53 | 0.58 | A | 1 | 1.16E-04 | 0.82 ( 0.74- 0.91) |
| 32737868 | AA_DQB1_140_32737868_T | 0.9746 | 0.961 | P | 0.47 | 0.42 | A | 1 | 1.16E-04 | 1.23 ( 1.11- 1.36) |
| 32737898 | AA_DQB1_130_32737898_Q | 1.003 | 0.993 | P | 0.03 | 0.05 | A | 1 | 1.02E-04 | 0.59 ( 0.46- 0.77) |
| 32737898 | AA_DQB1_130_32737898_R | 0.9957 | 0.986 | P | 0.97 | 0.95 | A | 1 | 1.02E-04 | 1.69 ( 1.30- 2.20) |
| 32737910 | AA_DQB1_126_32737910_H | 1.0128 | 0.977 | P | 0.06 | 0.03 | A | 1 | 1.66E-04 | 1.62 ( 1.26- 2.09) |
| 32737910 | AA_DQB1_126_32737910_Q | 1.0098 | 0.973 | P | 0.94 | 0.97 | A | 1 | 1.66E-04 | 0.62 ( 0.48- 0.79) |
| 32737913 | AA_DQB1_125_32737913_A | 0.9756 | 0.961 | P | 0.58 | 0.60 | A | 1 | 1.46E-01 | 0.93 ( 0.83- 1.03) |
| 32737913 | AA_DQB1_125_32737913_G | 0.9469 | 0.936 | P | 0.29 | 0.28 | A | 1 | 2.06E-01 | 1.08 ( 0.96- 1.21) |
| 32737913 | AA_DQB1_125_32737913_S | 0.9825 | 0.963 | P | 0.13 | 0.12 | A | 1 | 6.29E-01 | 1.04 ( 0.89- 1.21) |
| 32737940 | AA_DQB1_116_32737940_I | 0.9817 | 0.962 | P | 0.13 | 0.12 | A | 1 | 6.29E-01 | 1.04 ( 0.89- 1.21) |
| 32737940 | AA_DQB1_116_32737940_V | 0.9806 | 0.961 | P | 0.87 | 0.88 | A | 1 | 6.29E-01 | 0.96 ( 0.83- 1.12) |
| 32739039 | HLA_DQB1_02 | 1.0048 | 0.98 | P | 0.11 | 0.18 | A | 1 | 2.31E-13 | 0.57 ( 0.49- 0.66) |
| 32739039 | HLA_DQB1_0201 | 1.0042 | 0.98 | P | 0.11 | 0.18 | A | 1 | 2.31E-13 | 0.57 ( 0.49- 0.66) |
| 32739039 | HLA_DQB1_03 | 0.9833 | 0.959 | P | 0.40 | 0.37 | A | 1 | 1.97E-02 | 1.13 ( 1.02- 1.26) |
| 32739039 | HLA_DQB1_0301 | 0.9636 | 0.95 | P | 0.19 | 0.19 | A | 1 | 8.33E-01 | 1.01 ( 0.89- 1.16) |
| 32739039 | HLA_DQB1_0302 | 0.9478 | 0.933 | P | 0.04 | 0.05 | A | 1 | 1.90E-01 | 0.85 ( 0.67- 1.08) |
| 32739039 | HLA_DQB1_0303 | 1.0155 | 0.976 | P | 0.16 | 0.13 | A | 1 | 1.59E-04 | 1.32 ( 1.14- 1.52) |
| 32739039 | HLA_DQB1_04 | 0.9971 | 0.997 | P | 0.07 | 0.05 | A | 1 | 1.01E-03 | 1.43 ( 1.16- 1.77) |
| 32739039 | HLA_DQB1_0401 | 0.9651 | 0.976 | P | 0.06 | 0.04 | A | 1 | 4.55E-03 | 1.4 ( 1.11- 1.77) |
| 32739039 | HLA_DQB1_0402 | 0.9116 | 0.902 | P | 0.01 | 0.01 | A | 1 | 1.17E-01 | 1.5 ( 0.90- 2.48) |
| 32739039 | HLA_DQB1_05 | 0.9822 | 0.962 | P | 0.13 | 0.12 | A | 1 | 6.56E-01 | 1.04 ( 0.89- 1.21) |
| 32739039 | HLA_DQB1_0501 | 0.9179 | 0.922 | P | 0.04 | 0.05 | A | 1 | 9.73E-03 | 0.71 ( 0.55- 0.92) |
| 32739039 | HLA_DQB1_0502 | 1.0126 | 0.977 | P | 0.05 | 0.03 | A | 1 | 2.04E-04 | 1.61 ( 1.25- 2.07) |
| 32739039 | HLA_DQB1_0503 | 1.0264 | 0.995 | P | 0.03 | 0.04 | A | 1 | 5.40E-01 | 0.92 ( 0.70- 1.21) |
| 32739039 | HLA_DQB1_06 | 0.9468 | 0.936 | P | 0.29 | 0.28 | A | 1 | 2.06E-01 | 1.08 ( 0.96- 1.21) |
| 32739039 | HLA_DQB1_0601 | 0.8842 | 0.843 | P | 0.11 | 0.08 | A | 1 | 3.42E-04 | 1.39 ( 1.16- 1.66) |
| 32739039 | HLA_DQB1_0602 | 0.9326 | 0.99 | P | 0.14 | 0.13 | A | 1 | 1.92E-01 | 1.11 ( 0.95- 1.30) |
| 32739039 | HLA_DQB1_0603 | 1.0024 | 0.983 | P | 0.02 | 0.02 | A | 1 | 4.60E-01 | 0.87 ( 0.59- 1.27) |
| 32739039 | HLA_DQB1_0604 | 0.9829 | 0.997 | P | 0.02 | 0.03 | A | 1 | 5.07E-03 | 0.63 ( 0.45- 0.87) |
| 32739039 | HLA_DQB1_0609 | 0.9974 | 0.983 | P | 0.01 | 0.02 | A | 1 | 4.60E-03 | 0.52 ( 0.33- 0.82) |
| 32740567 | AA_DQB1_90_32740567_I | 0.9692 | 0.955 | P | 0.42 | 0.40 | A | 1 | 1.53E-01 | 1.08 ( 0.97- 1.20) |
| 32740567 | AA_DQB1_90_32740567_T | 0.969 | 0.955 | P | 0.58 | 0.60 | A | 1 | 1.53E-01 | 0.93 ( 0.84- 1.03) |
| 32740570 | AA_DQB1_89_32740570_G | 0.9692 | 0.955 | P | 0.42 | 0.40 | A | 1 | 1.53E-01 | 1.08 ( 0.97- 1.20) |
| 32740570 | AA_DQB1_89_32740570_T | 0.9691 | 0.955 | P | 0.58 | 0.60 | A | 1 | 1.53E-01 | 0.93 ( 0.84- 1.03) |
| 32740576 | AA_DQB1_87_32740576_F | 0.9333 | 0.928 | P | 0.26 | 0.23 | A | 1 | 1.30E-03 | 1.22 ( 1.08- 1.38) |
| 32740576 | AA_DQB1_87_32740576_L | 0.969 | 0.955 | P | 0.58 | 0.60 | A | 1 | 1.53E-01 | 0.93 ( 0.84- 1.03) |
| 32740576 | AA_DQB1_87_32740576_Y | 0.9579 | 0.958 | P | 0.16 | 0.17 | A | 1 | 7.18E-02 | 0.88 ( 0.77- 1.01) |
| 32740579 | AA_DQB1_86_32740579_A | 0.973 | 0.952 | P | 0.39 | 0.35 | A | 1 | 1.86E-03 | 1.18 ( 1.06- 1.32) |
| 32740579 | AA_DQB1_86_32740579_E | 0.9691 | 0.955 | P | 0.58 | 0.60 | A | 1 | 1.53E-01 | 0.93 ( 0.84- 1.03) |
| 32740579 | AA_DQB1_86_32740579_G | 1.0024 | 0.993 | P | 0.03 | 0.05 | A | 1 | 7.68E-05 | 0.59 ( 0.45- 0.76) |
| 32740582 | AA_DQB1_85_32740582_L | 0.969 | 0.955 | P | 0.58 | 0.60 | A | 1 | 1.53E-01 | 0.93 ( 0.84- 1.03) |
| 32740582 | AA_DQB1_85_32740582_V | 0.969 | 0.955 | P | 0.42 | 0.40 | A | 1 | 1.53E-01 | 1.08 ( 0.97- 1.20) |
| 32740585 | AA_DQB1_84_32740585_E | 0.9691 | 0.955 | P | 0.42 | 0.40 | A | 1 | 1.53E-01 | 1.08 ( 0.97- 1.20) |
| 32740585 | AA_DQB1_84_32740585_Q | 0.969 | 0.955 | P | 0.58 | 0.60 | A | 1 | 1.53E-01 | 0.93 ( 0.84- 1.03) |
| 32740606 | AA_DQB1_77_32740606 | 0.9651 | 0.959 | R | 0.23 | 0.30 | T | 1 | 1.78E-08 | 0.71 ( 0.63- 0.80) |
| 32740612 | AA_DQB1_75_32740612 | 0.9634 | 0.963 | V | 0.31 | 0.35 | L | 1 | 2.37E-04 | 0.81 ( 0.73- 0.91) |
| 32740615 | AA_DQB1_74_32740615_A | 1.0039 | 0.979 | P | 0.11 | 0.18 | A | 1 | 1.37E-13 | 0.57 ( 0.49- 0.66) |
| 32740615 | AA_DQB1_74_32740615_E | 0.9638 | 0.963 | P | 0.69 | 0.65 | A | 1 | 2.37E-04 | 1.23 ( 1.10- 1.37) |
| 32740615 | AA_DQB1_74_32740615_S | 0.9583 | 0.962 | P | 0.20 | 0.18 | A | 1 | 1.85E-02 | 1.17 ( 1.03- 1.34) |
| 32740624 | AA_DQB1_71_32740624_A | 0.9678 | 0.948 | P | 0.13 | 0.12 | A | 1 | 7.13E-01 | 1.03 ( 0.88- 1.20) |
| 32740624 | AA_DQB1_71_32740624_D | 0.9976 | 0.997 | P | 0.07 | 0.05 | A | 1 | 1.46E-03 | 1.41 ( 1.14- 1.75) |
| 32740624 | AA_DQB1_71_32740624_K | 1.0024 | 0.978 | P | 0.11 | 0.18 | A | 1 | 1.37E-13 | 0.57 ( 0.49- 0.66) |
| 32740624 | AA_DQB1_71_32740624_T | 0.9633 | 0.963 | P | 0.69 | 0.65 | A | 1 | 2.37E-04 | 1.23 ( 1.10- 1.37) |
| 32740627 | AA_DQB1_70_32740627_E | 0.9962 | 0.995 | P | 0.07 | 0.05 | A | 1 | 1.46E-03 | 1.41 ( 1.14- 1.75) |
| 32740627 | AA_DQB1_70_32740627_G | 0.9451 | 0.969 | P | 0.28 | 0.27 | A | 1 | 3.05E-01 | 1.06 ( 0.95- 1.19) |
| 32740627 | AA_DQB1_70_32740627_R | 0.9396 | 0.971 | P | 0.65 | 0.68 | A | 1 | 8.00E-03 | 0.86 ( 0.77- 0.96) |
| 32740636 | AA_DQB1_67_32740636 | 0.9806 | 0.94 | I | 0.29 | 0.31 | V | 1 | 7.86E-02 | 0.91 ( 0.81- 1.01) |
| 32740639 | AA_DQB1_66_32740639 | 0.9799 | 0.94 | D | 0.29 | 0.31 | E | 1 | 7.86E-02 | 0.91 ( 0.81- 1.01) |
| 32740666 | AA_DQB1_57_32740666_A | 0.9956 | 0.966 | P | 0.15 | 0.23 | A | 1 | 2.66E-13 | 0.61 ( 0.53- 0.70) |
| 32740666 | AA_DQB1_57_32740666_D | 0.9627 | 0.951 | P | 0.73 | 0.64 | A | 1 | 1.79E-13 | 1.52 ( 1.36- 1.70) |
| 32740666 | AA_DQB1_57_32740666_S | 0.975 | 0.941 | P | 0.05 | 0.03 | A | 1 | 3.38E-04 | 1.58 ( 1.23- 2.03) |
| 32740666 | AA_DQB1_57_32740666_V | 0.9311 | 0.953 | P | 0.07 | 0.10 | A | 1 | 1.63E-06 | 0.63 ( 0.52- 0.76) |
| 32740669 | AA_DQB1_56_32740669 | 0.9984 | 0.997 | L | 0.07 | 0.05 | P | 1 | 1.46E-03 | 1.41 ( 1.14- 1.75) |
| 32740672 | AA_DQB1_55_32740672_L | 1.0036 | 0.978 | P | 0.11 | 0.18 | A | 1 | 1.76E-13 | 0.57 ( 0.49- 0.66) |
| 32740672 | AA_DQB1_55_32740672_P | 0.9765 | 0.953 | P | 0.40 | 0.37 | A | 1 | 2.11E-02 | 1.13 ( 1.02- 1.26) |
| 32740672 | AA_DQB1_55_32740672_R | 0.9723 | 0.956 | P | 0.49 | 0.45 | A | 1 | 2.85E-03 | 1.17 ( 1.06- 1.30) |
| 32740678 | AA_DQB1_53_32740678 | 0.9688 | 0.955 | Q | 0.42 | 0.40 | L | 1 | 1.53E-01 | 1.08 ( 0.97- 1.20) |
| 32740681 | AA_DQB1_52_32740681 | 1.0042 | 0.979 | L | 0.11 | 0.18 | P | 1 | 1.76E-13 | 0.57 ( 0.49- 0.66) |
| 32740696 | AA_DQB1_47_32740696 | 1.0042 | 0.979 | F | 0.11 | 0.18 | Y | 1 | 1.76E-13 | 0.57 ( 0.49- 0.66) |
| 32740699 | AA_DQB1_46_32740699 | 1.0042 | 0.979 | E | 0.11 | 0.18 | V | 1 | 1.76E-13 | 0.57 ( 0.49- 0.66) |
| 32740702 | AA_DQB1_45_32740702 | 0.9526 | 0.94 | E | 0.19 | 0.19 | G | 1 | 9.08E-01 | 1.01 ( 0.89- 1.15) |
| 32740723 | AA_DQB1_38_32740723 | 0.9714 | 0.95 | V | 0.34 | 0.38 | A | 1 | 2.51E-03 | 0.85 ( 0.76- 0.94) |
| 32740726 | AA_DQB1_37_32740726_D | 0.8846 | 0.844 | P | 0.11 | 0.08 | A | 1 | 3.42E-04 | 1.39 ( 1.16- 1.66) |
| 32740726 | AA_DQB1_37_32740726_I | 1.0035 | 0.978 | P | 0.11 | 0.18 | A | 1 | 1.76E-13 | 0.57 ( 0.49- 0.66) |
| 32740726 | AA_DQB1_37_32740726_Y | 0.9485 | 0.928 | P | 0.78 | 0.74 | A | 1 | 1.76E-04 | 1.26 ( 1.12- 1.42) |
| 32740747 | AA_DQB1_30_32740747_H | 0.9588 | 0.957 | P | 0.16 | 0.17 | A | 1 | 2.73E-01 | 0.93 ( 0.81- 1.06) |
| 32740747 | AA_DQB1_30_32740747_S | 1.0035 | 0.978 | P | 0.11 | 0.18 | A | 1 | 1.76E-13 | 0.57 ( 0.49- 0.66) |
| 32740747 | AA_DQB1_30_32740747_Y | 0.9618 | 0.961 | P | 0.73 | 0.65 | A | 1 | 5.60E-11 | 1.46 ( 1.30- 1.63) |
| 32740753 | AA_DQB1_28_32740753 | 1.0035 | 0.978 | S | 0.11 | 0.18 | T | 1 | 1.76E-13 | 0.57 ( 0.49- 0.66) |
| 32740759 | AA_DQB1_26_32740759_G | 0.9579 | 0.961 | P | 0.20 | 0.18 | A | 1 | 1.54E-02 | 1.18 ( 1.03- 1.35) |
| 32740759 | AA_DQB1_26_32740759_L | 0.9778 | 0.967 | P | 0.50 | 0.55 | A | 1 | 6.60E-05 | 0.81 ( 0.73- 0.90) |
| 32740759 | AA_DQB1_26_32740759_Y | 0.9435 | 0.937 | P | 0.30 | 0.27 | A | 1 | 1.69E-02 | 1.15 ( 1.03- 1.29) |
| 32740768 | AA_DQB1_23_32740768 | 0.966 | 0.977 | L | 0.06 | 0.04 | R | 1 | 4.55E-03 | 1.4 ( 1.11- 1.77) |
| 32740795 | AA_DQB1_14_32740795 | 0.9603 | 0.941 | L | 0.13 | 0.12 | M | 1 | 6.85E-01 | 1.03 ( 0.88- 1.21) |
| 32740798 | AA_DQB1_13_32740798 | 0.9434 | 0.937 | A | 0.30 | 0.27 | G | 1 | 1.69E-02 | 1.15 ( 1.03- 1.29) |
| 32740810 | AA_DQB1_9_32740810_F | 0.9603 | 0.992 | P | 0.21 | 0.18 | A | 1 | 1.79E-03 | 1.23 ( 1.08- 1.41) |
| 32740810 | AA_DQB1_9_32740810_L | 0.8846 | 0.844 | P | 0.11 | 0.08 | A | 1 | 3.42E-04 | 1.39 ( 1.16- 1.66) |
| 32740810 | AA_DQB1_9_32740810_Y | 0.9559 | 0.936 | P | 0.68 | 0.74 | A | 1 | 6.85E-07 | 0.75 ( 0.67- 0.84) |
| 32742259 | AA_DQB1_3_32742259_P | 0.8848 | 0.844 | P | 0.11 | 0.08 | A | 1 | 3.42E-04 | 1.39 ( 1.16- 1.66) |
| 32742259 | AA_DQB1_3_32742259_S | 0.8563 | 0.815 | P | 0.89 | 0.92 | A | 1 | 3.42E-04 | 0.72 ( 0.60- 0.86) |
| 32742268 | AA_DQB1_-1_32742268 | 0.8855 | 0.891 | x | 0.02 | 0.03 | G | 1 | 8.84E-03 | 0.65 ( 0.47- 0.90) |
| 32742271 | AA_DQB1_-2_32742271 | 0.8881 | 0.893 | x | 0.02 | 0.03 | E | 1 | 8.84E-03 | 0.65 ( 0.47- 0.90) |
| 32742274 | AA_DQB1_-3_32742274 | 0.8881 | 0.893 | x | 0.02 | 0.03 | A | 1 | 8.84E-03 | 0.65 ( 0.47- 0.90) |
| 32742277 | AA_DQB1_-4_32742277_L | 0.9316 | 0.956 | P | 0.29 | 0.29 | A | 1 | 7.90E-01 | 1.02 ( 0.91- 1.14) |
| 32742277 | AA_DQB1_-4_32742277_V | 0.9473 | 0.974 | P | 0.69 | 0.68 | A | 1 | 4.94E-01 | 1.04 ( 0.93- 1.16) |
| 32742277 | AA_DQB1_-4_32742277_x | 0.8881 | 0.893 | P | 0.02 | 0.03 | A | 1 | 8.84E-03 | 0.65 ( 0.47- 0.90) |
| 32742280 | AA_DQB1_-5_32742280_L | 0.9395 | 0.975 | P | 0.16 | 0.16 | A | 1 | 9.66E-01 | 1 ( 0.87- 1.15) |
| 32742280 | AA_DQB1_-5_32742280_P | 0.9473 | 0.974 | P | 0.69 | 0.68 | A | 1 | 4.94E-01 | 1.04 ( 0.93- 1.16) |
| 32742280 | AA_DQB1_-5_32742280_S | 0.9685 | 0.949 | P | 0.13 | 0.12 | A | 1 | 6.85E-01 | 1.03 ( 0.88- 1.21) |
| 32742280 | AA_DQB1_-5_32742280_x | 0.8881 | 0.893 | P | 0.02 | 0.03 | A | 1 | 8.84E-03 | 0.65 ( 0.47- 0.90) |
| 32742283 | AA_DQB1_-6_32742283_A | 0.9665 | 0.978 | P | 0.06 | 0.04 | A | 1 | 4.55E-03 | 1.4 ( 1.11- 1.77) |
| 32742283 | AA_DQB1_-6_32742283_S | 0.9316 | 0.956 | P | 0.29 | 0.29 | A | 1 | 7.90E-01 | 1.02 ( 0.91- 1.14) |
| 32742283 | AA_DQB1_-6_32742283_T | 0.9447 | 0.971 | P | 0.63 | 0.64 | A | 1 | 5.04E-01 | 0.96 ( 0.87- 1.07) |
| 32742283 | AA_DQB1_-6_32742283_x | 0.8882 | 0.893 | P | 0.02 | 0.03 | A | 1 | 8.84E-03 | 0.65 ( 0.47- 0.90) |
| 32742286 | AA_DQB1_-7_32742286 | 0.8882 | 0.893 | x | 0.02 | 0.03 | S | 1 | 8.84E-03 | 0.65 ( 0.47- 0.90) |
| 32742289 | AA_DQB1_-8_32742289 | 0.8882 | 0.893 | x | 0.02 | 0.03 | L | 1 | 8.84E-03 | 0.65 ( 0.47- 0.90) |
| 32742292 | AA_DQB1_-9_32742292_I | 0.9686 | 0.949 | P | 0.13 | 0.12 | A | 1 | 6.85E-01 | 1.03 ( 0.88- 1.21) |
| 32742292 | AA_DQB1_-9_32742292_M | 0.9398 | 0.936 | P | 0.85 | 0.84 | A | 1 | 4.07E-01 | 1.06 ( 0.92- 1.23) |
| 32742292 | AA_DQB1_-9_32742292_x | 0.8882 | 0.893 | P | 0.02 | 0.03 | A | 1 | 8.84E-03 | 0.65 ( 0.47- 0.90) |
| 32742295 | AA_DQB1_-10_32742295_A | 0.9758 | 0.96 | P | 0.87 | 0.79 | A | 1 | 1.18E-15 | 1.78 ( 1.54- 2.05) |
| 32742295 | AA_DQB1_-10_32742295_S | 1.0037 | 0.979 | P | 0.11 | 0.18 | A | 1 | 1.76E-13 | 0.57 ( 0.49- 0.66) |
| 32742295 | AA_DQB1_-10_32742295_x | 0.8882 | 0.893 | P | 0.02 | 0.03 | A | 1 | 8.84E-03 | 0.65 ( 0.47- 0.90) |
| 32742298 | AA_DQB1_-11_32742298 | 0.8882 | 0.893 | x | 0.02 | 0.03 | L | 1 | 8.84E-03 | 0.65 ( 0.47- 0.90) |
| 32742301 | AA_DQB1_-12_32742301 | 0.8882 | 0.893 | x | 0.02 | 0.03 | M | 1 | 8.84E-03 | 0.65 ( 0.47- 0.90) |
| 32742304 | AA_DQB1_-13_32742304 | 0.8882 | 0.893 | x | 0.02 | 0.03 | L | 1 | 8.84E-03 | 0.65 ( 0.47- 0.90) |
| 32742307 | AA_DQB1_-14_32742307 | 0.8882 | 0.893 | x | 0.02 | 0.03 | T | 1 | 8.84E-03 | 0.65 ( 0.47- 0.90) |
| 32742310 | AA_DQB1_-15_32742310 | 0.8882 | 0.893 | x | 0.02 | 0.03 | V | 1 | 8.84E-03 | 0.65 ( 0.47- 0.90) |
| 32742313 | AA_DQB1_-16_32742313 | 0.8882 | 0.893 | x | 0.02 | 0.03 | T | 1 | 8.84E-03 | 0.65 ( 0.47- 0.90) |
| 32742316 | AA_DQB1_-17_32742316_A | 0.8836 | 0.851 | P | 0.87 | 0.89 | A | 1 | 6.05E-02 | 0.86 ( 0.73- 1.01) |
| 32742316 | AA_DQB1_-17_32742316_P | 0.8848 | 0.844 | P | 0.11 | 0.08 | A | 1 | 3.42E-04 | 1.39 ( 1.16- 1.66) |
| 32742316 | AA_DQB1_-17_32742316_x | 0.8882 | 0.893 | P | 0.02 | 0.03 | A | 1 | 8.84E-03 | 0.65 ( 0.47- 0.90) |
| 32742319 | AA_DQB1_-18_32742319_A | 0.9576 | 0.955 | P | 0.41 | 0.45 | A | 1 | 1.53E-03 | 0.85 ( 0.76- 0.94) |
| 32742319 | AA_DQB1_-18_32742319_V | 0.9577 | 0.943 | P | 0.57 | 0.52 | A | 1 | 6.55E-05 | 1.23 ( 1.11- 1.37) |
| 32742319 | AA_DQB1_-18_32742319_x | 0.8882 | 0.893 | P | 0.02 | 0.03 | A | 1 | 8.84E-03 | 0.65 ( 0.47- 0.90) |
| 32742322 | AA_DQB1_-19_32742322 | 0.8882 | 0.893 | x | 0.02 | 0.03 | R | 1 | 8.84E-03 | 0.65 ( 0.47- 0.90) |
| 32742325 | AA_DQB1_-20_32742325 | 0.8882 | 0.893 | x | 0.02 | 0.03 | L | 1 | 8.84E-03 | 0.65 ( 0.47- 0.90) |
| 32742328 | AA_DQB1_-21_32742328_D | 0.9316 | 0.956 | P | 0.29 | 0.29 | A | 1 | 7.90E-01 | 1.02 ( 0.91- 1.14) |
| 32742328 | AA_DQB1_-21_32742328_G | 0.9473 | 0.974 | P | 0.69 | 0.68 | A | 1 | 4.94E-01 | 1.04 ( 0.93- 1.16) |
| 32742328 | AA_DQB1_-21_32742328_x | 0.8882 | 0.893 | P | 0.02 | 0.03 | A | 1 | 8.84E-03 | 0.65 ( 0.47- 0.90) |
| 32742331 | AA_DQB1_-22_32742331 | 0.8882 | 0.893 | x | 0.02 | 0.03 | G | 1 | 8.84E-03 | 0.65 ( 0.47- 0.90) |
| 32742334 | AA_DQB1_-23_32742334 | 0.8882 | 0.893 | x | 0.02 | 0.03 | P | 1 | 8.84E-03 | 0.65 ( 0.47- 0.90) |
| 32742337 | AA_DQB1_-24_32742337 | 0.8882 | 0.893 | x | 0.02 | 0.03 | I | 1 | 8.84E-03 | 0.65 ( 0.47- 0.90) |
| 32742340 | AA_DQB1_-25_32742340 | 0.8882 | 0.893 | x | 0.02 | 0.03 | R | 1 | 8.84E-03 | 0.65 ( 0.47- 0.90) |
| 32742343 | AA_DQB1_-26_32742343 | 0.8882 | 0.893 | x | 0.02 | 0.03 | L | 1 | 8.84E-03 | 0.65 ( 0.47- 0.90) |
| 32742346 | AA_DQB1_-27_32742346_A | 0.9398 | 0.936 | P | 0.85 | 0.84 | A | 1 | 4.07E-01 | 1.06 ( 0.92- 1.23) |
| 32742346 | AA_DQB1_-27_32742346_S | 0.9686 | 0.949 | P | 0.13 | 0.12 | A | 1 | 6.85E-01 | 1.03 ( 0.88- 1.21) |
| 32742346 | AA_DQB1_-27_32742346_x | 0.8883 | 0.894 | P | 0.02 | 0.03 | A | 1 | 8.84E-03 | 0.65 ( 0.47- 0.90) |
| 32742349 | AA_DQB1_-28_32742349 | 0.8883 | 0.894 | x | 0.02 | 0.03 | K | 1 | 8.84E-03 | 0.65 ( 0.47- 0.90) |
| 32742352 | AA_DQB1_-29_32742352 | 0.8883 | 0.894 | x | 0.02 | 0.03 | K | 1 | 8.84E-03 | 0.65 ( 0.47- 0.90) |
| 32742355 | AA_DQB1_-30_32742355 | 0.8883 | 0.894 | x | 0.02 | 0.03 | W | 1 | 8.84E-03 | 0.65 ( 0.47- 0.90) |
| 32742358 | AA_DQB1_-31_32742358 | 0.8883 | 0.894 | x | 0.02 | 0.03 | S | 1 | 8.84E-03 | 0.65 ( 0.47- 0.90) |
| 32742361 | AA_DQB1_-32_32742361 | 0.8921 | 0.898 | x | 0.02 | 0.03 | M | 1 | 8.84E-03 | 0.65 ( 0.47- 0.90) |
| 33144412 | AA_DPA1_228_33144412 | 0.9717 | 1 | T | 0.31 | 0.39 | P | 1 | 2.74E-10 | 0.7 ( 0.63- 0.78) |
| 33144526 | AA_DPA1_190_33144526 | 0.9278 | 0.897 | A | 0.01 | 0.02 | T | 1 | 7.79E-02 | 0.66 ( 0.42- 1.05) |
| 33144830 | AA_DPA1_160_33144830 | 0.9714 | 0.999 | F | 0.31 | 0.39 | V | 1 | 2.74E-10 | 0.7 ( 0.63- 0.78) |
| 33144929 | AA_DPA1_127_33144929 | 0.9713 | 1 | L | 0.31 | 0.39 | P | 1 | 3.29E-10 | 0.7 ( 0.63- 0.78) |
| 33144977 | AA_DPA1_111_33144977 | 0.9589 | 0.994 | K | 0.32 | 0.41 | R | 1 | 2.69E-11 | 0.69 ( 0.62- 0.77) |
| 33145022 | AA_DPA1_96_33145022 | 0.9303 | 0.906 | A | 0.01 | 0.02 | P | 1 | 9.98E-02 | 0.68 ( 0.44- 1.08) |
| 33145064 | HLA_DPA1_01 | 0.971 | 0.999 | P | 0.313 | 0.390 | A | 1 | 3.29E-10 | 0.7 ( 0.63- 0.78) |
| 33145064 | HLA_DPA1_0103 | 0.9712 | 1 | P | 0.313 | 0.390 | A | 1 | 3.89E-10 | 0.7 ( 0.63- 0.79) |
| 33145064 | HLA_DPA1_02 | 0.9586 | 0.994 | P | 0.676 | 0.595 | A | 1 | 3.21E-11 | 1.45 ( 1.30- 1.62) |
| 33145064 | HLA_DPA1_0201 | 0.9013 | 0.9 | P | 0.081 | 0.147 | A | 1 | 2.88E-15 | 0.5 ( 0.42- 0.60) |
| 33145064 | HLA_DPA1_0202 | 0.9175 | 0.954 | P | 0.595 | 0.448 | A | 1 | 1.76E-31 | 1.91 ( 1.71- 2.13) |
| 33145064 | HLA_DPA1_04 | 0.9154 | 0.892 | P | 0.011 | 0.016 | A | 1 | 9.98E-02 | 0.68 ( 0.44- 1.08) |
| 33145064 | HLA_DPA1_0401 | 0.9328 | 0.907 | P | 0.011 | 0.016 | A | 1 | 9.98E-02 | 0.68 ( 0.44- 1.08) |
| 33145401 | AA_DPA1_83_33145401 | 0.9712 | 0.999 | T | 0.31 | 0.39 | A | 1 | 3.89E-10 | 0.7 ( 0.63- 0.79) |
| 33145431 | AA_DPA1_73_33145431 | 0.9275 | 0.903 | A | 0.01 | 0.02 | L | 1 | 9.98E-02 | 0.68 ( 0.44- 1.08) |
| 33145434 | AA_DPA1_72_33145434 | 0.9321 | 0.906 | I | 0.01 | 0.02 | T | 1 | 9.98E-02 | 0.68 ( 0.44- 1.08) |
| 33145500 | AA_DPA1_50_33145500 | 0.9708 | 0.999 | Q | 0.31 | 0.39 | R | 1 | 3.89E-10 | 0.7 ( 0.63- 0.79) |
| 33145557 | AA_DPA1_31_33145557 | 0.9578 | 0.993 | M | 0.32 | 0.41 | Q | 1 | 3.21E-11 | 0.69 ( 0.62- 0.77) |
| 33145566 | AA_DPA1_28_33145566 | 0.9338 | 0.906 | D | 0.01 | 0.02 | E | 1 | 9.98E-02 | 0.68 ( 0.44- 1.08) |
| 33145596 | AA_DPA1_18_33145596 | 0.9302 | 0.904 | T | 0.01 | 0.02 | P | 1 | 9.98E-02 | 0.68 ( 0.44- 1.08) |
| 33145617 | AA_DPA1_11_33145617 | 0.9198 | 0.957 | M | 0.60 | 0.45 | A | 1 | 1.76E-31 | 1.91 ( 1.71- 2.13) |
| 33145623 | AA_DPA1_9_33145623 | 0.958 | 0.933 | x | 0.01 | 0.02 | Y | 1 | 7.72E-02 | 0.66 ( 0.42- 1.05) |
| 33145626 | AA_DPA1_8_33145626 | 0.9443 | 0.923 | x | 0.01 | 0.02 | T | 1 | 7.72E-02 | 0.66 ( 0.42- 1.05) |
| 33145629 | AA_DPA1_7_33145629 | 0.9269 | 0.959 | x | 0.61 | 0.46 | S | 1 | 2.14E-28 | 1.86 ( 1.66- 2.07) |
| 33145632 | AA_DPA1_6_33145632 | 0.9271 | 0.959 | x | 0.61 | 0.46 | V | 1 | 2.14E-28 | 1.86 ( 1.66- 2.07) |
| 33145635 | AA_DPA1_5_33145635 | 0.9272 | 0.959 | x | 0.61 | 0.46 | H | 1 | 2.14E-28 | 1.86 ( 1.66- 2.07) |
| 33145638 | AA_DPA1_4_33145638 | 0.9271 | 0.959 | x | 0.61 | 0.46 | D | 1 | 2.14E-28 | 1.86 ( 1.66- 2.07) |
| 33145641 | AA_DPA1_3_33145641 | 0.9273 | 0.959 | x | 0.61 | 0.46 | A | 1 | 2.14E-28 | 1.86 ( 1.66- 2.07) |
| 33149228 | AA_DPA1_2_33149228 | 0.929 | 0.96 | x | 0.60 | 0.46 | K | 1 | 1.88E-28 | 1.85 ( 1.66- 2.07) |
| 33149231 | AA_DPA1_1_33149231 | 0.9299 | 0.961 | x | 0.60 | 0.46 | I | 1 | 1.88E-28 | 1.85 ( 1.66- 2.07) |
| 33149234 | AA_DPA1_-1_33149234 | 0.9708 | 0.999 | A | 0.31 | 0.39 | x | 1 | 4.01E-10 | 0.7 ( 0.63- 0.79) |
| 33149237 | AA_DPA1_-2_33149237 | 0.9708 | 0.999 | G | 0.31 | 0.39 | x | 1 | 4.01E-10 | 0.7 ( 0.63- 0.79) |
| 33149240 | AA_DPA1_-3_33149240 | 0.9708 | 0.999 | A | 0.31 | 0.39 | x | 1 | 4.01E-10 | 0.7 ( 0.63- 0.79) |
| 33149243 | AA_DPA1_-4_33149243 | 0.9708 | 0.999 | G | 0.31 | 0.39 | x | 1 | 4.01E-10 | 0.7 ( 0.63- 0.79) |
| 33149246 | AA_DPA1_-5_33149246 | 0.9708 | 0.999 | R | 0.31 | 0.39 | x | 1 | 4.01E-10 | 0.7 ( 0.63- 0.79) |
| 33149249 | AA_DPA1_-6_33149249 | 0.9708 | 0.999 | L | 0.31 | 0.39 | x | 1 | 4.01E-10 | 0.7 ( 0.63- 0.79) |
| 33149252 | AA_DPA1_-7_33149252 | 0.9707 | 0.999 | S | 0.31 | 0.39 | x | 1 | 4.01E-10 | 0.7 ( 0.63- 0.79) |
| 33149255 | AA_DPA1_-8_33149255 | 0.9708 | 0.999 | L | 0.31 | 0.39 | x | 1 | 4.01E-10 | 0.7 ( 0.63- 0.79) |
| 33149258 | AA_DPA1_-9_33149258 | 0.9708 | 0.999 | L | 0.31 | 0.39 | x | 1 | 4.01E-10 | 0.7 ( 0.63- 0.79) |
| 33149261 | AA_DPA1_-10_33149261 | 0.9707 | 0.999 | F | 0.31 | 0.39 | x | 1 | 4.01E-10 | 0.7 ( 0.63- 0.79) |
| 33149264 | AA_DPA1_-11_33149264 | 0.9707 | 0.999 | A | 0.31 | 0.39 | x | 1 | 4.01E-10 | 0.7 ( 0.63- 0.79) |
| 33149267 | AA_DPA1_-12_33149267 | 0.9707 | 0.999 | L | 0.31 | 0.39 | x | 1 | 4.01E-10 | 0.7 ( 0.63- 0.79) |
| 33149270 | AA_DPA1_-13_33149270 | 0.9707 | 0.999 | S | 0.31 | 0.39 | x | 1 | 4.01E-10 | 0.7 ( 0.63- 0.79) |
| 33149273 | AA_DPA1_-14_33149273 | 0.9707 | 0.999 | L | 0.31 | 0.39 | x | 1 | 4.01E-10 | 0.7 ( 0.63- 0.79) |
| 33149276 | AA_DPA1_-15_33149276 | 0.9707 | 0.999 | A | 0.31 | 0.39 | x | 1 | 4.01E-10 | 0.7 ( 0.63- 0.79) |
| 33149279 | AA_DPA1_-16_33149279 | 0.9707 | 0.999 | R | 0.31 | 0.39 | x | 1 | 4.01E-10 | 0.7 ( 0.63- 0.79) |
| 33149282 | AA_DPA1_-17_33149282 | 0.9707 | 0.999 | L | 0.31 | 0.39 | x | 1 | 4.01E-10 | 0.7 ( 0.63- 0.79) |
| 33149285 | AA_DPA1_-18_33149285 | 0.9707 | 0.999 | I | 0.31 | 0.39 | x | 1 | 4.01E-10 | 0.7 ( 0.63- 0.79) |
| 33149288 | AA_DPA1_-19_33149288 | 0.9707 | 0.999 | V | 0.31 | 0.39 | x | 1 | 4.01E-10 | 0.7 ( 0.63- 0.79) |
| 33149291 | AA_DPA1_-20_33149291 | 0.9706 | 0.999 | A | 0.31 | 0.39 | x | 1 | 4.01E-10 | 0.7 ( 0.63- 0.79) |
| 33149294 | AA_DPA1_-21_33149294 | 0.9707 | 0.999 | R | 0.31 | 0.39 | x | 1 | 4.01E-10 | 0.7 ( 0.63- 0.79) |
| 33149297 | AA_DPA1_-22_33149297 | 0.9707 | 0.999 | I | 0.31 | 0.39 | x | 1 | 4.01E-10 | 0.7 ( 0.63- 0.79) |
| 33149300 | AA_DPA1_-23_33149300 | 0.9707 | 0.999 | H | 0.31 | 0.39 | x | 1 | 4.01E-10 | 0.7 ( 0.63- 0.79) |
| 33149303 | AA_DPA1_-24_33149303 | 0.9707 | 0.999 | F | 0.31 | 0.39 | x | 1 | 4.01E-10 | 0.7 ( 0.63- 0.79) |
| 33149306 | AA_DPA1_-25_33149306 | 0.9707 | 0.999 | M | 0.31 | 0.39 | x | 1 | 4.01E-10 | 0.7 ( 0.63- 0.79) |
| 33149309 | AA_DPA1_-26_33149309 | 0.9707 | 0.999 | R | 0.31 | 0.39 | x | 1 | 4.01E-10 | 0.7 ( 0.63- 0.79) |
| 33149312 | AA_DPA1_-27_33149312 | 0.9707 | 0.999 | D | 0.31 | 0.39 | x | 1 | 4.01E-10 | 0.7 ( 0.63- 0.79) |
| 33149315 | AA_DPA1_-28_33149315 | 0.9707 | 0.999 | E | 0.31 | 0.39 | x | 1 | 4.01E-10 | 0.7 ( 0.63- 0.79) |
| 33149318 | AA_DPA1_-29_33149318 | 0.9707 | 0.999 | P | 0.31 | 0.39 | x | 1 | 4.01E-10 | 0.7 ( 0.63- 0.79) |
| 33149321 | AA_DPA1_-30_33149321 | 0.9707 | 0.999 | R | 0.31 | 0.39 | x | 1 | 4.01E-10 | 0.7 ( 0.63- 0.79) |
| 33149324 | AA_DPA1_-31_33149324 | 0.9707 | 0.999 | M | 0.31 | 0.39 | x | 1 | 4.01E-10 | 0.7 ( 0.63- 0.79) |
| 33151798 | AA_DPB1_-29_33151798 | 0.9195 | 0.889 | x | 0.04 | 0.09 | M | 1 | 9.93E-15 | 0.41 ( 0.33- 0.51) |
| 33151801 | AA_DPB1_-28_33151801 | 0.9173 | 0.887 | x | 0.04 | 0.09 | M | 1 | 6.54E-15 | 0.41 ( 0.32- 0.51) |
| 33151804 | AA_DPB1_-27_33151804 | 0.9174 | 0.887 | x | 0.04 | 0.09 | V | 1 | 6.54E-15 | 0.41 ( 0.32- 0.51) |
| 33151807 | AA_DPB1_-26_33151807 | 0.9172 | 0.887 | x | 0.04 | 0.09 | L | 1 | 6.54E-15 | 0.41 ( 0.32- 0.51) |
| 33151810 | AA_DPB1_-25_33151810 | 0.9174 | 0.887 | x | 0.04 | 0.09 | Q | 1 | 6.54E-15 | 0.41 ( 0.32- 0.51) |
| 33151813 | AA_DPB1_-24_33151813 | 0.9174 | 0.887 | x | 0.04 | 0.09 | V | 1 | 6.54E-15 | 0.41 ( 0.32- 0.51) |
| 33151816 | AA_DPB1_-23_33151816 | 0.9171 | 0.887 | x | 0.04 | 0.09 | S | 1 | 6.54E-15 | 0.41 ( 0.32- 0.51) |
| 33151819 | AA_DPB1_-22_33151819 | 0.9174 | 0.887 | x | 0.04 | 0.09 | A | 1 | 6.54E-15 | 0.41 ( 0.32- 0.51) |
| 33151822 | AA_DPB1_-21_33151822 | 0.9174 | 0.887 | x | 0.04 | 0.09 | A | 1 | 6.54E-15 | 0.41 ( 0.32- 0.51) |
| 33151825 | AA_DPB1_-20_33151825 | 0.9174 | 0.887 | x | 0.04 | 0.09 | P | 1 | 6.54E-15 | 0.41 ( 0.32- 0.51) |
| 33151828 | AA_DPB1_-19_33151828 | 0.9173 | 0.887 | x | 0.04 | 0.09 | R | 1 | 6.54E-15 | 0.41 ( 0.32- 0.51) |
| 33151831 | AA_DPB1_-18_33151831 | 0.9173 | 0.887 | x | 0.04 | 0.09 | T | 1 | 6.54E-15 | 0.41 ( 0.32- 0.51) |
| 33151834 | AA_DPB1_-17_33151834 | 0.9172 | 0.887 | x | 0.04 | 0.09 | V | 1 | 6.54E-15 | 0.41 ( 0.32- 0.51) |
| 33151837 | AA_DPB1_-16_33151837 | 0.9174 | 0.887 | x | 0.04 | 0.09 | A | 1 | 6.54E-15 | 0.41 ( 0.32- 0.51) |
| 33151840 | AA_DPB1_-15_33151840 | 0.9174 | 0.887 | x | 0.04 | 0.09 | L | 1 | 6.54E-15 | 0.41 ( 0.32- 0.51) |
| 33151843 | AA_DPB1_-14_33151843 | 0.9173 | 0.887 | x | 0.04 | 0.09 | T | 1 | 6.54E-15 | 0.41 ( 0.32- 0.51) |
| 33151846 | AA_DPB1_-13_33151846 | 0.9172 | 0.887 | x | 0.04 | 0.09 | A | 1 | 6.54E-15 | 0.41 ( 0.32- 0.51) |
| 33151849 | AA_DPB1_-12_33151849 | 0.9174 | 0.887 | x | 0.04 | 0.09 | L | 1 | 6.54E-15 | 0.41 ( 0.32- 0.51) |
| 33151852 | AA_DPB1_-11_33151852 | 0.9174 | 0.887 | x | 0.04 | 0.09 | L | 1 | 6.54E-15 | 0.41 ( 0.32- 0.51) |
| 33151855 | AA_DPB1_-10_33151855 | 0.9173 | 0.887 | x | 0.04 | 0.09 | M | 1 | 6.54E-15 | 0.41 ( 0.32- 0.51) |
| 33151858 | AA_DPB1_-9_33151858 | 0.9173 | 0.887 | x | 0.04 | 0.09 | V | 1 | 6.54E-15 | 0.41 ( 0.32- 0.51) |
| 33151861 | AA_DPB1_-8_33151861 | 0.9174 | 0.887 | x | 0.04 | 0.09 | L | 1 | 6.54E-15 | 0.41 ( 0.32- 0.51) |
| 33151864 | AA_DPB1_-7_33151864 | 0.9174 | 0.887 | x | 0.04 | 0.09 | L | 1 | 6.54E-15 | 0.41 ( 0.32- 0.51) |
| 33151867 | AA_DPB1_-6_33151867 | 0.9172 | 0.887 | x | 0.04 | 0.09 | T | 1 | 6.54E-15 | 0.41 ( 0.32- 0.51) |
| 33151870 | AA_DPB1_-5_33151870 | 0.9173 | 0.887 | x | 0.04 | 0.09 | S | 1 | 6.54E-15 | 0.41 ( 0.32- 0.51) |
| 33151873 | AA_DPB1_-4_33151873 | 0.9174 | 0.887 | x | 0.04 | 0.09 | V | 1 | 6.54E-15 | 0.41 ( 0.32- 0.51) |
| 33151876 | AA_DPB1_-3_33151876 | 0.9173 | 0.887 | x | 0.04 | 0.09 | V | 1 | 6.54E-15 | 0.41 ( 0.32- 0.51) |
| 33151879 | AA_DPB1_-2_33151879 | 0.9173 | 0.887 | x | 0.04 | 0.09 | Q | 1 | 6.54E-15 | 0.41 ( 0.32- 0.51) |
| 33151882 | AA_DPB1_-1_33151882 | 0.9174 | 0.887 | x | 0.04 | 0.09 | G | 1 | 6.54E-15 | 0.41 ( 0.32- 0.51) |
| 33151885 | AA_DPB1_1_33151885 | 0.9173 | 0.887 | x | 0.04 | 0.09 | R | 1 | 6.54E-15 | 0.41 ( 0.32- 0.51) |
| 33151888 | AA_DPB1_2_33151888 | 0.9174 | 0.887 | x | 0.04 | 0.09 | A | 1 | 6.54E-15 | 0.41 ( 0.32- 0.51) |
| 33151891 | AA_DPB1_3_33151891 | 0.9175 | 0.887 | x | 0.04 | 0.09 | T | 1 | 6.54E-15 | 0.41 ( 0.32- 0.51) |
| 33151894 | AA_DPB1_4_33151894 | 0.9219 | 0.892 | x | 0.04 | 0.09 | P | 1 | 6.54E-15 | 0.41 ( 0.32- 0.51) |
| 33156427 | AA_DPB1_5_33156427 | 0.9272 | 0.898 | x | 0.04 | 0.09 | E | 1 | 1.76E-14 | 0.41 ( 0.33- 0.52) |
| 33156436 | AA_DPB1_8_33156436 | 0.9253 | 0.889 | V | 0.13 | 0.23 | L | 1 | 1.37E-21 | 0.51 ( 0.44- 0.58) |
| 33156439 | AA_DPB1_9_33156439_F | 0.9261 | 0.891 | P | 0.87 | 0.77 | A | 1 | 1.81E-21 | 1.96 ( 1.71- 2.26) |
| 33156439 | AA_DPB1_9_33156439_H | 0.9658 | 0.961 | P | 0.06 | 0.12 | A | 1 | 2.89E-14 | 0.48 ( 0.40- 0.58) |
| 33156439 | AA_DPB1_9_33156439_Y | 0.8669 | 0.821 | P | 0.07 | 0.11 | A | 1 | 1.26E-07 | 0.61 ( 0.51- 0.73) |
| 33156445 | AA_DPB1_11_33156445 | 0.9281 | 0.893 | L | 0.13 | 0.23 | G | 1 | 2.94E-21 | 0.51 ( 0.44- 0.59) |
| 33156517 | AA_DPB1_35_33156517_F | 0.943 | 0.967 | P | 0.46 | 0.58 | A | 1 | 1.28E-22 | 0.58 ( 0.52- 0.64) |
| 33156517 | AA_DPB1_35_33156517_L | 0.9272 | 0.962 | P | 0.51 | 0.37 | A | 1 | 8.73E-29 | 1.92 ( 1.72- 2.15) |
| 33156517 | AA_DPB1_35_33156517_Y | 0.9406 | 0.917 | P | 0.03 | 0.05 | A | 1 | 2.98E-04 | 0.61 ( 0.47- 0.80) |
| 33156520 | AA_DPB1_36_33156520 | 0.9538 | 0.938 | A | 0.14 | 0.16 | V | 1 | 1.67E-02 | 0.84 ( 0.72- 0.97) |
| 33156577 | AA_DPB1_55_33156577_A | 0.9548 | 0.938 | P | 0.13 | 0.16 | A | 1 | 1.49E-02 | 0.83 ( 0.72- 0.97) |
| 33156577 | AA_DPB1_55_33156577_D | 0.9612 | 0.971 | P | 0.35 | 0.47 | A | 1 | 1.70E-21 | 0.59 ( 0.53- 0.65) |
| 33156577 | AA_DPB1_55_33156577_E | 0.9338 | 0.951 | P | 0.52 | 0.38 | A | 1 | 1.09E-28 | 1.92 ( 1.71- 2.15) |
| 33156580 | AA_DPB1_56_33156580 | 0.8811 | 0.891 | E | 0.35 | 0.47 | A | 1 | 1.70E-21 | 0.59 ( 0.53- 0.65) |
| 33156583 | AA_DPB1_57_33156583 | 0.9391 | 0.91 | D | 0.10 | 0.17 | E | 1 | 4.94E-16 | 0.52 ( 0.44- 0.61) |
| 33156607 | AA_DPB1_65_33156607_I | 0.8182 | 0.745 | P | 0.95 | 0.93 | A | 1 | 9.68E-03 | 1.33 ( 1.07- 1.66) |
| 33156607 | AA_DPB1_65_33156607_L | 0.8261 | 0.753 | P | 0.05 | 0.07 | A | 1 | 6.91E-03 | 0.74 ( 0.60- 0.92) |
| 33156619 | AA_DPB1_69_33156619_E | 0.8342 | 0.857 | P | 0.36 | 0.45 | A | 1 | 6.87E-14 | 0.66 ( 0.59- 0.73) |
| 33156619 | AA_DPB1_69_33156619_K | 0.8333 | 0.856 | P | 0.64 | 0.55 | A | 1 | 6.87E-14 | 1.52 ( 1.36- 1.70) |
| 33156640 | AA_DPB1_76_33156640_I | 0.8404 | 0.818 | P | 0.04 | 0.06 | A | 1 | 4.69E-03 | 0.7 ( 0.55- 0.90) |
| 33156640 | AA_DPB1_76_33156640_M | 0.8844 | 0.846 | P | 0.89 | 0.85 | A | 1 | 6.19E-08 | 1.53 ( 1.31- 1.79) |
| 33156640 | AA_DPB1_76_33156640_V | 0.8766 | 0.842 | P | 0.07 | 0.10 | A | 1 | 6.61E-06 | 0.64 ( 0.53- 0.78) |
| 33156664 | AA_DPB1_84_33156664_D | 0.8828 | 0.936 | P | 0.58 | 0.55 | A | 1 | 1.91E-02 | 1.14 ( 1.02- 1.27) |
| 33156664 | AA_DPB1_84_33156664_G | 0.8888 | 0.941 | P | 0.42 | 0.45 | A | 1 | 1.80E-02 | 0.88 ( 0.79- 0.98) |
| 33156667 | AA_DPB1_85_33156667 | 0.8857 | 0.94 | G | 0.42 | 0.45 | E | 1 | 1.91E-02 | 0.88 ( 0.79- 0.98) |
| 33156670 | AA_DPB1_86_33156670 | 0.8859 | 0.941 | P | 0.42 | 0.45 | A | 1 | 1.91E-02 | 0.88 ( 0.79- 0.98) |
| 33156673 | AA_DPB1_87_33156673 | 0.886 | 0.941 | M | 0.42 | 0.45 | V | 1 | 1.91E-02 | 0.88 ( 0.79- 0.98) |
| 33157346 | HLA_DPB1_02 | 0.8787 | 0.91 | P | 0.27 | 0.28 | A | 1 | 1.85E-01 | 0.92 ( 0.82- 1.04) |
| 33157346 | HLA_DPB1_0201 | 0.9122 | 0.924 | P | 0.20 | 0.24 | A | 1 | 4.38E-04 | 0.8 ( 0.70- 0.90) |
| 33157346 | HLA_DPB1_0202 | 0.879 | 0.831 | P | 0.07 | 0.04 | A | 1 | 1.57E-04 | 1.56 ( 1.24- 1.97) |
| 33157346 | HLA_DPB1_03 | 0.8558 | 0.795 | P | 0.03 | 0.05 | A | 1 | 3.80E-03 | 0.68 ( 0.53- 0.88) |
| 33157346 | HLA_DPB1_0301 | 0.8558 | 0.795 | P | 0.03 | 0.05 | A | 1 | 3.80E-03 | 0.68 ( 0.53- 0.88) |
| 33157346 | HLA_DPB1_04 | 0.9099 | 0.898 | P | 0.15 | 0.16 | A | 1 | 1.31E-01 | 0.9 ( 0.78- 1.03) |
| 33157346 | HLA_DPB1_0401 | 0.8716 | 0.861 | P | 0.10 | 0.11 | A | 1 | 6.79E-01 | 0.97 ( 0.82- 1.14) |
| 33157346 | HLA_DPB1_0402 | 0.9728 | 0.97 | P | 0.05 | 0.06 | A | 1 | 6.07E-02 | 0.8 ( 0.64- 1.01) |
| 33157346 | HLA_DPB1_05 | 0.9181 | 0.9436 | P | 0.44 | 0.31 | A | 1 | 3.27E-26 | 1.9 ( 1.69- 2.14) |
| 33157346 | HLA_DPB1_0501 | 0.9211 | 0.9508 | P | 0.44 | 0.31 | A | 1 | 1.73E-26 | 1.91 ( 1.69- 2.15) |
| 33157346 | HLA_DPB1_09 | 0.8047 | 0.755 | P | 0.01 | 0.03 | A | 1 | 1.47E-03 | 0.54 ( 0.37- 0.79) |
| 33157346 | HLA_DPB1_0901 | 0.8057 | 0.756 | P | 0.01 | 0.03 | A | 1 | 1.47E-03 | 0.54 ( 0.37- 0.79) |
| 33157346 | HLA_DPB1_13 | 0.8852 | 0.858 | P | 0.03 | 0.05 | A | 1 | 1.99E-03 | 0.65 ( 0.50- 0.85) |
| 33157346 | HLA_DPB1_1301 | 0.8856 | 0.858 | P | 0.03 | 0.05 | A | 1 | 1.99E-03 | 0.65 ( 0.50- 0.85) |
| 33157346 | HLA_DPB1_17 | 1.0203 | 0.993 | P | 0.03 | 0.08 | A | 1 | 5.75E-13 | 0.4 ( 0.31- 0.52) |
| 33157346 | HLA_DPB1_1701 | 1.0213 | 0.993 | P | 0.03 | 0.08 | A | 1 | 5.75E-13 | 0.4 ( 0.31- 0.52) |
| 33160714 | AA_DPB1_96_33160714_K | 0.8726 | 0.942 | P | 0.55 | 0.46 | A | 1 | 7.48E-11 | 1.44 ( 1.29- 1.60) |
| 33160714 | AA_DPB1_96_33160714_R | 0.8844 | 0.957 | P | 0.45 | 0.52 | A | 1 | 4.00E-09 | 0.72 ( 0.65- 0.80) |
| 33160936 | AA_DPB1_170_33160936_I | 0.8728 | 0.942 | P | 0.55 | 0.46 | A | 1 | 7.48E-11 | 1.44 ( 1.29- 1.60) |
| 33160936 | AA_DPB1_170_33160936_T | 0.8844 | 0.957 | P | 0.45 | 0.52 | A | 1 | 4.00E-09 | 0.72 ( 0.65- 0.80) |
| 33160960 | AA_DPB1_178_33160960_L | 0.9118 | 0.902 | P | 0.95 | 0.93 | A | 1 | 2.86E-03 | 1.39 ( 1.12- 1.72) |
| 33160960 | AA_DPB1_178_33160960_M | 0.9702 | 0.968 | P | 0.05 | 0.06 | A | 1 | 6.07E-02 | 0.8 ( 0.64- 1.01) |
| 33161534 | AA_DPB1_187_33161534 | 0.9112 | 0.883 | x | 0.04 | 0.09 | K | 1 | 5.17E-15 | 0.4 ( 0.32- 0.51) |
| 33161537 | AA_DPB1_188_33161537 | 0.9116 | 0.883 | x | 0.04 | 0.09 | A | 1 | 5.17E-15 | 0.4 ( 0.32- 0.51) |
| 33161540 | AA_DPB1_189_33161540 | 0.9106 | 0.882 | x | 0.04 | 0.09 | Q | 1 | 5.17E-15 | 0.4 ( 0.32- 0.51) |
| 33161543 | AA_DPB1_190_33161543 | 0.9118 | 0.883 | x | 0.04 | 0.09 | S | 1 | 5.17E-15 | 0.4 ( 0.32- 0.51) |
| 33161546 | AA_DPB1_191_33161546 | 0.9118 | 0.883 | x | 0.04 | 0.09 | D | 1 | 5.17E-15 | 0.4 ( 0.32- 0.51) |
| 33161549 | AA_DPB1_192_33161549 | 0.9116 | 0.883 | x | 0.04 | 0.09 | S | 1 | 5.17E-15 | 0.4 ( 0.32- 0.51) |
| 33161552 | AA_DPB1_193_33161552 | 0.9117 | 0.883 | x | 0.04 | 0.09 | A | 1 | 5.17E-15 | 0.4 ( 0.32- 0.51) |
| 33161555 | AA_DPB1_194_33161555_R | 0.9023 | 0.871 | P | 0.96 | 0.91 | A | 1 | 4.59E-15 | 2.44 ( 1.95- 3.04) |
| 33161555 | AA_DPB1_194_33161555_x | 0.9118 | 0.883 | P | 0.04 | 0.09 | A | 1 | 5.17E-15 | 0.4 ( 0.32- 0.51) |
| 33161558 | AA_DPB1_195_33161558 | 0.9118 | 0.882 | x | 0.04 | 0.09 | S | 1 | 5.17E-15 | 0.4 ( 0.32- 0.51) |
| 33161561 | AA_DPB1_196_33161561 | 0.9122 | 0.882 | x | 0.04 | 0.09 | K | 1 | 5.17E-15 | 0.4 ( 0.32- 0.51) |
| 33161564 | AA_DPB1_197_33161564 | 0.9122 | 0.882 | x | 0.04 | 0.09 | T | 1 | 5.17E-15 | 0.4 ( 0.32- 0.51) |
| 33161567 | AA_DPB1_198_33161567 | 0.912 | 0.882 | x | 0.04 | 0.09 | L | 1 | 5.17E-15 | 0.4 ( 0.32- 0.51) |
| 33161570 | AA_DPB1_199_33161570 | 0.9123 | 0.883 | x | 0.04 | 0.09 | T | 1 | 5.17E-15 | 0.4 ( 0.32- 0.51) |
| 33161573 | AA_DPB1_200_33161573 | 0.9125 | 0.883 | x | 0.04 | 0.09 | G | 1 | 5.17E-15 | 0.4 ( 0.32- 0.51) |
| 33161576 | AA_DPB1_201_33161576 | 0.9123 | 0.883 | x | 0.04 | 0.09 | A | 1 | 5.17E-15 | 0.4 ( 0.32- 0.51) |
| 33161579 | AA_DPB1_202_33161579 | 0.9125 | 0.883 | x | 0.04 | 0.09 | G | 1 | 5.17E-15 | 0.4 ( 0.32- 0.51) |
| 33161582 | AA_DPB1_203_33161582 | 0.9116 | 0.882 | x | 0.04 | 0.09 | G | 1 | 5.17E-15 | 0.4 ( 0.32- 0.51) |
| 33161585 | AA_DPB1_204_33161585 | 0.9119 | 0.882 | x | 0.04 | 0.09 | F | 1 | 5.17E-15 | 0.4 ( 0.32- 0.51) |
| 33161588 | AA_DPB1_205_33161588_M | 0.9179 | 0.927 | P | 0.45 | 0.32 | A | 1 | 5.81E-26 | 1.89 ( 1.68- 2.12) |
| 33161588 | AA_DPB1_205_33161588_V | 0.9453 | 0.926 | P | 0.51 | 0.58 | A | 1 | 1.99E-09 | 0.71 ( 0.64- 0.80) |
| 33161588 | AA_DPB1_205_33161588_x | 0.9125 | 0.908 | P | 0.04 | 0.09 | A | 1 | 5.17E-15 | 0.4 ( 0.32- 0.51) |
| 33161591 | AA_DPB1_206_33161591 | 0.9119 | 0.882 | x | 0.04 | 0.09 | L | 1 | 5.17E-15 | 0.4 ( 0.32- 0.51) |
| 33161594 | AA_DPB1_207_33161594 | 0.9115 | 0.882 | x | 0.04 | 0.09 | G | 1 | 5.17E-15 | 0.4 ( 0.32- 0.51) |
| 33161597 | AA_DPB1_208_33161597 | 0.9125 | 0.883 | x | 0.04 | 0.09 | L | 1 | 5.17E-15 | 0.4 ( 0.32- 0.51) |
| 33161600 | AA_DPB1_209_33161600 | 0.9123 | 0.883 | x | 0.04 | 0.09 | I | 1 | 5.17E-15 | 0.4 ( 0.32- 0.51) |
| 33161603 | AA_DPB1_210_33161603 | 0.9124 | 0.883 | x | 0.04 | 0.09 | I | 1 | 5.17E-15 | 0.4 ( 0.32- 0.51) |
| 33161606 | AA_DPB1_211_33161606 | 0.9125 | 0.883 | x | 0.04 | 0.09 | C | 1 | 5.17E-15 | 0.4 ( 0.32- 0.51) |
| 33161609 | AA_DPB1_212_33161609 | 0.9124 | 0.883 | x | 0.04 | 0.09 | G | 1 | 5.17E-15 | 0.4 ( 0.32- 0.51) |
| 33161612 | AA_DPB1_213_33161612 | 0.9117 | 0.882 | x | 0.04 | 0.09 | V | 1 | 5.17E-15 | 0.4 ( 0.32- 0.51) |
| 33161615 | AA_DPB1_214_33161615 | 0.9125 | 0.883 | x | 0.04 | 0.09 | G | 1 | 5.17E-15 | 0.4 ( 0.32- 0.51) |
| 33161618 | AA_DPB1_215_33161618_I | 0.9259 | 0.865 | P | 0.96 | 0.91 | A | 1 | 1.26E-15 | 2.49 ( 1.99- 3.11) |
| 33161618 | AA_DPB1_215_33161618_x | 0.9119 | 0.882 | P | 0.04 | 0.09 | A | 1 | 5.17E-15 | 0.4 ( 0.32- 0.51) |
| 33161621 | AA_DPB1_216_33161621 | 0.9116 | 0.882 | x | 0.04 | 0.09 | F | 1 | 5.17E-15 | 0.4 ( 0.32- 0.51) |
| 33161624 | AA_DPB1_217_33161624 | 0.9122 | 0.883 | x | 0.04 | 0.09 | M | 1 | 5.17E-15 | 0.4 ( 0.32- 0.51) |
| 33161627 | AA_DPB1_218_33161627 | 0.9118 | 0.882 | x | 0.04 | 0.09 | H | 1 | 5.17E-15 | 0.4 ( 0.32- 0.51) |
| 33161630 | AA_DPB1_219_33161630 | 0.9122 | 0.882 | x | 0.04 | 0.09 | R | 1 | 5.17E-15 | 0.4 ( 0.32- 0.51) |
| 33161633 | AA_DPB1_220_33161633 | 0.9118 | 0.882 | x | 0.04 | 0.09 | R | 1 | 5.17E-15 | 0.4 ( 0.32- 0.51) |
| 33161636 | AA_DPB1_221_33161636 | 0.9125 | 0.883 | x | 0.04 | 0.09 | S | 1 | 5.17E-15 | 0.4 ( 0.32- 0.51) |
| 33161639 | AA_DPB1_222_33161639 | 0.9125 | 0.883 | x | 0.04 | 0.09 | K | 1 | 5.17E-15 | 0.4 ( 0.32- 0.51) |
| 33161642 | AA_DPB1_223_33161642 | 0.9125 | 0.883 | x | 0.04 | 0.09 | K | 1 | 5.17E-15 | 0.4 ( 0.32- 0.51) |
| 33161974 | AA_DPB1_224_33161974 | 0.9123 | 0.883 | x | 0.04 | 0.09 | V | 1 | 5.17E-15 | 0.4 ( 0.32- 0.51) |
| 33161977 | AA_DPB1_225_33161977 | 0.9123 | 0.883 | x | 0.04 | 0.09 | Q | 1 | 5.17E-15 | 0.4 ( 0.32- 0.51) |
| 33161980 | AA_DPB1_226_33161980 | 0.912 | 0.882 | x | 0.04 | 0.09 | R | 1 | 5.17E-15 | 0.4 ( 0.32- 0.51) |
| 33161983 | AA_DPB1_227_33161983 | 0.9123 | 0.883 | x | 0.04 | 0.09 | G | 1 | 5.17E-15 | 0.4 ( 0.32- 0.51) |
| 33161986 | AA_DPB1_228_33161986 | 0.9108 | 0.881 | x | 0.04 | 0.09 | S | 1 | 5.17E-15 | 0.4 ( 0.32- 0.51) |
| 33161989 | AA_DPB1_229_33161989 | 0.9155 | 0.886 | x | 0.04 | 0.09 | A | 1 | 5.17E-15 | 0.4 ( 0.32- 0.51) |

* Nominal *P* values for amino acid position were calculated using Omnibus test.

Nominal *P* values for amino acid residues and 2-digit and 4-digit classical HLA were calculated using binary test.

Supplementary Table S3. Haplotype analysis of four amino acid positions associated with Graves' disease.

|  |  | Frequency | |  |  |
| --- | --- | --- | --- | --- | --- |
| Molecule | Amino acid residues and Haplotype | 1,468 GD patients | 1,490 controls | *P*-value | OR (95% CI) |
| HLA-DRβ1 | Asp28 | 0.64 | 0.59 | 8.39E-06 | 1.26 ( 1.14- 1.40) |
|  | Glu28 | 0.19 | 0.29 | 4.26E-20 | 0.57 ( 0.50- 0.64) |
|  | His28 | 0.15 | 0.11 | 1.23E-05 | 1.4 ( 1.20- 1.62) |
| HLA-DPβ1 | Met205 | 0.45 | 0.32 | 5.81E-26 | 1.88 ( 1.67- 2.12) |
|  | Val205 | 0.51 | 0.58 | 1.99E-09 | 0.72 ( 0.64- 0.80) |
|  | Deletion205 | 0.04 | 0.09 | 5.17E-15 | 0.4 ( 0.32- 0.50) |
| HLA-DRβ1-DPβ1 | DRβ1 Asp28 - DPβ1 Val205 | 0.367 | 0.391 | 5.99E-02 | reference |
|  | DRβ1 Asp28 - DPβ1 Met205 | 0.285 | 0.196 | 2.04E-15 | 1.63 (1.38 - 1.92 ) |
|  | DRβ1 Glu28 - DPβ1 Val205 | 0.091 | 0.144 | 2.29E-10 | 0.66 (0.54 - 0.82 ) |
|  | DRβ1 Glu28 - DPβ1 Deletion205 | 0.032 | 0.081 | 7.77E-16 | 0.41 (0.32 - 0.54 ) |
|  | DRβ1 Glu28 - DPβ1 Met205 | 0.070 | 0.074 | 6.20E-01 | 1.11 (0.86 - 1.43 ) |
|  | DRβ1 His28 - DPβ1 Val205 | 0.060 | 0.058 | 6.97E-01 | 1.01 (0.76 - 1.35 ) |
|  | DRβ1 His28 - DPβ1 Met205 | 0.095 | 0.056 | 2.38E-08 | 2.05 (1.60 - 2.63 ) |
|  | OMNIBUS |  |  | 2.47E-35 |  |
| HLA-B | Ala199 | 0.98 | 0.95 | 1.76E-09 | 2.51 ( 1.87- 3.38) |
|  | Val199 | 0.02 | 0.05 | 1.76E-09 | 0.4 ( 0.30- 0.54) |
|  | Ile66 | 0.81 | 0.87 | 1.79E-10 | 0.63 ( 0.55- 0.73) |
|  | Lys66 | 0.14 | 0.06 | 5.81E-21 | 2.4 ( 2.00- 2.87) |
|  | Asn66 | 0.05 | 0.07 | 1.72E-02 | 0.76 ( 0.61- 0.95) |
| HLA-B | Ala199 - Ile66 | 0.786 | 0.818 | 2.53E-03 | reference |
|  | Ala199 - Asn66 | 0.050 | 0.065 | 1.53E-02 | 0.79(0.63 - 0.99) |
|  | Ala199 - Lys66 | 0.141 | 0.065 | 3.18E-22 | 2.31(1.92 - 2.78) |
|  | Val199 - Ile66 | 0.022 | 0.052 | 5.25E-10 | 0.42(0.31 - 0.57) |
|  | OMNIBUS |  |  | 9.75E-28 |  |

OR, odds ratio; Freq, haplotype frequency. Protective haplotypes are highlighted in green. Risk haplotypes are highlighted in red.

Supplementary Table S4. Association results of 997 pTRAb+ patients vs. 1,490 controls

| Build 36 position  (bp) | Variant ID | Allele 1 Frequency | | | | Nominal | | |
| --- | --- | --- | --- | --- | --- | --- | --- | --- |
| Allele 1 | 997 pTRAb+ patients | 1,490 controls | Allele 2 | Degree of Freedom | *P*logitic | OR (95%CI) |
| 33161588 | HLA-DPB1 position 205 |  |  |  |  | 2 | 7.52E-35 |  |
| 31432518 | HLA-B position 66 |  |  |  |  | 2 | 2.41E-18 |  |
| 31431300 | HLA-B position 199 |  |  |  |  | 2 | 6.55E-13 |  |
| 32659926 | HLA-DRB1 position 74 |  |  |  |  | 4 | 7.91E-22 |  |
| 33161588 | AA_DPB1_205_33161588_M | P | 0.47 | 0.32 | A | 1 | 3.56E-29 | 2.12( 1.86- 2.42) |
| 33161588 | AA_DPB1_205_33161588_V | P | 0.49 | 0.59 | A | 1 | 3.41E-12 | 0.65( 0.57- 0.73) |
| 33161588 | AA_DPB1_205_33161588_x | P | 0.04 | 0.09 | A | 1 | 5.66E-13 | 0.37( 0.28- 0.48) |
| 31432518 | AA_B_66_31432518_I | P | 0.81 | 0.87 | A | 1 | 1.22E-09 | 0.62( 0.53- 0.72) |
| 31432518 | AA_B_66_31432518_K | P | 0.14 | 0.06 | A | 1 | 9.64E-19 | 2.43( 1.99- 2.95) |
| 31432518 | AA_B_66_31432518_N | P | 0.05 | 0.06 | A | 1 | 5.71E-02 | 0.79( 0.62- 1.01) |
| 31431300 | AA_B_199_31431300_A | P | 0.98 | 0.94 | A | 1 | 1.09E-10 | 3.3( 2.30- 4.74) |
| 31431300 | AA_B_199_31431300_V | P | 0.02 | 0.06 | A | 1 | 1.09E-10 | 0.3( 0.21- 0.44) |
| 32659926 | AA_DRB1_74_32659926_A | P | 0.59 | 0.55 | A | 1 | 2.00E-02 | 1.15( 1.02- 1.29) |
| 32659926 | AA_DRB1_74_32659926_E | P | 0.23 | 0.20 | A | 1 | 3.99E-02 | 1.15( 1.01- 1.32) |
| 32659926 | AA_DRB1_74_32659926_L | P | 0.08 | 0.05 | A | 1 | 5.55E-04 | 1.5( 1.19- 1.89) |
| 32659926 | AA_DRB1_74_32659926_Q | P | 0.06 | 0.15 | A | 1 | 6.24E-20 | 0.38( 0.31- 0.47) |
| 32659926 | AA_DRB1_74_32659926_R | P | 0.05 | 0.04 | A | 1 | 7.95E-02 | 1.28( 0.97- 1.68) |

* Nominal *P* values for amino acid position were calculated using Omnibus test.

Nominal *P* values for amino acid residues and 2-digit and 4-digit classical HLA were calculated using binary test.

Supplementary Table S5. Association results of 410 pTRAb- patients vs. 1,490 controls.

| Build 36 position (bp) | Variant ID |  | Allele 1 Frequency | |  | Nominal | | |
| --- | --- | --- | --- | --- | --- | --- | --- | --- |
| Allele 1 | 410 pTRAb- patients | 1,490 controls | Allele 2 | Degree of Freedom | *P*logitic | OR (95%CI) |
| 31432509 | HLA-B position 69 |  |  |  |  | 2 | 1.83E-11 |  |
| 31432518 | HLA-B position 66 |  |  |  |  | 2 | 7.12E-12 |  |
| 31432518 | AA_B_66_31432518_I | A | 0.19 | 0.13 | P | 1 | 1.28E-05 | 1.59(1.29-1.96) |
| 31432518 | AA_B_66_31432518_N | P | 0.05 | 0.06 | A | 1 | 1.05E-01 | 0.75(0.53-1.06) |
| 31432518 | AA_B_66_31432518_K | P | 0.14 | 0.06 | A | 1 | 9.73E-13 | 2.52(1.95-3.25) |
| 31432509 | AA_B_69_31432509_T | P | 0.32 | 0.27 | A | 1 | 9.21E-04 | 1.33(1.13-1.58) |
| 31432509 | AA_B_69_31432509_A | P | 0.19 | 0.20 | A | 1 | 2.68E-01 | 0.89(0.73-1.09) |
| 31432509 | AA_B_69_31432509_R | A | 0.14 | 0.06 | P | 1 | 9.73E-13 | 2.52(1.95-3.25) |
| 31432488 | AA_B_76_31432488 | V | 0.14 | 0.06 | E | 1 | 9.73E-13 | 2.52(1.95-3.25) |
| 31431272 | HLA_B_4601 | P | 0.14 | 0.06 | A | 1 | 1.64E-12 | 2.52(1.95-3.25) |

* Nominal *P* values for amino acid position were calculated using Omnibus test.

Nominal *P* values for amino acid residues and 2-digit and 4-digit classical HLA were calculated using binary test.
